# Supplementary material for: Predicting Cognitive Functioning in High-Grade Glioma: Evaluating Different Representations of Tumor Location in a Common Space
Source: Research Square preprint supplement (doi:10.21203/rs.3.rs-3937209/v1), 2024-02-09
Supplement: Supplementary file 1 [file 49ba82d1e82a2bc2f9aba658.xlsx]

## Sheet: Sheet1
	Outcome measure	Explained variance (loo r2)	Selected hyperparameters	Representation	Number of dimensions	Representation type	R2 of the baseline model	Improvement over the baseline model
0	Verbal memory recognition	-0.00867675	{'alpha': 0.2, 'l1_ratio': 1}	Yeo 7 networks	7	atlas	-0.00867675	0
1	Verbal memory recognition	-0.0129249	{'alpha': 0.5, 'l1_ratio': 0.2}	Yeo 17 networks	17	atlas	-0.00867675	-0.00424816
2	Verbal memory recognition	-0.0182299	{'alpha': 0.8, 'l1_ratio': 0.2}	MNI maxprob per hemisphere	18	atlas	-0.00867675	-0.00955314
3	Verbal memory recognition	-0.00867675	{'alpha': 0.5, 'l1_ratio': 0.5}	Hemisphere	2	atlas	-0.00867675	0
4	Verbal memory recognition	-0.0414092	{'alpha': 1, 'l1_ratio': 0}	MNI maxprob	9	atlas	-0.00867675	-0.0327325
5	Verbal memory recognition	-0.00955396	{'alpha': 0.5, 'l1_ratio': 0.8}	AAL3v1	166	atlas	-0.00867675	-0.000877208
6	Verbal memory recognition	-0.0241743	{'alpha': 0.5, 'l1_ratio': 0.8}	HarvardOxford	113	atlas	-0.00867675	-0.0154975
7	Verbal memory recognition	-0.0235083	{'alpha': 0.5, 'l1_ratio': 0.8}	Brainnetome	246	atlas	-0.00867675	-0.0148315
8	Verbal memory recognition	-0.0204907	{'alpha': 0.5, 'l1_ratio': 1}	OASIS DKT	96	atlas	-0.00867675	-0.011814
9	Verbal memory recognition	0.0263685	{'alpha': 0.2, 'l1_ratio': 0.8}	MMP	360	atlas	-0.00867675	0.0350453
10	Verbal memory recognition	-0.0177065	{'alpha': 0.2, 'l1_ratio': 1}	Schaefer 100	100	atlas	-0.00867675	-0.00902973
11	Verbal memory recognition	-0.00539487	{'alpha': 0.2, 'l1_ratio': 1}	Schaefer 200	200	atlas	-0.00867675	0.00328188
12	Verbal memory recognition	-0.00087231	{'alpha': 0.2, 'l1_ratio': 1}	Schaefer 300	300	atlas	-0.00867675	0.00780444
13	Verbal memory recognition	-0.00867675	{'alpha': 0.2, 'l1_ratio': 0.8}	RandomAtlas002_0_RandomAtlas002_0	2	RandomAtlas	-0.00867675	0
14	Verbal memory recognition	-0.00867675	{'alpha': 0.2, 'l1_ratio': 0.8}	RandomAtlas002_1_RandomAtlas002_1	2	RandomAtlas	-0.00867675	0
15	Verbal memory recognition	-0.00867675	{'alpha': 0.5, 'l1_ratio': 0.5}	RandomAtlas002_2_RandomAtlas002_2	2	RandomAtlas	-0.00867675	0
16	Verbal memory recognition	0.0124214	{'alpha': 0.5, 'l1_ratio': 0}	RandomAtlas002_3_RandomAtlas002_3	2	RandomAtlas	-0.00867675	0.0210982
17	Verbal memory recognition	-0.00867675	{'alpha': 0.2, 'l1_ratio': 1}	RandomAtlas002_4_RandomAtlas002_4	2	RandomAtlas	-0.00867675	0
18	Verbal memory recognition	-0.00867675	{'alpha': 0.2, 'l1_ratio': 1}	Random atlas 3	3	RandomAtlas	-0.00867675	0
19	Verbal memory recognition	-0.0059823	{'alpha': 0.5, 'l1_ratio': 0}	Random atlas 3	3	RandomAtlas	-0.00867675	0.00269445
20	Verbal memory recognition	-0.00867675	{'alpha': 0.5, 'l1_ratio': 0.5}	Random atlas 3	3	RandomAtlas	-0.00867675	0
21	Verbal memory recognition	0.00581815	{'alpha': 0.2, 'l1_ratio': 0.5}	Random atlas 3	3	RandomAtlas	-0.00867675	0.0144949
22	Verbal memory recognition	0.000127094	{'alpha': 1, 'l1_ratio': 0}	Random atlas 3	3	RandomAtlas	-0.00867675	0.00880384
23	Verbal memory recognition	-0.0529384	{'alpha': 1, 'l1_ratio': 0}	Random atlas 7	7	RandomAtlas	-0.00867675	-0.0442617
24	Verbal memory recognition	-0.0405125	{'alpha': 0.5, 'l1_ratio': 0.8}	Random atlas 7	7	RandomAtlas	-0.00867675	-0.0318358
25	Verbal memory recognition	0.000469831	{'alpha': 0.2, 'l1_ratio': 0.2}	Random atlas 7	7	RandomAtlas	-0.00867675	0.00914658
26	Verbal memory recognition	-0.0164314	{'alpha': 0.2, 'l1_ratio': 1}	Random atlas 7	7	RandomAtlas	-0.00867675	-0.00775468
27	Verbal memory recognition	-0.00893625	{'alpha': 0.5, 'l1_ratio': 0.8}	Random atlas 7	7	RandomAtlas	-0.00867675	-0.000259504
28	Verbal memory recognition	0.0309478	{'alpha': 0.2, 'l1_ratio': 0.2}	RandomAtlas009_0_RandomAtlas009_0	9	RandomAtlas	-0.00867675	0.0396245
29	Verbal memory recognition	0.0193975	{'alpha': 1, 'l1_ratio': 0}	RandomAtlas009_1_RandomAtlas009_1	9	RandomAtlas	-0.00867675	0.0280742
30	Verbal memory recognition	0.0149808	{'alpha': 1, 'l1_ratio': 0}	RandomAtlas009_2_RandomAtlas009_2	9	RandomAtlas	-0.00867675	0.0236576
31	Verbal memory recognition	0.000959143	{'alpha': 0.2, 'l1_ratio': 0.8}	RandomAtlas009_3_RandomAtlas009_3	9	RandomAtlas	-0.00867675	0.00963589
32	Verbal memory recognition	0.00753819	{'alpha': 1, 'l1_ratio': 0}	RandomAtlas009_4_RandomAtlas009_4	9	RandomAtlas	-0.00867675	0.0162149
33	Verbal memory recognition	0.015992	{'alpha': 1, 'l1_ratio': 0}	RandomAtlas010_0_RandomAtlas010_0	10	RandomAtlas	-0.00867675	0.0246687
34	Verbal memory recognition	-0.0561177	{'alpha': 0.8, 'l1_ratio': 0}	RandomAtlas010_1_RandomAtlas010_1	10	RandomAtlas	-0.00867675	-0.047441
35	Verbal memory recognition	-0.0375973	{'alpha': 0.5, 'l1_ratio': 0.8}	RandomAtlas010_2_RandomAtlas010_2	10	RandomAtlas	-0.00867675	-0.0289206
36	Verbal memory recognition	0.0324093	{'alpha': 0.2, 'l1_ratio': 0.2}	RandomAtlas010_3_RandomAtlas010_3	10	RandomAtlas	-0.00867675	0.0410861
37	Verbal memory recognition	-0.0152604	{'alpha': 0.5, 'l1_ratio': 0.8}	RandomAtlas010_4_RandomAtlas010_4	10	RandomAtlas	-0.00867675	-0.00658366
38	Verbal memory recognition	-0.0627959	{'alpha': 1, 'l1_ratio': 0}	Random atlas 12	12	RandomAtlas	-0.00867675	-0.0541191
39	Verbal memory recognition	-0.0198483	{'alpha': 0.5, 'l1_ratio': 0.5}	Random atlas 12	12	RandomAtlas	-0.00867675	-0.0111716
40	Verbal memory recognition	0.0221832	{'alpha': 1, 'l1_ratio': 0}	Random atlas 12	12	RandomAtlas	-0.00867675	0.03086
41	Verbal memory recognition	0.0166138	{'alpha': 0.2, 'l1_ratio': 0.5}	Random atlas 12	12	RandomAtlas	-0.00867675	0.0252905
42	Verbal memory recognition	0.0299408	{'alpha': 1, 'l1_ratio': 0}	Random atlas 12	12	RandomAtlas	-0.00867675	0.0386176
43	Verbal memory recognition	-0.0374249	{'alpha': 0.5, 'l1_ratio': 0.8}	RandomAtlas014_0_RandomAtlas014_0	14	RandomAtlas	-0.00867675	-0.0287481
44	Verbal memory recognition	0.0141027	{'alpha': 0.2, 'l1_ratio': 0.5}	RandomAtlas014_1_RandomAtlas014_1	14	RandomAtlas	-0.00867675	0.0227794
45	Verbal memory recognition	0.0464916	{'alpha': 0.2, 'l1_ratio': 0.2}	RandomAtlas014_2_RandomAtlas014_2	14	RandomAtlas	-0.00867675	0.0551684
46	Verbal memory recognition	-0.00867675	{'alpha': 0.5, 'l1_ratio': 0.8}	RandomAtlas014_3_RandomAtlas014_3	14	RandomAtlas	-0.00867675	0
47	Verbal memory recognition	-0.0147649	{'alpha': 0.5, 'l1_ratio': 0.8}	RandomAtlas014_4_RandomAtlas014_4	14	RandomAtlas	-0.00867675	-0.00608814
48	Verbal memory recognition	0.0377439	{'alpha': 0.2, 'l1_ratio': 0.2}	Random atlas 17	17	RandomAtlas	-0.00867675	0.0464207
49	Verbal memory recognition	-0.00948937	{'alpha': 0.2, 'l1_ratio': 1}	Random atlas 17	17	RandomAtlas	-0.00867675	-0.000812626
50	Verbal memory recognition	-0.0425598	{'alpha': 1, 'l1_ratio': 0}	Random atlas 17	17	RandomAtlas	-0.00867675	-0.0338831
51	Verbal memory recognition	-0.0303533	{'alpha': 1, 'l1_ratio': 0}	Random atlas 17	17	RandomAtlas	-0.00867675	-0.0216766
52	Verbal memory recognition	-0.0231223	{'alpha': 0.5, 'l1_ratio': 0.8}	Random atlas 17	17	RandomAtlas	-0.00867675	-0.0144455
53	Verbal memory recognition	-0.0587757	{'alpha': 0.5, 'l1_ratio': 0.8}	Random atlas 18	18	RandomAtlas	-0.00867675	-0.050099
54	Verbal memory recognition	0.0562682	{'alpha': 0.2, 'l1_ratio': 0.5}	Random atlas 18	18	RandomAtlas	-0.00867675	0.0649449
55	Verbal memory recognition	-0.00533146	{'alpha': 0.2, 'l1_ratio': 0.5}	Random atlas 18	18	RandomAtlas	-0.00867675	0.00334529
56	Verbal memory recognition	-0.00765119	{'alpha': 0.2, 'l1_ratio': 1}	Random atlas 18	18	RandomAtlas	-0.00867675	0.00102556
57	Verbal memory recognition	-0.00821716	{'alpha': 0.5, 'l1_ratio': 0.2}	Random atlas 18	18	RandomAtlas	-0.00867675	0.000459591
58	Verbal memory recognition	0.0383372	{'alpha': 0.2, 'l1_ratio': 0.5}	RandomAtlas021_0_RandomAtlas021_0	21	RandomAtlas	-0.00867675	0.0470139
59	Verbal memory recognition	-0.00827822	{'alpha': 0.2, 'l1_ratio': 1}	RandomAtlas021_1_RandomAtlas021_1	21	RandomAtlas	-0.00867675	0.000398533
60	Verbal memory recognition	-0.00914399	{'alpha': 0.5, 'l1_ratio': 0.5}	RandomAtlas021_2_RandomAtlas021_2	21	RandomAtlas	-0.00867675	-0.000467237
61	Verbal memory recognition	-0.0076012	{'alpha': 0.2, 'l1_ratio': 1}	RandomAtlas021_3_RandomAtlas021_3	21	RandomAtlas	-0.00867675	0.00107555
62	Verbal memory recognition	0.00476732	{'alpha': 0.2, 'l1_ratio': 0.2}	RandomAtlas021_4_RandomAtlas021_4	21	RandomAtlas	-0.00867675	0.0134441
63	Verbal memory recognition	-0.00867675	{'alpha': 0.5, 'l1_ratio': 0.8}	RandomAtlas025_0_RandomAtlas025_0	25	RandomAtlas	-0.00867675	0
64	Verbal memory recognition	-0.0172163	{'alpha': 0.5, 'l1_ratio': 0.8}	RandomAtlas025_1_RandomAtlas025_1	25	RandomAtlas	-0.00867675	-0.00853952
65	Verbal memory recognition	-0.0363649	{'alpha': 1, 'l1_ratio': 0}	RandomAtlas025_2_RandomAtlas025_2	25	RandomAtlas	-0.00867675	-0.0276882
66	Verbal memory recognition	-0.0118716	{'alpha': 0.5, 'l1_ratio': 0.2}	RandomAtlas025_3_RandomAtlas025_3	25	RandomAtlas	-0.00867675	-0.0031948
67	Verbal memory recognition	-0.0223605	{'alpha': 1, 'l1_ratio': 0.2}	RandomAtlas025_4_RandomAtlas025_4	25	RandomAtlas	-0.00867675	-0.0136837
68	Verbal memory recognition	-0.0133906	{'alpha': 0.5, 'l1_ratio': 0.2}	RandomAtlas031_0_RandomAtlas031_0	31	RandomAtlas	-0.00867675	-0.00471384
69	Verbal memory recognition	0.0157011	{'alpha': 0.8, 'l1_ratio': 0}	RandomAtlas031_1_RandomAtlas031_1	31	RandomAtlas	-0.00867675	0.0243779
70	Verbal memory recognition	-0.00867675	{'alpha': 0.5, 'l1_ratio': 0.8}	RandomAtlas031_2_RandomAtlas031_2	31	RandomAtlas	-0.00867675	0
71	Verbal memory recognition	-0.0136856	{'alpha': 0.5, 'l1_ratio': 0.8}	RandomAtlas031_3_RandomAtlas031_3	31	RandomAtlas	-0.00867675	-0.00500886
72	Verbal memory recognition	-0.0373641	{'alpha': 0.5, 'l1_ratio': 0.2}	RandomAtlas031_4_RandomAtlas031_4	31	RandomAtlas	-0.00867675	-0.0286873
73	Verbal memory recognition	-0.0140515	{'alpha': 0.5, 'l1_ratio': 0.8}	RandomAtlas037_0_RandomAtlas037_0	37	RandomAtlas	-0.00867675	-0.00537473
74	Verbal memory recognition	0.0113215	{'alpha': 0.5, 'l1_ratio': 0.2}	RandomAtlas037_1_RandomAtlas037_1	37	RandomAtlas	-0.00867675	0.0199983
75	Verbal memory recognition	-0.0422923	{'alpha': 0.2, 'l1_ratio': 0.8}	RandomAtlas037_2_RandomAtlas037_2	37	RandomAtlas	-0.00867675	-0.0336156
76	Verbal memory recognition	-0.00849101	{'alpha': 0.2, 'l1_ratio': 1}	RandomAtlas037_3_RandomAtlas037_3	37	RandomAtlas	-0.00867675	0.000185739
77	Verbal memory recognition	-0.0639888	{'alpha': 0.2, 'l1_ratio': 1}	RandomAtlas037_4_RandomAtlas037_4	37	RandomAtlas	-0.00867675	-0.055312
78	Verbal memory recognition	-0.0328726	{'alpha': 0.5, 'l1_ratio': 0.8}	RandomAtlas045_0_RandomAtlas045_0	45	RandomAtlas	-0.00867675	-0.0241959
79	Verbal memory recognition	0.0297591	{'alpha': 0.2, 'l1_ratio': 0.5}	RandomAtlas045_1_RandomAtlas045_1	45	RandomAtlas	-0.00867675	0.0384359
80	Verbal memory recognition	-0.025483	{'alpha': 0.5, 'l1_ratio': 0.8}	RandomAtlas045_2_RandomAtlas045_2	45	RandomAtlas	-0.00867675	-0.0168063
81	Verbal memory recognition	0.000663284	{'alpha': 0.5, 'l1_ratio': 0.2}	RandomAtlas045_3_RandomAtlas045_3	45	RandomAtlas	-0.00867675	0.00934003
82	Verbal memory recognition	-0.00867675	{'alpha': 0.5, 'l1_ratio': 0.8}	RandomAtlas045_4_RandomAtlas045_4	45	RandomAtlas	-0.00867675	0
83	Verbal memory recognition	-0.00889414	{'alpha': 0.2, 'l1_ratio': 1}	RandomAtlas054_0_RandomAtlas054_0	54	RandomAtlas	-0.00867675	-0.000217391
84	Verbal memory recognition	-0.0257474	{'alpha': 0.2, 'l1_ratio': 1}	RandomAtlas054_1_RandomAtlas054_1	54	RandomAtlas	-0.00867675	-0.0170707
85	Verbal memory recognition	-0.0103179	{'alpha': 0.5, 'l1_ratio': 0.5}	RandomAtlas054_2_RandomAtlas054_2	54	RandomAtlas	-0.00867675	-0.00164118
86	Verbal memory recognition	0.0116036	{'alpha': 0.2, 'l1_ratio': 0.5}	RandomAtlas054_3_RandomAtlas054_3	54	RandomAtlas	-0.00867675	0.0202804
87	Verbal memory recognition	-0.0182827	{'alpha': 1, 'l1_ratio': 0.2}	RandomAtlas054_4_RandomAtlas054_4	54	RandomAtlas	-0.00867675	-0.00960597
88	Verbal memory recognition	0.0235755	{'alpha': 0.2, 'l1_ratio': 0.8}	RandomAtlas065_0_RandomAtlas065_0	65	RandomAtlas	-0.00867675	0.0322522
89	Verbal memory recognition	-0.0204853	{'alpha': 0.8, 'l1_ratio': 0.2}	RandomAtlas065_1_RandomAtlas065_1	65	RandomAtlas	-0.00867675	-0.0118086
90	Verbal memory recognition	-0.0162031	{'alpha': 0.8, 'l1_ratio': 0.2}	RandomAtlas065_2_RandomAtlas065_2	65	RandomAtlas	-0.00867675	-0.00752636
91	Verbal memory recognition	0.0105988	{'alpha': 0.2, 'l1_ratio': 0.8}	RandomAtlas065_3_RandomAtlas065_3	65	RandomAtlas	-0.00867675	0.0192756
92	Verbal memory recognition	-0.010528	{'alpha': 0.5, 'l1_ratio': 0.8}	RandomAtlas065_4_RandomAtlas065_4	65	RandomAtlas	-0.00867675	-0.00185126
93	Verbal memory recognition	-0.0270747	{'alpha': 0.5, 'l1_ratio': 0.8}	RandomAtlas079_0_RandomAtlas079_0	79	RandomAtlas	-0.00867675	-0.018398
94	Verbal memory recognition	-0.00932642	{'alpha': 0.5, 'l1_ratio': 0.5}	RandomAtlas079_1_RandomAtlas079_1	79	RandomAtlas	-0.00867675	-0.000649675
95	Verbal memory recognition	-0.0213322	{'alpha': 0.8, 'l1_ratio': 0.2}	RandomAtlas079_2_RandomAtlas079_2	79	RandomAtlas	-0.00867675	-0.0126555
96	Verbal memory recognition	-0.0141407	{'alpha': 1, 'l1_ratio': 0.2}	RandomAtlas079_3_RandomAtlas079_3	79	RandomAtlas	-0.00867675	-0.00546393
97	Verbal memory recognition	0.000921868	{'alpha': 0.5, 'l1_ratio': 0.2}	RandomAtlas079_4_RandomAtlas079_4	79	RandomAtlas	-0.00867675	0.00959862
98	Verbal memory recognition	-0.0106122	{'alpha': 0.5, 'l1_ratio': 0.8}	Random atlas 96	96	RandomAtlas	-0.00867675	-0.00193544
99	Verbal memory recognition	-0.00867675	{'alpha': 0.5, 'l1_ratio': 0.8}	Random atlas 96	96	RandomAtlas	-0.00867675	0
100	Verbal memory recognition	0.0216968	{'alpha': 0.2, 'l1_ratio': 0.8}	Random atlas 96	96	RandomAtlas	-0.00867675	0.0303736
101	Verbal memory recognition	-0.0107765	{'alpha': 0.5, 'l1_ratio': 0.8}	Random atlas 96	96	RandomAtlas	-0.00867675	-0.00209971
102	Verbal memory recognition	-0.0139836	{'alpha': 0.2, 'l1_ratio': 1}	Random atlas 96	96	RandomAtlas	-0.00867675	-0.0053068
103	Verbal memory recognition	-0.00116868	{'alpha': 0.8, 'l1_ratio': 0.2}	RandomAtlas100_0_RandomAtlas100_0	100	RandomAtlas	-0.00867675	0.00750806
104	Verbal memory recognition	-0.0128293	{'alpha': 0.2, 'l1_ratio': 0.8}	RandomAtlas100_1_RandomAtlas100_1	100	RandomAtlas	-0.00867675	-0.00415251
105	Verbal memory recognition	-0.00931176	{'alpha': 0.5, 'l1_ratio': 0.8}	RandomAtlas100_2_RandomAtlas100_2	100	RandomAtlas	-0.00867675	-0.000635013
106	Verbal memory recognition	-0.0187537	{'alpha': 0.5, 'l1_ratio': 0.8}	RandomAtlas100_3_RandomAtlas100_3	100	RandomAtlas	-0.00867675	-0.0100769
107	Verbal memory recognition	-0.0223465	{'alpha': 0.5, 'l1_ratio': 0.8}	RandomAtlas100_4_RandomAtlas100_4	100	RandomAtlas	-0.00867675	-0.0136697
108	Verbal memory recognition	-0.0105008	{'alpha': 0.5, 'l1_ratio': 0.8}	Random atlas 113	113	RandomAtlas	-0.00867675	-0.00182406
109	Verbal memory recognition	-0.0125461	{'alpha': 0.5, 'l1_ratio': 0.8}	Random atlas 113	113	RandomAtlas	-0.00867675	-0.00386935
110	Verbal memory recognition	-0.0175452	{'alpha': 0.5, 'l1_ratio': 0.8}	Random atlas 113	113	RandomAtlas	-0.00867675	-0.00886849
111	Verbal memory recognition	-0.0139075	{'alpha': 0.5, 'l1_ratio': 0.8}	Random atlas 113	113	RandomAtlas	-0.00867675	-0.00523077
112	Verbal memory recognition	-0.0206788	{'alpha': 0.2, 'l1_ratio': 1}	Random atlas 113	113	RandomAtlas	-0.00867675	-0.012002
113	Verbal memory recognition	-0.00865509	{'alpha': 0.5, 'l1_ratio': 0.8}	RandomAtlas116_0_RandomAtlas116_0	116	RandomAtlas	-0.00867675	2.16586e-05
114	Verbal memory recognition	-0.00144952	{'alpha': 0.2, 'l1_ratio': 1}	RandomAtlas116_1_RandomAtlas116_1	116	RandomAtlas	-0.00867675	0.00722723
115	Verbal memory recognition	-0.0170057	{'alpha': 1, 'l1_ratio': 0.2}	RandomAtlas116_2_RandomAtlas116_2	116	RandomAtlas	-0.00867675	-0.00832897
116	Verbal memory recognition	-0.0240561	{'alpha': 0.5, 'l1_ratio': 0.8}	RandomAtlas116_3_RandomAtlas116_3	116	RandomAtlas	-0.00867675	-0.0153794
117	Verbal memory recognition	-0.0154513	{'alpha': 1, 'l1_ratio': 0.2}	RandomAtlas116_4_RandomAtlas116_4	116	RandomAtlas	-0.00867675	-0.00677452
118	Verbal memory recognition	-0.0140278	{'alpha': 1, 'l1_ratio': 0.2}	RandomAtlas140_0_RandomAtlas140_0	140	RandomAtlas	-0.00867675	-0.00535101
119	Verbal memory recognition	0.0376426	{'alpha': 0.2, 'l1_ratio': 0.8}	RandomAtlas140_1_RandomAtlas140_1	140	RandomAtlas	-0.00867675	0.0463194
120	Verbal memory recognition	-0.00713757	{'alpha': 1, 'l1_ratio': 0.2}	RandomAtlas140_2_RandomAtlas140_2	140	RandomAtlas	-0.00867675	0.00153918
121	Verbal memory recognition	-0.0148972	{'alpha': 0.5, 'l1_ratio': 0.8}	RandomAtlas140_3_RandomAtlas140_3	140	RandomAtlas	-0.00867675	-0.00622047
122	Verbal memory recognition	0.00806767	{'alpha': 0.2, 'l1_ratio': 0.8}	RandomAtlas140_4_RandomAtlas140_4	140	RandomAtlas	-0.00867675	0.0167444
123	Verbal memory recognition	-0.0113633	{'alpha': 0.5, 'l1_ratio': 0.5}	Random atlas 166	166	RandomAtlas	-0.00867675	-0.00268654
124	Verbal memory recognition	-0.0104649	{'alpha': 0.2, 'l1_ratio': 1}	Random atlas 166	166	RandomAtlas	-0.00867675	-0.00178814
125	Verbal memory recognition	-0.010133	{'alpha': 0.5, 'l1_ratio': 0.8}	Random atlas 166	166	RandomAtlas	-0.00867675	-0.00145625
126	Verbal memory recognition	-0.0121938	{'alpha': 0.5, 'l1_ratio': 0.8}	Random atlas 166	166	RandomAtlas	-0.00867675	-0.00351709
127	Verbal memory recognition	-0.0143364	{'alpha': 0.5, 'l1_ratio': 0.8}	Random atlas 166	166	RandomAtlas	-0.00867675	-0.0056596
128	Verbal memory recognition	-0.0099208	{'alpha': 0.5, 'l1_ratio': 0.8}	RandomAtlas169_0_RandomAtlas169_0	169	RandomAtlas	-0.00867675	-0.00124406
129	Verbal memory recognition	-0.0122575	{'alpha': 0.5, 'l1_ratio': 0.8}	RandomAtlas169_1_RandomAtlas169_1	169	RandomAtlas	-0.00867675	-0.00358073
130	Verbal memory recognition	0.00115	{'alpha': 0.2, 'l1_ratio': 1}	RandomAtlas169_2_RandomAtlas169_2	169	RandomAtlas	-0.00867675	0.00982675
131	Verbal memory recognition	-0.0311391	{'alpha': 0.5, 'l1_ratio': 1}	RandomAtlas169_3_RandomAtlas169_3	169	RandomAtlas	-0.00867675	-0.0224623
132	Verbal memory recognition	-0.0139834	{'alpha': 0.5, 'l1_ratio': 0.8}	RandomAtlas169_4_RandomAtlas169_4	169	RandomAtlas	-0.00867675	-0.00530669
133	Verbal memory recognition	-0.00873572	{'alpha': 0.5, 'l1_ratio': 0.8}	Random atlas 200	200	RandomAtlas	-0.00867675	-5.89745e-05
134	Verbal memory recognition	0.00242367	{'alpha': 0.2, 'l1_ratio': 1}	Random atlas 200	200	RandomAtlas	-0.00867675	0.0111004
135	Verbal memory recognition	-0.0156324	{'alpha': 0.2, 'l1_ratio': 1}	Random atlas 200	200	RandomAtlas	-0.00867675	-0.00695566
136	Verbal memory recognition	-0.0102002	{'alpha': 0.5, 'l1_ratio': 0.5}	Random atlas 200	200	RandomAtlas	-0.00867675	-0.00152345
137	Verbal memory recognition	-0.015027	{'alpha': 0.5, 'l1_ratio': 0.8}	Random atlas 200	200	RandomAtlas	-0.00867675	-0.00635027
138	Verbal memory recognition	0.0159011	{'alpha': 0.2, 'l1_ratio': 1}	RandomAtlas204_0_RandomAtlas204_0	204	RandomAtlas	-0.00867675	0.0245778
139	Verbal memory recognition	-0.00807903	{'alpha': 0.5, 'l1_ratio': 1}	RandomAtlas204_1_RandomAtlas204_1	204	RandomAtlas	-0.00867675	0.000597719
140	Verbal memory recognition	-0.00037078	{'alpha': 0.2, 'l1_ratio': 1}	RandomAtlas204_2_RandomAtlas204_2	204	RandomAtlas	-0.00867675	0.00830597
141	Verbal memory recognition	-0.0158083	{'alpha': 0.5, 'l1_ratio': 0.5}	RandomAtlas204_3_RandomAtlas204_3	204	RandomAtlas	-0.00867675	-0.0071316
142	Verbal memory recognition	-0.00867675	{'alpha': 0.5, 'l1_ratio': 0.8}	RandomAtlas204_4_RandomAtlas204_4	204	RandomAtlas	-0.00867675	0
143	Verbal memory recognition	-0.00871419	{'alpha': 0.5, 'l1_ratio': 0.8}	Random atlas 246	246	RandomAtlas	-0.00867675	-3.74417e-05
144	Verbal memory recognition	-0.0209539	{'alpha': 0.5, 'l1_ratio': 1}	Random atlas 246	246	RandomAtlas	-0.00867675	-0.0122771
145	Verbal memory recognition	-0.0117586	{'alpha': 0.5, 'l1_ratio': 0.5}	Random atlas 246	246	RandomAtlas	-0.00867675	-0.00308182
146	Verbal memory recognition	-0.0138328	{'alpha': 0.5, 'l1_ratio': 0.8}	Random atlas 246	246	RandomAtlas	-0.00867675	-0.00515604
147	Verbal memory recognition	-0.0121205	{'alpha': 0.5, 'l1_ratio': 0.8}	Random atlas 246	246	RandomAtlas	-0.00867675	-0.00344373
148	Verbal memory recognition	-0.0101153	{'alpha': 0.5, 'l1_ratio': 0.5}	RandomAtlas298_0_RandomAtlas298_0	298	RandomAtlas	-0.00867675	-0.00143853
149	Verbal memory recognition	-0.00713133	{'alpha': 0.5, 'l1_ratio': 0.5}	RandomAtlas298_1_RandomAtlas298_1	298	RandomAtlas	-0.00867675	0.00154542
150	Verbal memory recognition	-0.0169623	{'alpha': 0.5, 'l1_ratio': 0.8}	RandomAtlas298_2_RandomAtlas298_2	298	RandomAtlas	-0.00867675	-0.00828551
151	Verbal memory recognition	-0.0118601	{'alpha': 0.5, 'l1_ratio': 0.8}	RandomAtlas298_3_RandomAtlas298_3	298	RandomAtlas	-0.00867675	-0.00318335
152	Verbal memory recognition	-0.0239887	{'alpha': 0.8, 'l1_ratio': 0.2}	RandomAtlas298_4_RandomAtlas298_4	298	RandomAtlas	-0.00867675	-0.0153119
153	Verbal memory recognition	-0.0111992	{'alpha': 1, 'l1_ratio': 0.2}	Random atlas 300	300	RandomAtlas	-0.00867675	-0.00252245
154	Verbal memory recognition	-0.01361	{'alpha': 0.5, 'l1_ratio': 0.5}	Random atlas 300	300	RandomAtlas	-0.00867675	-0.00493324
155	Verbal memory recognition	-0.00910095	{'alpha': 0.5, 'l1_ratio': 1}	Random atlas 300	300	RandomAtlas	-0.00867675	-0.000424202
156	Verbal memory recognition	-0.0075412	{'alpha': 0.5, 'l1_ratio': 0.5}	Random atlas 300	300	RandomAtlas	-0.00867675	0.00113555
157	Verbal memory recognition	-0.0104513	{'alpha': 0.5, 'l1_ratio': 0.8}	Random atlas 300	300	RandomAtlas	-0.00867675	-0.00177454
158	Verbal memory recognition	-0.00393422	{'alpha': 0.2, 'l1_ratio': 0.8}	Random atlas 360	360	RandomAtlas	-0.00867675	0.00474253
159	Verbal memory recognition	-0.00946889	{'alpha': 0.5, 'l1_ratio': 0.5}	Random atlas 360	360	RandomAtlas	-0.00867675	-0.000792141
160	Verbal memory recognition	-0.0235043	{'alpha': 0.2, 'l1_ratio': 0.8}	Random atlas 360	360	RandomAtlas	-0.00867675	-0.0148275
161	Verbal memory recognition	-0.00573025	{'alpha': 0.2, 'l1_ratio': 1}	Random atlas 360	360	RandomAtlas	-0.00867675	0.0029465
162	Verbal memory recognition	-0.00509864	{'alpha': 0.8, 'l1_ratio': 0.2}	Random atlas 360	360	RandomAtlas	-0.00867675	0.00357811
163	Verbal memory recognition	-0.030444	{'alpha': 1, 'l1_ratio': 0}	pca_2	2	pca	-0.00867675	-0.0217672
164	Verbal memory recognition	-0.0315161	{'alpha': 0.5, 'l1_ratio': 0.8}	pca_3	3	pca	-0.00867675	-0.0228393
165	Verbal memory recognition	0.0216292	{'alpha': 1, 'l1_ratio': 0}	pca_7	7	pca	-0.00867675	0.030306
166	Verbal memory recognition	-0.0504996	{'alpha': 1, 'l1_ratio': 0}	pca_9	9	pca	-0.00867675	-0.0418228
167	Verbal memory recognition	-0.0123992	{'alpha': 0.5, 'l1_ratio': 0.8}	pca_10	10	pca	-0.00867675	-0.00372247
168	Verbal memory recognition	-0.00867675	{'alpha': 0.5, 'l1_ratio': 0.8}	pca_12	12	pca	-0.00867675	0
169	Verbal memory recognition	-0.00867675	{'alpha': 0.5, 'l1_ratio': 0.8}	pca_14	14	pca	-0.00867675	0
170	Verbal memory recognition	-0.00867675	{'alpha': 0.5, 'l1_ratio': 0.8}	pca_17	17	pca	-0.00867675	0
171	Verbal memory recognition	-0.00867675	{'alpha': 0.5, 'l1_ratio': 0.8}	pca_18	18	pca	-0.00867675	0
172	Verbal memory recognition	-0.00867675	{'alpha': 0.5, 'l1_ratio': 0.8}	pca_21	21	pca	-0.00867675	0
173	Verbal memory recognition	-0.00867675	{'alpha': 0.5, 'l1_ratio': 0.8}	pca_25	25	pca	-0.00867675	0
174	Verbal memory recognition	0.0150525	{'alpha': 0.2, 'l1_ratio': 1}	pca_31	31	pca	-0.00867675	0.0237292
175	Verbal memory recognition	0.0150033	{'alpha': 0.2, 'l1_ratio': 1}	pca_37	37	pca	-0.00867675	0.02368
176	Verbal memory recognition	0.0150033	{'alpha': 0.2, 'l1_ratio': 1}	pca_45	45	pca	-0.00867675	0.02368
177	Verbal memory recognition	0.0150033	{'alpha': 0.2, 'l1_ratio': 1}	pca_54	54	pca	-0.00867675	0.02368
178	Verbal memory recognition	0.013786	{'alpha': 0.2, 'l1_ratio': 1}	pca_65	65	pca	-0.00867675	0.0224627
179	Verbal memory recognition	0.0097334	{'alpha': 0.2, 'l1_ratio': 1}	pca_79	79	pca	-0.00867675	0.0184101
180	Verbal memory recognition	0.00605245	{'alpha': 0.2, 'l1_ratio': 1}	pca_96	96	pca	-0.00867675	0.0147292
181	Verbal memory recognition	0.00264069	{'alpha': 0.2, 'l1_ratio': 1}	pca_100	100	pca	-0.00867675	0.0113174
182	Verbal memory recognition	0.00264069	{'alpha': 0.2, 'l1_ratio': 1}	pca_113	113	pca	-0.00867675	0.0113174
183	Verbal memory recognition	0.00264069	{'alpha': 0.2, 'l1_ratio': 1}	pca_116	116	pca	-0.00867675	0.0113174
184	Verbal memory recognition	-3.16038e-05	{'alpha': 0.5, 'l1_ratio': 0.5}	pca_140	140	pca	-0.00867675	0.00864515
185	Verbal memory recognition	-0.000373397	{'alpha': 0.5, 'l1_ratio': 0.5}	pca_166	166	pca	-0.00867675	0.00830335
186	Verbal memory recognition	-0.000373397	{'alpha': 0.5, 'l1_ratio': 0.5}	pca_169	169	pca	-0.00867675	0.00830335
187	Verbal memory recognition	-0.000706399	{'alpha': 0.5, 'l1_ratio': 0.5}	pca_200	200	pca	-0.00867675	0.00797035
188	Verbal memory recognition	-0.000706399	{'alpha': 0.5, 'l1_ratio': 0.5}	pca_204	204	pca	-0.00867675	0.00797035
189	Verbal memory recognition	0.00193179	{'alpha': 0.5, 'l1_ratio': 0.5}	pca_246	246	pca	-0.00867675	0.0106085
190	Verbal memory recognition	-0.00495263	{'alpha': 0.2, 'l1_ratio': 1}	pca_298	298	pca	-0.00867675	0.00372412
191	Verbal memory recognition	-0.00495263	{'alpha': 0.2, 'l1_ratio': 1}	pca_300	300	pca	-0.00867675	0.00372412
192	Verbal memory recognition	-0.00796651	{'alpha': 0.5, 'l1_ratio': 0.5}	pca_360	360	pca	-0.00867675	0.000710241
193	Visual memory recognition	0.0306412	{'alpha': 0.5, 'l1_ratio': 0}	Yeo 7 networks	7	atlas	-0.00524189	0.0358831
194	Visual memory recognition	0.0762156	{'alpha': 0.2, 'l1_ratio': 0.2}	Yeo 17 networks	17	atlas	-0.00524189	0.0814575
195	Visual memory recognition	0.0638681	{'alpha': 0.8, 'l1_ratio': 0}	MNI maxprob per hemisphere	18	atlas	-0.00524189	0.06911
196	Visual memory recognition	0.04122	{'alpha': 0.5, 'l1_ratio': 0}	Hemisphere	2	atlas	-0.00524189	0.0464618
197	Visual memory recognition	0.0632324	{'alpha': 0.2, 'l1_ratio': 0.2}	MNI maxprob	9	atlas	-0.00524189	0.0684743
198	Visual memory recognition	-0.0103983	{'alpha': 0.8, 'l1_ratio': 0.2}	AAL3v1	166	atlas	-0.00524189	-0.00515636
199	Visual memory recognition	0.103187	{'alpha': 1, 'l1_ratio': 0}	HarvardOxford	113	atlas	-0.00524189	0.108429
200	Visual memory recognition	0.052324	{'alpha': 0.5, 'l1_ratio': 0.2}	Brainnetome	246	atlas	-0.00524189	0.0575659
201	Visual memory recognition	0.0926483	{'alpha': 0.5, 'l1_ratio': 0.2}	OASIS DKT	96	atlas	-0.00524189	0.0978902
202	Visual memory recognition	0.0226573	{'alpha': 0.5, 'l1_ratio': 0.2}	MMP	360	atlas	-0.00524189	0.0278992
203	Visual memory recognition	0.0294848	{'alpha': 0.5, 'l1_ratio': 0.2}	Schaefer 100	100	atlas	-0.00524189	0.0347267
204	Visual memory recognition	0.0458762	{'alpha': 0.2, 'l1_ratio': 1}	Schaefer 200	200	atlas	-0.00524189	0.0511181
205	Visual memory recognition	0.026133	{'alpha': 0.2, 'l1_ratio': 1}	Schaefer 300	300	atlas	-0.00524189	0.0313749
206	Visual memory recognition	-0.0379908	{'alpha': 0.5, 'l1_ratio': 0.5}	RandomAtlas002_0_RandomAtlas002_0	2	RandomAtlas	-0.00524189	-0.0327489
207	Visual memory recognition	0.0208314	{'alpha': 0.2, 'l1_ratio': 0}	RandomAtlas002_1_RandomAtlas002_1	2	RandomAtlas	-0.00524189	0.0260733
208	Visual memory recognition	0.0557102	{'alpha': 0.2, 'l1_ratio': 0}	RandomAtlas002_2_RandomAtlas002_2	2	RandomAtlas	-0.00524189	0.0609521
209	Visual memory recognition	0.00987971	{'alpha': 0.2, 'l1_ratio': 0.2}	RandomAtlas002_3_RandomAtlas002_3	2	RandomAtlas	-0.00524189	0.0151216
210	Visual memory recognition	0.0214318	{'alpha': 0.8, 'l1_ratio': 0}	RandomAtlas002_4_RandomAtlas002_4	2	RandomAtlas	-0.00524189	0.0266737
211	Visual memory recognition	-0.000423016	{'alpha': 1, 'l1_ratio': 0}	Random atlas 3	3	RandomAtlas	-0.00524189	0.00481887
212	Visual memory recognition	0.0862842	{'alpha': 0.2, 'l1_ratio': 0.2}	Random atlas 3	3	RandomAtlas	-0.00524189	0.0915261
213	Visual memory recognition	0.0746994	{'alpha': 0.2, 'l1_ratio': 0}	Random atlas 3	3	RandomAtlas	-0.00524189	0.0799413
214	Visual memory recognition	-0.0274885	{'alpha': 0.2, 'l1_ratio': 0.5}	Random atlas 3	3	RandomAtlas	-0.00524189	-0.0222466
215	Visual memory recognition	0.0808545	{'alpha': 0.2, 'l1_ratio': 0}	Random atlas 3	3	RandomAtlas	-0.00524189	0.0860964
216	Visual memory recognition	0.0800726	{'alpha': 0.2, 'l1_ratio': 0.2}	Random atlas 7	7	RandomAtlas	-0.00524189	0.0853145
217	Visual memory recognition	0.0782708	{'alpha': 0.5, 'l1_ratio': 0}	Random atlas 7	7	RandomAtlas	-0.00524189	0.0835127
218	Visual memory recognition	0.0675093	{'alpha': 0.5, 'l1_ratio': 0}	Random atlas 7	7	RandomAtlas	-0.00524189	0.0727512
219	Visual memory recognition	0.0940736	{'alpha': 0.2, 'l1_ratio': 0.2}	Random atlas 7	7	RandomAtlas	-0.00524189	0.0993155
220	Visual memory recognition	0.0757868	{'alpha': 0.5, 'l1_ratio': 0}	Random atlas 7	7	RandomAtlas	-0.00524189	0.0810287
221	Visual memory recognition	0.0970199	{'alpha': 0.2, 'l1_ratio': 0}	RandomAtlas009_0_RandomAtlas009_0	9	RandomAtlas	-0.00524189	0.102262
222	Visual memory recognition	0.0775699	{'alpha': 0.2, 'l1_ratio': 0.2}	RandomAtlas009_1_RandomAtlas009_1	9	RandomAtlas	-0.00524189	0.0828118
223	Visual memory recognition	0.0638173	{'alpha': 0.2, 'l1_ratio': 0}	RandomAtlas009_2_RandomAtlas009_2	9	RandomAtlas	-0.00524189	0.0690591
224	Visual memory recognition	0.094908	{'alpha': 0.2, 'l1_ratio': 0}	RandomAtlas009_3_RandomAtlas009_3	9	RandomAtlas	-0.00524189	0.10015
225	Visual memory recognition	0.0888585	{'alpha': 0.2, 'l1_ratio': 0.2}	RandomAtlas009_4_RandomAtlas009_4	9	RandomAtlas	-0.00524189	0.0941003
226	Visual memory recognition	0.081459	{'alpha': 0.5, 'l1_ratio': 0}	RandomAtlas010_0_RandomAtlas010_0	10	RandomAtlas	-0.00524189	0.0867009
227	Visual memory recognition	0.054323	{'alpha': 1, 'l1_ratio': 0}	RandomAtlas010_1_RandomAtlas010_1	10	RandomAtlas	-0.00524189	0.0595648
228	Visual memory recognition	0.0637547	{'alpha': 0.5, 'l1_ratio': 0}	RandomAtlas010_2_RandomAtlas010_2	10	RandomAtlas	-0.00524189	0.0689966
229	Visual memory recognition	0.0537995	{'alpha': 0.2, 'l1_ratio': 0.5}	RandomAtlas010_3_RandomAtlas010_3	10	RandomAtlas	-0.00524189	0.0590414
230	Visual memory recognition	0.0578443	{'alpha': 0.5, 'l1_ratio': 0}	RandomAtlas010_4_RandomAtlas010_4	10	RandomAtlas	-0.00524189	0.0630862
231	Visual memory recognition	0.0838943	{'alpha': 0.5, 'l1_ratio': 0}	Random atlas 12	12	RandomAtlas	-0.00524189	0.0891362
232	Visual memory recognition	0.0992816	{'alpha': 0.2, 'l1_ratio': 0.5}	Random atlas 12	12	RandomAtlas	-0.00524189	0.104523
233	Visual memory recognition	0.0765748	{'alpha': 0.5, 'l1_ratio': 0}	Random atlas 12	12	RandomAtlas	-0.00524189	0.0818167
234	Visual memory recognition	0.0832951	{'alpha': 0.2, 'l1_ratio': 0.5}	Random atlas 12	12	RandomAtlas	-0.00524189	0.088537
235	Visual memory recognition	0.0836858	{'alpha': 0.2, 'l1_ratio': 0.5}	Random atlas 12	12	RandomAtlas	-0.00524189	0.0889277
236	Visual memory recognition	0.0984278	{'alpha': 0.2, 'l1_ratio': 0.2}	RandomAtlas014_0_RandomAtlas014_0	14	RandomAtlas	-0.00524189	0.10367
237	Visual memory recognition	0.0792815	{'alpha': 0.2, 'l1_ratio': 0.2}	RandomAtlas014_1_RandomAtlas014_1	14	RandomAtlas	-0.00524189	0.0845234
238	Visual memory recognition	0.0658724	{'alpha': 0.8, 'l1_ratio': 0}	RandomAtlas014_2_RandomAtlas014_2	14	RandomAtlas	-0.00524189	0.0711143
239	Visual memory recognition	0.0785712	{'alpha': 0.8, 'l1_ratio': 0}	RandomAtlas014_3_RandomAtlas014_3	14	RandomAtlas	-0.00524189	0.0838131
240	Visual memory recognition	0.0990351	{'alpha': 0.5, 'l1_ratio': 0}	RandomAtlas014_4_RandomAtlas014_4	14	RandomAtlas	-0.00524189	0.104277
241	Visual memory recognition	0.090879	{'alpha': 0.2, 'l1_ratio': 0.2}	Random atlas 17	17	RandomAtlas	-0.00524189	0.0961209
242	Visual memory recognition	0.0696152	{'alpha': 0.8, 'l1_ratio': 0}	Random atlas 17	17	RandomAtlas	-0.00524189	0.074857
243	Visual memory recognition	0.0839628	{'alpha': 1, 'l1_ratio': 0}	Random atlas 17	17	RandomAtlas	-0.00524189	0.0892047
244	Visual memory recognition	0.0855586	{'alpha': 0.8, 'l1_ratio': 0}	Random atlas 17	17	RandomAtlas	-0.00524189	0.0908005
245	Visual memory recognition	0.0608813	{'alpha': 1, 'l1_ratio': 0}	Random atlas 17	17	RandomAtlas	-0.00524189	0.0661232
246	Visual memory recognition	0.0652994	{'alpha': 0.5, 'l1_ratio': 0.2}	Random atlas 18	18	RandomAtlas	-0.00524189	0.0705413
247	Visual memory recognition	0.087733	{'alpha': 0.5, 'l1_ratio': 0}	Random atlas 18	18	RandomAtlas	-0.00524189	0.0929748
248	Visual memory recognition	0.0681517	{'alpha': 0.8, 'l1_ratio': 0}	Random atlas 18	18	RandomAtlas	-0.00524189	0.0733936
249	Visual memory recognition	0.0759884	{'alpha': 0.8, 'l1_ratio': 0}	Random atlas 18	18	RandomAtlas	-0.00524189	0.0812303
250	Visual memory recognition	0.0727656	{'alpha': 0.5, 'l1_ratio': 0}	Random atlas 18	18	RandomAtlas	-0.00524189	0.0780075
251	Visual memory recognition	0.0732159	{'alpha': 1, 'l1_ratio': 0}	RandomAtlas021_0_RandomAtlas021_0	21	RandomAtlas	-0.00524189	0.0784578
252	Visual memory recognition	0.0598637	{'alpha': 0.2, 'l1_ratio': 0.5}	RandomAtlas021_1_RandomAtlas021_1	21	RandomAtlas	-0.00524189	0.0651055
253	Visual memory recognition	0.100729	{'alpha': 0.5, 'l1_ratio': 0}	RandomAtlas021_2_RandomAtlas021_2	21	RandomAtlas	-0.00524189	0.105971
254	Visual memory recognition	0.0882955	{'alpha': 0.8, 'l1_ratio': 0}	RandomAtlas021_3_RandomAtlas021_3	21	RandomAtlas	-0.00524189	0.0935374
255	Visual memory recognition	0.129485	{'alpha': 0.5, 'l1_ratio': 0}	RandomAtlas021_4_RandomAtlas021_4	21	RandomAtlas	-0.00524189	0.134727
256	Visual memory recognition	0.099388	{'alpha': 0.2, 'l1_ratio': 0.2}	RandomAtlas025_0_RandomAtlas025_0	25	RandomAtlas	-0.00524189	0.10463
257	Visual memory recognition	0.0908803	{'alpha': 0.2, 'l1_ratio': 0.5}	RandomAtlas025_1_RandomAtlas025_1	25	RandomAtlas	-0.00524189	0.0961222
258	Visual memory recognition	0.095422	{'alpha': 0.2, 'l1_ratio': 0.5}	RandomAtlas025_2_RandomAtlas025_2	25	RandomAtlas	-0.00524189	0.100664
259	Visual memory recognition	0.0833576	{'alpha': 1, 'l1_ratio': 0}	RandomAtlas025_3_RandomAtlas025_3	25	RandomAtlas	-0.00524189	0.0885995
260	Visual memory recognition	0.0742224	{'alpha': 0.8, 'l1_ratio': 0}	RandomAtlas025_4_RandomAtlas025_4	25	RandomAtlas	-0.00524189	0.0794643
261	Visual memory recognition	0.052626	{'alpha': 0.2, 'l1_ratio': 0.5}	RandomAtlas031_0_RandomAtlas031_0	31	RandomAtlas	-0.00524189	0.0578679
262	Visual memory recognition	0.089456	{'alpha': 0.8, 'l1_ratio': 0}	RandomAtlas031_1_RandomAtlas031_1	31	RandomAtlas	-0.00524189	0.0946979
263	Visual memory recognition	0.0815984	{'alpha': 0.2, 'l1_ratio': 0.2}	RandomAtlas031_2_RandomAtlas031_2	31	RandomAtlas	-0.00524189	0.0868403
264	Visual memory recognition	0.107274	{'alpha': 0.8, 'l1_ratio': 0}	RandomAtlas031_3_RandomAtlas031_3	31	RandomAtlas	-0.00524189	0.112516
265	Visual memory recognition	0.105716	{'alpha': 1, 'l1_ratio': 0}	RandomAtlas031_4_RandomAtlas031_4	31	RandomAtlas	-0.00524189	0.110958
266	Visual memory recognition	0.100556	{'alpha': 0.8, 'l1_ratio': 0}	RandomAtlas037_0_RandomAtlas037_0	37	RandomAtlas	-0.00524189	0.105797
267	Visual memory recognition	0.0421421	{'alpha': 1, 'l1_ratio': 0}	RandomAtlas037_1_RandomAtlas037_1	37	RandomAtlas	-0.00524189	0.047384
268	Visual memory recognition	0.0498788	{'alpha': 0.2, 'l1_ratio': 0.5}	RandomAtlas037_2_RandomAtlas037_2	37	RandomAtlas	-0.00524189	0.0551206
269	Visual memory recognition	0.0438483	{'alpha': 0.2, 'l1_ratio': 0.5}	RandomAtlas037_3_RandomAtlas037_3	37	RandomAtlas	-0.00524189	0.0490902
270	Visual memory recognition	0.0786153	{'alpha': 1, 'l1_ratio': 0}	RandomAtlas037_4_RandomAtlas037_4	37	RandomAtlas	-0.00524189	0.0838572
271	Visual memory recognition	0.0606701	{'alpha': 0.2, 'l1_ratio': 0.5}	RandomAtlas045_0_RandomAtlas045_0	45	RandomAtlas	-0.00524189	0.065912
272	Visual memory recognition	0.111086	{'alpha': 0.2, 'l1_ratio': 0.2}	RandomAtlas045_1_RandomAtlas045_1	45	RandomAtlas	-0.00524189	0.116328
273	Visual memory recognition	0.108711	{'alpha': 0.2, 'l1_ratio': 0.5}	RandomAtlas045_2_RandomAtlas045_2	45	RandomAtlas	-0.00524189	0.113953
274	Visual memory recognition	0.0851001	{'alpha': 1, 'l1_ratio': 0}	RandomAtlas045_3_RandomAtlas045_3	45	RandomAtlas	-0.00524189	0.090342
275	Visual memory recognition	0.0887025	{'alpha': 1, 'l1_ratio': 0}	RandomAtlas045_4_RandomAtlas045_4	45	RandomAtlas	-0.00524189	0.0939444
276	Visual memory recognition	0.0850118	{'alpha': 1, 'l1_ratio': 0}	RandomAtlas054_0_RandomAtlas054_0	54	RandomAtlas	-0.00524189	0.0902537
277	Visual memory recognition	0.076892	{'alpha': 1, 'l1_ratio': 0}	RandomAtlas054_1_RandomAtlas054_1	54	RandomAtlas	-0.00524189	0.0821339
278	Visual memory recognition	0.10299	{'alpha': 1, 'l1_ratio': 0}	RandomAtlas054_2_RandomAtlas054_2	54	RandomAtlas	-0.00524189	0.108232
279	Visual memory recognition	0.0975157	{'alpha': 1, 'l1_ratio': 0}	RandomAtlas054_3_RandomAtlas054_3	54	RandomAtlas	-0.00524189	0.102758
280	Visual memory recognition	0.0399255	{'alpha': 0.5, 'l1_ratio': 0.2}	RandomAtlas054_4_RandomAtlas054_4	54	RandomAtlas	-0.00524189	0.0451674
281	Visual memory recognition	0.0693242	{'alpha': 1, 'l1_ratio': 0}	RandomAtlas065_0_RandomAtlas065_0	65	RandomAtlas	-0.00524189	0.0745661
282	Visual memory recognition	0.101064	{'alpha': 1, 'l1_ratio': 0}	RandomAtlas065_1_RandomAtlas065_1	65	RandomAtlas	-0.00524189	0.106306
283	Visual memory recognition	0.0724398	{'alpha': 1, 'l1_ratio': 0}	RandomAtlas065_2_RandomAtlas065_2	65	RandomAtlas	-0.00524189	0.0776817
284	Visual memory recognition	0.0571643	{'alpha': 0.2, 'l1_ratio': 0.5}	RandomAtlas065_3_RandomAtlas065_3	65	RandomAtlas	-0.00524189	0.0624062
285	Visual memory recognition	0.0824524	{'alpha': 1, 'l1_ratio': 0}	RandomAtlas065_4_RandomAtlas065_4	65	RandomAtlas	-0.00524189	0.0876943
286	Visual memory recognition	0.102211	{'alpha': 1, 'l1_ratio': 0}	RandomAtlas079_0_RandomAtlas079_0	79	RandomAtlas	-0.00524189	0.107453
287	Visual memory recognition	0.0800343	{'alpha': 1, 'l1_ratio': 0}	RandomAtlas079_1_RandomAtlas079_1	79	RandomAtlas	-0.00524189	0.0852762
288	Visual memory recognition	0.0894057	{'alpha': 1, 'l1_ratio': 0}	RandomAtlas079_2_RandomAtlas079_2	79	RandomAtlas	-0.00524189	0.0946475
289	Visual memory recognition	0.0965167	{'alpha': 1, 'l1_ratio': 0}	RandomAtlas079_3_RandomAtlas079_3	79	RandomAtlas	-0.00524189	0.101759
290	Visual memory recognition	0.0939541	{'alpha': 1, 'l1_ratio': 0}	RandomAtlas079_4_RandomAtlas079_4	79	RandomAtlas	-0.00524189	0.099196
291	Visual memory recognition	0.0924736	{'alpha': 1, 'l1_ratio': 0}	Random atlas 96	96	RandomAtlas	-0.00524189	0.0977155
292	Visual memory recognition	0.0631208	{'alpha': 1, 'l1_ratio': 0}	Random atlas 96	96	RandomAtlas	-0.00524189	0.0683626
293	Visual memory recognition	0.0594031	{'alpha': 0.5, 'l1_ratio': 0.2}	Random atlas 96	96	RandomAtlas	-0.00524189	0.064645
294	Visual memory recognition	0.088123	{'alpha': 1, 'l1_ratio': 0}	Random atlas 96	96	RandomAtlas	-0.00524189	0.0933649
295	Visual memory recognition	0.102281	{'alpha': 1, 'l1_ratio': 0}	Random atlas 96	96	RandomAtlas	-0.00524189	0.107523
296	Visual memory recognition	0.0497478	{'alpha': 1, 'l1_ratio': 0}	RandomAtlas100_0_RandomAtlas100_0	100	RandomAtlas	-0.00524189	0.0549896
297	Visual memory recognition	0.102133	{'alpha': 1, 'l1_ratio': 0}	RandomAtlas100_1_RandomAtlas100_1	100	RandomAtlas	-0.00524189	0.107375
298	Visual memory recognition	0.113957	{'alpha': 1, 'l1_ratio': 0}	RandomAtlas100_2_RandomAtlas100_2	100	RandomAtlas	-0.00524189	0.119198
299	Visual memory recognition	0.0919445	{'alpha': 1, 'l1_ratio': 0}	RandomAtlas100_3_RandomAtlas100_3	100	RandomAtlas	-0.00524189	0.0971864
300	Visual memory recognition	0.119797	{'alpha': 1, 'l1_ratio': 0}	RandomAtlas100_4_RandomAtlas100_4	100	RandomAtlas	-0.00524189	0.125039
301	Visual memory recognition	0.0983207	{'alpha': 1, 'l1_ratio': 0}	Random atlas 113	113	RandomAtlas	-0.00524189	0.103563
302	Visual memory recognition	0.0490578	{'alpha': 0.5, 'l1_ratio': 0.2}	Random atlas 113	113	RandomAtlas	-0.00524189	0.0542997
303	Visual memory recognition	0.0995952	{'alpha': 1, 'l1_ratio': 0}	Random atlas 113	113	RandomAtlas	-0.00524189	0.104837
304	Visual memory recognition	0.0692737	{'alpha': 1, 'l1_ratio': 0}	Random atlas 113	113	RandomAtlas	-0.00524189	0.0745156
305	Visual memory recognition	0.0514213	{'alpha': 0.5, 'l1_ratio': 0.2}	Random atlas 113	113	RandomAtlas	-0.00524189	0.0566632
306	Visual memory recognition	0.0790216	{'alpha': 1, 'l1_ratio': 0}	RandomAtlas116_0_RandomAtlas116_0	116	RandomAtlas	-0.00524189	0.0842635
307	Visual memory recognition	0.0634001	{'alpha': 0.5, 'l1_ratio': 0.2}	RandomAtlas116_1_RandomAtlas116_1	116	RandomAtlas	-0.00524189	0.068642
308	Visual memory recognition	0.0926658	{'alpha': 1, 'l1_ratio': 0}	RandomAtlas116_2_RandomAtlas116_2	116	RandomAtlas	-0.00524189	0.0979077
309	Visual memory recognition	0.0689909	{'alpha': 1, 'l1_ratio': 0}	RandomAtlas116_3_RandomAtlas116_3	116	RandomAtlas	-0.00524189	0.0742328
310	Visual memory recognition	0.114295	{'alpha': 1, 'l1_ratio': 0}	RandomAtlas116_4_RandomAtlas116_4	116	RandomAtlas	-0.00524189	0.119537
311	Visual memory recognition	0.0707906	{'alpha': 1, 'l1_ratio': 0}	RandomAtlas140_0_RandomAtlas140_0	140	RandomAtlas	-0.00524189	0.0760325
312	Visual memory recognition	0.0693957	{'alpha': 0.5, 'l1_ratio': 0.2}	RandomAtlas140_1_RandomAtlas140_1	140	RandomAtlas	-0.00524189	0.0746376
313	Visual memory recognition	0.101541	{'alpha': 1, 'l1_ratio': 0}	RandomAtlas140_2_RandomAtlas140_2	140	RandomAtlas	-0.00524189	0.106783
314	Visual memory recognition	0.0657391	{'alpha': 0.5, 'l1_ratio': 0.2}	RandomAtlas140_3_RandomAtlas140_3	140	RandomAtlas	-0.00524189	0.070981
315	Visual memory recognition	0.0928928	{'alpha': 1, 'l1_ratio': 0}	RandomAtlas140_4_RandomAtlas140_4	140	RandomAtlas	-0.00524189	0.0981347
316	Visual memory recognition	0.0516218	{'alpha': 0.5, 'l1_ratio': 0.2}	Random atlas 166	166	RandomAtlas	-0.00524189	0.0568637
317	Visual memory recognition	0.0679309	{'alpha': 0.5, 'l1_ratio': 0.2}	Random atlas 166	166	RandomAtlas	-0.00524189	0.0731728
318	Visual memory recognition	0.0384564	{'alpha': 0.8, 'l1_ratio': 0.2}	Random atlas 166	166	RandomAtlas	-0.00524189	0.0436983
319	Visual memory recognition	0.103129	{'alpha': 1, 'l1_ratio': 0}	Random atlas 166	166	RandomAtlas	-0.00524189	0.10837
320	Visual memory recognition	0.0908895	{'alpha': 1, 'l1_ratio': 0}	Random atlas 166	166	RandomAtlas	-0.00524189	0.0961314
321	Visual memory recognition	0.0637424	{'alpha': 0.5, 'l1_ratio': 0.2}	RandomAtlas169_0_RandomAtlas169_0	169	RandomAtlas	-0.00524189	0.0689843
322	Visual memory recognition	0.0976381	{'alpha': 0.5, 'l1_ratio': 0.2}	RandomAtlas169_1_RandomAtlas169_1	169	RandomAtlas	-0.00524189	0.10288
323	Visual memory recognition	0.0845888	{'alpha': 0.5, 'l1_ratio': 0.2}	RandomAtlas169_2_RandomAtlas169_2	169	RandomAtlas	-0.00524189	0.0898307
324	Visual memory recognition	0.0635453	{'alpha': 1, 'l1_ratio': 0}	RandomAtlas169_3_RandomAtlas169_3	169	RandomAtlas	-0.00524189	0.0687872
325	Visual memory recognition	0.00711956	{'alpha': 0.5, 'l1_ratio': 0.2}	RandomAtlas169_4_RandomAtlas169_4	169	RandomAtlas	-0.00524189	0.0123614
326	Visual memory recognition	0.0077157	{'alpha': 0.8, 'l1_ratio': 0.2}	Random atlas 200	200	RandomAtlas	-0.00524189	0.0129576
327	Visual memory recognition	0.0403136	{'alpha': 0.5, 'l1_ratio': 0.2}	Random atlas 200	200	RandomAtlas	-0.00524189	0.0455555
328	Visual memory recognition	0.0787999	{'alpha': 1, 'l1_ratio': 0}	Random atlas 200	200	RandomAtlas	-0.00524189	0.0840418
329	Visual memory recognition	0.0654193	{'alpha': 1, 'l1_ratio': 0}	Random atlas 200	200	RandomAtlas	-0.00524189	0.0706612
330	Visual memory recognition	0.0313569	{'alpha': 0.8, 'l1_ratio': 0.2}	Random atlas 200	200	RandomAtlas	-0.00524189	0.0365988
331	Visual memory recognition	0.0705636	{'alpha': 1, 'l1_ratio': 0}	RandomAtlas204_0_RandomAtlas204_0	204	RandomAtlas	-0.00524189	0.0758055
332	Visual memory recognition	0.0501022	{'alpha': 0.5, 'l1_ratio': 0.2}	RandomAtlas204_1_RandomAtlas204_1	204	RandomAtlas	-0.00524189	0.0553441
333	Visual memory recognition	0.0769734	{'alpha': 0.5, 'l1_ratio': 0.2}	RandomAtlas204_2_RandomAtlas204_2	204	RandomAtlas	-0.00524189	0.0822153
334	Visual memory recognition	0.0625105	{'alpha': 0.5, 'l1_ratio': 0.2}	RandomAtlas204_3_RandomAtlas204_3	204	RandomAtlas	-0.00524189	0.0677524
335	Visual memory recognition	0.0993472	{'alpha': 1, 'l1_ratio': 0}	RandomAtlas204_4_RandomAtlas204_4	204	RandomAtlas	-0.00524189	0.104589
336	Visual memory recognition	0.0795972	{'alpha': 0.5, 'l1_ratio': 0.2}	Random atlas 246	246	RandomAtlas	-0.00524189	0.0848391
337	Visual memory recognition	0.00234618	{'alpha': 0.5, 'l1_ratio': 0.2}	Random atlas 246	246	RandomAtlas	-0.00524189	0.00758806
338	Visual memory recognition	0.0328269	{'alpha': 0.8, 'l1_ratio': 0.2}	Random atlas 246	246	RandomAtlas	-0.00524189	0.0380688
339	Visual memory recognition	0.0465875	{'alpha': 0.5, 'l1_ratio': 0.2}	Random atlas 246	246	RandomAtlas	-0.00524189	0.0518294
340	Visual memory recognition	0.0644408	{'alpha': 0.5, 'l1_ratio': 0.2}	Random atlas 246	246	RandomAtlas	-0.00524189	0.0696826
341	Visual memory recognition	0.0888713	{'alpha': 0.5, 'l1_ratio': 0.2}	RandomAtlas298_0_RandomAtlas298_0	298	RandomAtlas	-0.00524189	0.0941132
342	Visual memory recognition	0.0945099	{'alpha': 1, 'l1_ratio': 0}	RandomAtlas298_1_RandomAtlas298_1	298	RandomAtlas	-0.00524189	0.0997518
343	Visual memory recognition	0.0345797	{'alpha': 0.2, 'l1_ratio': 1}	RandomAtlas298_2_RandomAtlas298_2	298	RandomAtlas	-0.00524189	0.0398216
344	Visual memory recognition	0.101372	{'alpha': 0.5, 'l1_ratio': 0.2}	RandomAtlas298_3_RandomAtlas298_3	298	RandomAtlas	-0.00524189	0.106614
345	Visual memory recognition	-0.00652804	{'alpha': 0.8, 'l1_ratio': 0.2}	RandomAtlas298_4_RandomAtlas298_4	298	RandomAtlas	-0.00524189	-0.00128616
346	Visual memory recognition	0.0448531	{'alpha': 0.2, 'l1_ratio': 1}	Random atlas 300	300	RandomAtlas	-0.00524189	0.050095
347	Visual memory recognition	0.0155275	{'alpha': 0.8, 'l1_ratio': 0.2}	Random atlas 300	300	RandomAtlas	-0.00524189	0.0207694
348	Visual memory recognition	0.0817634	{'alpha': 0.5, 'l1_ratio': 0.2}	Random atlas 300	300	RandomAtlas	-0.00524189	0.0870053
349	Visual memory recognition	0.0778326	{'alpha': 0.5, 'l1_ratio': 0.2}	Random atlas 300	300	RandomAtlas	-0.00524189	0.0830745
350	Visual memory recognition	0.0360006	{'alpha': 0.8, 'l1_ratio': 0.2}	Random atlas 300	300	RandomAtlas	-0.00524189	0.0412425
351	Visual memory recognition	0.104207	{'alpha': 1, 'l1_ratio': 0}	Random atlas 360	360	RandomAtlas	-0.00524189	0.109449
352	Visual memory recognition	0.0455913	{'alpha': 0.5, 'l1_ratio': 0.2}	Random atlas 360	360	RandomAtlas	-0.00524189	0.0508332
353	Visual memory recognition	0.0455881	{'alpha': 0.5, 'l1_ratio': 0.2}	Random atlas 360	360	RandomAtlas	-0.00524189	0.05083
354	Visual memory recognition	0.0222846	{'alpha': 0.8, 'l1_ratio': 0.2}	Random atlas 360	360	RandomAtlas	-0.00524189	0.0275264
355	Visual memory recognition	0.0346042	{'alpha': 1, 'l1_ratio': 0}	Random atlas 360	360	RandomAtlas	-0.00524189	0.0398461
356	Visual memory recognition	0.0875851	{'alpha': 0, 'l1_ratio': 0}	pca_2	2	pca	-0.00524189	0.0928269
357	Visual memory recognition	0.0708638	{'alpha': 0, 'l1_ratio': 0}	pca_3	3	pca	-0.00524189	0.0761057
358	Visual memory recognition	0.0833197	{'alpha': 0.2, 'l1_ratio': 0}	pca_7	7	pca	-0.00524189	0.0885616
359	Visual memory recognition	0.0840751	{'alpha': 0.2, 'l1_ratio': 0}	pca_9	9	pca	-0.00524189	0.0893169
360	Visual memory recognition	0.0731343	{'alpha': 0.2, 'l1_ratio': 0}	pca_10	10	pca	-0.00524189	0.0783762
361	Visual memory recognition	0.0628772	{'alpha': 0.5, 'l1_ratio': 0}	pca_12	12	pca	-0.00524189	0.0681191
362	Visual memory recognition	0.0814776	{'alpha': 0.5, 'l1_ratio': 0}	pca_14	14	pca	-0.00524189	0.0867195
363	Visual memory recognition	0.072736	{'alpha': 0.5, 'l1_ratio': 0}	pca_17	17	pca	-0.00524189	0.0779779
364	Visual memory recognition	0.0842677	{'alpha': 0.5, 'l1_ratio': 0}	pca_18	18	pca	-0.00524189	0.0895096
365	Visual memory recognition	0.0809503	{'alpha': 0.5, 'l1_ratio': 0}	pca_21	21	pca	-0.00524189	0.0861922
366	Visual memory recognition	0.0539694	{'alpha': 0.2, 'l1_ratio': 0.5}	pca_25	25	pca	-0.00524189	0.0592113
367	Visual memory recognition	0.0945861	{'alpha': 0.8, 'l1_ratio': 0}	pca_31	31	pca	-0.00524189	0.099828
368	Visual memory recognition	0.0888417	{'alpha': 0.8, 'l1_ratio': 0}	pca_37	37	pca	-0.00524189	0.0940836
369	Visual memory recognition	0.0676676	{'alpha': 1, 'l1_ratio': 0}	pca_45	45	pca	-0.00524189	0.0729095
370	Visual memory recognition	0.0447071	{'alpha': 0.5, 'l1_ratio': 0.2}	pca_54	54	pca	-0.00524189	0.049949
371	Visual memory recognition	0.0446615	{'alpha': 0.5, 'l1_ratio': 0.2}	pca_65	65	pca	-0.00524189	0.0499034
372	Visual memory recognition	0.0316741	{'alpha': 0.2, 'l1_ratio': 0.8}	pca_79	79	pca	-0.00524189	0.036916
373	Visual memory recognition	0.028158	{'alpha': 0.5, 'l1_ratio': 0.2}	pca_96	96	pca	-0.00524189	0.0333999
374	Visual memory recognition	0.0336153	{'alpha': 0.5, 'l1_ratio': 0.2}	pca_100	100	pca	-0.00524189	0.0388572
375	Visual memory recognition	0.0300857	{'alpha': 0.5, 'l1_ratio': 0.2}	pca_113	113	pca	-0.00524189	0.0353276
376	Visual memory recognition	0.0334836	{'alpha': 0.5, 'l1_ratio': 0.2}	pca_116	116	pca	-0.00524189	0.0387255
377	Visual memory recognition	0.0369464	{'alpha': 0.5, 'l1_ratio': 0.2}	pca_140	140	pca	-0.00524189	0.0421883
378	Visual memory recognition	-0.02837	{'alpha': 0.5, 'l1_ratio': 0.5}	pca_166	166	pca	-0.00524189	-0.0231281
379	Visual memory recognition	-0.0171866	{'alpha': 0.5, 'l1_ratio': 0.5}	pca_169	169	pca	-0.00524189	-0.0119448
380	Visual memory recognition	0.00188067	{'alpha': 0.5, 'l1_ratio': 0.5}	pca_200	200	pca	-0.00524189	0.00712256
381	Visual memory recognition	0.00188067	{'alpha': 0.5, 'l1_ratio': 0.5}	pca_204	204	pca	-0.00524189	0.00712256
382	Visual memory recognition	6.58142e-05	{'alpha': 0.5, 'l1_ratio': 0.5}	pca_246	246	pca	-0.00524189	0.0053077
383	Visual memory recognition	-0.0908175	{'alpha': 0.5, 'l1_ratio': 0.5}	pca_298	298	pca	-0.00524189	-0.0855756
384	Visual memory recognition	-0.0223377	{'alpha': 0.5, 'l1_ratio': 0.5}	pca_300	300	pca	-0.00524189	-0.0170958
385	Visual memory recognition	0.0111045	{'alpha': 0.5, 'l1_ratio': 0.5}	pca_360	360	pca	-0.00524189	0.0163464
386	Symbol digit coding task	0.0252704	{'alpha': 1, 'l1_ratio': 0}	Yeo 7 networks	7	atlas	0.052294	-0.0270236
387	Symbol digit coding task	0.0485938	{'alpha': 1, 'l1_ratio': 0}	Yeo 17 networks	17	atlas	0.052294	-0.00370021
388	Symbol digit coding task	0.0784492	{'alpha': 0.5, 'l1_ratio': 0}	MNI maxprob per hemisphere	18	atlas	0.052294	0.0261552
389	Symbol digit coding task	0.0459658	{'alpha': 0, 'l1_ratio': 0}	Hemisphere	2	atlas	0.052294	-0.00632822
390	Symbol digit coding task	0.0850372	{'alpha': 0.2, 'l1_ratio': 0.2}	MNI maxprob	9	atlas	0.052294	0.0327432
391	Symbol digit coding task	0.0444282	{'alpha': 0.5, 'l1_ratio': 0.2}	AAL3v1	166	atlas	0.052294	-0.00786576
392	Symbol digit coding task	-0.000365293	{'alpha': 0.8, 'l1_ratio': 0.2}	HarvardOxford	113	atlas	0.052294	-0.0526593
393	Symbol digit coding task	0.0323476	{'alpha': 0.5, 'l1_ratio': 0.2}	Brainnetome	246	atlas	0.052294	-0.0199463
394	Symbol digit coding task	0.0406662	{'alpha': 0.5, 'l1_ratio': 0.2}	OASIS DKT	96	atlas	0.052294	-0.0116278
395	Symbol digit coding task	0.0355907	{'alpha': 0.2, 'l1_ratio': 0.5}	MMP	360	atlas	0.052294	-0.0167033
396	Symbol digit coding task	0.0309583	{'alpha': 0.2, 'l1_ratio': 0.5}	Schaefer 100	100	atlas	0.052294	-0.0213357
397	Symbol digit coding task	-0.00296377	{'alpha': 0.8, 'l1_ratio': 0.2}	Schaefer 200	200	atlas	0.052294	-0.0552578
398	Symbol digit coding task	-0.0039132	{'alpha': 0.5, 'l1_ratio': 0.2}	Schaefer 300	300	atlas	0.052294	-0.0562072
399	Symbol digit coding task	0.0288456	{'alpha': 0, 'l1_ratio': 0}	RandomAtlas002_0_RandomAtlas002_0	2	RandomAtlas	0.052294	-0.0234484
400	Symbol digit coding task	0.0728073	{'alpha': 0, 'l1_ratio': 0}	RandomAtlas002_1_RandomAtlas002_1	2	RandomAtlas	0.052294	0.0205133
401	Symbol digit coding task	0.052378	{'alpha': 0, 'l1_ratio': 0}	RandomAtlas002_2_RandomAtlas002_2	2	RandomAtlas	0.052294	8.40184e-05
402	Symbol digit coding task	0.0305982	{'alpha': 0, 'l1_ratio': 0}	RandomAtlas002_3_RandomAtlas002_3	2	RandomAtlas	0.052294	-0.0216958
403	Symbol digit coding task	0.0550995	{'alpha': 0.2, 'l1_ratio': 0.2}	RandomAtlas002_4_RandomAtlas002_4	2	RandomAtlas	0.052294	0.00280551
404	Symbol digit coding task	0.0137053	{'alpha': 0.5, 'l1_ratio': 0}	Random atlas 3	3	RandomAtlas	0.052294	-0.0385886
405	Symbol digit coding task	0.0743374	{'alpha': 0, 'l1_ratio': 0}	Random atlas 3	3	RandomAtlas	0.052294	0.0220434
406	Symbol digit coding task	0.0330098	{'alpha': 0, 'l1_ratio': 0}	Random atlas 3	3	RandomAtlas	0.052294	-0.0192842
407	Symbol digit coding task	0.0463927	{'alpha': 0, 'l1_ratio': 0}	Random atlas 3	3	RandomAtlas	0.052294	-0.00590129
408	Symbol digit coding task	0.0846074	{'alpha': 0, 'l1_ratio': 0}	Random atlas 3	3	RandomAtlas	0.052294	0.0323134
409	Symbol digit coding task	0.0665329	{'alpha': 0.2, 'l1_ratio': 0.2}	Random atlas 7	7	RandomAtlas	0.052294	0.0142389
410	Symbol digit coding task	0.0730157	{'alpha': 0.2, 'l1_ratio': 0}	Random atlas 7	7	RandomAtlas	0.052294	0.0207217
411	Symbol digit coding task	0.0753909	{'alpha': 0.2, 'l1_ratio': 0.2}	Random atlas 7	7	RandomAtlas	0.052294	0.0230969
412	Symbol digit coding task	0.0863737	{'alpha': 0.2, 'l1_ratio': 0}	Random atlas 7	7	RandomAtlas	0.052294	0.0340798
413	Symbol digit coding task	0.0606589	{'alpha': 0.8, 'l1_ratio': 0}	Random atlas 7	7	RandomAtlas	0.052294	0.00836489
414	Symbol digit coding task	0.0874735	{'alpha': 0.2, 'l1_ratio': 0}	RandomAtlas009_0_RandomAtlas009_0	9	RandomAtlas	0.052294	0.0351795
415	Symbol digit coding task	0.046352	{'alpha': 0.2, 'l1_ratio': 0.5}	RandomAtlas009_1_RandomAtlas009_1	9	RandomAtlas	0.052294	-0.00594201
416	Symbol digit coding task	0.0586506	{'alpha': 0.2, 'l1_ratio': 0.2}	RandomAtlas009_2_RandomAtlas009_2	9	RandomAtlas	0.052294	0.00635665
417	Symbol digit coding task	0.0889207	{'alpha': 0.2, 'l1_ratio': 0.5}	RandomAtlas009_3_RandomAtlas009_3	9	RandomAtlas	0.052294	0.0366267
418	Symbol digit coding task	-0.01072	{'alpha': 0.2, 'l1_ratio': 0.5}	RandomAtlas009_4_RandomAtlas009_4	9	RandomAtlas	0.052294	-0.063014
419	Symbol digit coding task	0.0871063	{'alpha': 0.2, 'l1_ratio': 0.5}	RandomAtlas010_0_RandomAtlas010_0	10	RandomAtlas	0.052294	0.0348123
420	Symbol digit coding task	0.0701751	{'alpha': 0.8, 'l1_ratio': 0}	RandomAtlas010_1_RandomAtlas010_1	10	RandomAtlas	0.052294	0.0178811
421	Symbol digit coding task	0.0680973	{'alpha': 0.2, 'l1_ratio': 0.5}	RandomAtlas010_2_RandomAtlas010_2	10	RandomAtlas	0.052294	0.0158033
422	Symbol digit coding task	0.0145694	{'alpha': 0.2, 'l1_ratio': 0.2}	RandomAtlas010_3_RandomAtlas010_3	10	RandomAtlas	0.052294	-0.0377246
423	Symbol digit coding task	0.0561672	{'alpha': 0.5, 'l1_ratio': 0}	RandomAtlas010_4_RandomAtlas010_4	10	RandomAtlas	0.052294	0.00387318
424	Symbol digit coding task	0.0574525	{'alpha': 1, 'l1_ratio': 0}	Random atlas 12	12	RandomAtlas	0.052294	0.00515856
425	Symbol digit coding task	0.109866	{'alpha': 0.2, 'l1_ratio': 0.2}	Random atlas 12	12	RandomAtlas	0.052294	0.0575724
426	Symbol digit coding task	0.0916869	{'alpha': 0.2, 'l1_ratio': 0.5}	Random atlas 12	12	RandomAtlas	0.052294	0.0393929
427	Symbol digit coding task	0.0650841	{'alpha': 0.2, 'l1_ratio': 0}	Random atlas 12	12	RandomAtlas	0.052294	0.0127901
428	Symbol digit coding task	0.06281	{'alpha': 0.8, 'l1_ratio': 0}	Random atlas 12	12	RandomAtlas	0.052294	0.010516
429	Symbol digit coding task	0.0623467	{'alpha': 0.2, 'l1_ratio': 0.2}	RandomAtlas014_0_RandomAtlas014_0	14	RandomAtlas	0.052294	0.0100527
430	Symbol digit coding task	0.0663302	{'alpha': 0.5, 'l1_ratio': 0}	RandomAtlas014_1_RandomAtlas014_1	14	RandomAtlas	0.052294	0.0140362
431	Symbol digit coding task	0.0359764	{'alpha': 0.8, 'l1_ratio': 0}	RandomAtlas014_2_RandomAtlas014_2	14	RandomAtlas	0.052294	-0.0163176
432	Symbol digit coding task	0.0798507	{'alpha': 0.5, 'l1_ratio': 0}	RandomAtlas014_3_RandomAtlas014_3	14	RandomAtlas	0.052294	0.0275567
433	Symbol digit coding task	0.0452158	{'alpha': 0.2, 'l1_ratio': 0.5}	RandomAtlas014_4_RandomAtlas014_4	14	RandomAtlas	0.052294	-0.00707824
434	Symbol digit coding task	0.0597522	{'alpha': 1, 'l1_ratio': 0}	Random atlas 17	17	RandomAtlas	0.052294	0.00745824
435	Symbol digit coding task	0.0434332	{'alpha': 0.2, 'l1_ratio': 0.2}	Random atlas 17	17	RandomAtlas	0.052294	-0.00886075
436	Symbol digit coding task	0.104399	{'alpha': 0.2, 'l1_ratio': 0.5}	Random atlas 17	17	RandomAtlas	0.052294	0.0521045
437	Symbol digit coding task	0.0456253	{'alpha': 0.2, 'l1_ratio': 0.5}	Random atlas 17	17	RandomAtlas	0.052294	-0.00666868
438	Symbol digit coding task	0.0544026	{'alpha': 0.8, 'l1_ratio': 0}	Random atlas 17	17	RandomAtlas	0.052294	0.00210862
439	Symbol digit coding task	0.0360408	{'alpha': 0.2, 'l1_ratio': 0.5}	Random atlas 18	18	RandomAtlas	0.052294	-0.0162532
440	Symbol digit coding task	0.0543393	{'alpha': 1, 'l1_ratio': 0}	Random atlas 18	18	RandomAtlas	0.052294	0.00204535
441	Symbol digit coding task	0.069079	{'alpha': 0.8, 'l1_ratio': 0}	Random atlas 18	18	RandomAtlas	0.052294	0.0167851
442	Symbol digit coding task	0.0819741	{'alpha': 0.2, 'l1_ratio': 0.2}	Random atlas 18	18	RandomAtlas	0.052294	0.0296801
443	Symbol digit coding task	0.0494996	{'alpha': 0.8, 'l1_ratio': 0}	Random atlas 18	18	RandomAtlas	0.052294	-0.00279441
444	Symbol digit coding task	0.0580558	{'alpha': 0.2, 'l1_ratio': 0.5}	RandomAtlas021_0_RandomAtlas021_0	21	RandomAtlas	0.052294	0.00576183
445	Symbol digit coding task	0.0465397	{'alpha': 1, 'l1_ratio': 0}	RandomAtlas021_1_RandomAtlas021_1	21	RandomAtlas	0.052294	-0.00575428
446	Symbol digit coding task	0.103437	{'alpha': 0.2, 'l1_ratio': 0.2}	RandomAtlas021_2_RandomAtlas021_2	21	RandomAtlas	0.052294	0.0511427
447	Symbol digit coding task	0.0708091	{'alpha': 0.8, 'l1_ratio': 0}	RandomAtlas021_3_RandomAtlas021_3	21	RandomAtlas	0.052294	0.0185151
448	Symbol digit coding task	0.042325	{'alpha': 0.8, 'l1_ratio': 0}	RandomAtlas021_4_RandomAtlas021_4	21	RandomAtlas	0.052294	-0.00996897
449	Symbol digit coding task	0.043474	{'alpha': 1, 'l1_ratio': 0}	RandomAtlas025_0_RandomAtlas025_0	25	RandomAtlas	0.052294	-0.00882002
450	Symbol digit coding task	0.0371342	{'alpha': 0.5, 'l1_ratio': 0.2}	RandomAtlas025_1_RandomAtlas025_1	25	RandomAtlas	0.052294	-0.0151598
451	Symbol digit coding task	0.0783885	{'alpha': 0.2, 'l1_ratio': 0.5}	RandomAtlas025_2_RandomAtlas025_2	25	RandomAtlas	0.052294	0.0260946
452	Symbol digit coding task	0.045463	{'alpha': 0.5, 'l1_ratio': 0.2}	RandomAtlas025_3_RandomAtlas025_3	25	RandomAtlas	0.052294	-0.00683098
453	Symbol digit coding task	0.0627488	{'alpha': 0.5, 'l1_ratio': 0}	RandomAtlas025_4_RandomAtlas025_4	25	RandomAtlas	0.052294	0.0104548
454	Symbol digit coding task	0.0581001	{'alpha': 0.2, 'l1_ratio': 0.5}	RandomAtlas031_0_RandomAtlas031_0	31	RandomAtlas	0.052294	0.00580611
455	Symbol digit coding task	0.0661621	{'alpha': 0.2, 'l1_ratio': 0.5}	RandomAtlas031_1_RandomAtlas031_1	31	RandomAtlas	0.052294	0.0138681
456	Symbol digit coding task	0.00207475	{'alpha': 0.5, 'l1_ratio': 0.2}	RandomAtlas031_2_RandomAtlas031_2	31	RandomAtlas	0.052294	-0.0502192
457	Symbol digit coding task	0.062864	{'alpha': 0.2, 'l1_ratio': 0.8}	RandomAtlas031_3_RandomAtlas031_3	31	RandomAtlas	0.052294	0.01057
458	Symbol digit coding task	0.0503825	{'alpha': 1, 'l1_ratio': 0}	RandomAtlas031_4_RandomAtlas031_4	31	RandomAtlas	0.052294	-0.00191147
459	Symbol digit coding task	0.0628644	{'alpha': 1, 'l1_ratio': 0}	RandomAtlas037_0_RandomAtlas037_0	37	RandomAtlas	0.052294	0.0105705
460	Symbol digit coding task	0.0645267	{'alpha': 1, 'l1_ratio': 0}	RandomAtlas037_1_RandomAtlas037_1	37	RandomAtlas	0.052294	0.0122327
461	Symbol digit coding task	0.0409895	{'alpha': 0.5, 'l1_ratio': 0.2}	RandomAtlas037_2_RandomAtlas037_2	37	RandomAtlas	0.052294	-0.0113045
462	Symbol digit coding task	0.0419696	{'alpha': 0.2, 'l1_ratio': 0.5}	RandomAtlas037_3_RandomAtlas037_3	37	RandomAtlas	0.052294	-0.0103244
463	Symbol digit coding task	0.0522007	{'alpha': 0.5, 'l1_ratio': 0.2}	RandomAtlas037_4_RandomAtlas037_4	37	RandomAtlas	0.052294	-9.32984e-05
464	Symbol digit coding task	0.103532	{'alpha': 0.2, 'l1_ratio': 0.5}	RandomAtlas045_0_RandomAtlas045_0	45	RandomAtlas	0.052294	0.0512375
465	Symbol digit coding task	0.059773	{'alpha': 0.2, 'l1_ratio': 0.5}	RandomAtlas045_1_RandomAtlas045_1	45	RandomAtlas	0.052294	0.00747904
466	Symbol digit coding task	0.068009	{'alpha': 0.2, 'l1_ratio': 0.5}	RandomAtlas045_2_RandomAtlas045_2	45	RandomAtlas	0.052294	0.015715
467	Symbol digit coding task	0.051642	{'alpha': 0.2, 'l1_ratio': 0.5}	RandomAtlas045_3_RandomAtlas045_3	45	RandomAtlas	0.052294	-0.000652003
468	Symbol digit coding task	0.0761344	{'alpha': 1, 'l1_ratio': 0}	RandomAtlas045_4_RandomAtlas045_4	45	RandomAtlas	0.052294	0.0238404
469	Symbol digit coding task	0.0544617	{'alpha': 0.2, 'l1_ratio': 0.5}	RandomAtlas054_0_RandomAtlas054_0	54	RandomAtlas	0.052294	0.00216771
470	Symbol digit coding task	-0.03025	{'alpha': 0.2, 'l1_ratio': 1}	RandomAtlas054_1_RandomAtlas054_1	54	RandomAtlas	0.052294	-0.082544
471	Symbol digit coding task	0.0500636	{'alpha': 1, 'l1_ratio': 0}	RandomAtlas054_2_RandomAtlas054_2	54	RandomAtlas	0.052294	-0.00223041
472	Symbol digit coding task	0.0598817	{'alpha': 0.2, 'l1_ratio': 0.5}	RandomAtlas054_3_RandomAtlas054_3	54	RandomAtlas	0.052294	0.00758772
473	Symbol digit coding task	0.0469633	{'alpha': 1, 'l1_ratio': 0}	RandomAtlas054_4_RandomAtlas054_4	54	RandomAtlas	0.052294	-0.00533073
474	Symbol digit coding task	0.0480895	{'alpha': 0.5, 'l1_ratio': 0.2}	RandomAtlas065_0_RandomAtlas065_0	65	RandomAtlas	0.052294	-0.00420444
475	Symbol digit coding task	0.0652719	{'alpha': 1, 'l1_ratio': 0}	RandomAtlas065_1_RandomAtlas065_1	65	RandomAtlas	0.052294	0.0129779
476	Symbol digit coding task	0.0605087	{'alpha': 0.2, 'l1_ratio': 0.5}	RandomAtlas065_2_RandomAtlas065_2	65	RandomAtlas	0.052294	0.00821467
477	Symbol digit coding task	0.0459494	{'alpha': 0.5, 'l1_ratio': 0.2}	RandomAtlas065_3_RandomAtlas065_3	65	RandomAtlas	0.052294	-0.0063446
478	Symbol digit coding task	0.0614106	{'alpha': 0.5, 'l1_ratio': 0.2}	RandomAtlas065_4_RandomAtlas065_4	65	RandomAtlas	0.052294	0.00911661
479	Symbol digit coding task	0.00994846	{'alpha': 0.2, 'l1_ratio': 1}	RandomAtlas079_0_RandomAtlas079_0	79	RandomAtlas	0.052294	-0.0423455
480	Symbol digit coding task	0.0389843	{'alpha': 0.5, 'l1_ratio': 0.2}	RandomAtlas079_1_RandomAtlas079_1	79	RandomAtlas	0.052294	-0.0133097
481	Symbol digit coding task	0.0427396	{'alpha': 0.5, 'l1_ratio': 0.2}	RandomAtlas079_2_RandomAtlas079_2	79	RandomAtlas	0.052294	-0.00955435
482	Symbol digit coding task	0.0505261	{'alpha': 0.5, 'l1_ratio': 0.2}	RandomAtlas079_3_RandomAtlas079_3	79	RandomAtlas	0.052294	-0.00176789
483	Symbol digit coding task	0.00225604	{'alpha': 0.2, 'l1_ratio': 0.5}	RandomAtlas079_4_RandomAtlas079_4	79	RandomAtlas	0.052294	-0.050038
484	Symbol digit coding task	0.0725558	{'alpha': 0.2, 'l1_ratio': 0.5}	Random atlas 96	96	RandomAtlas	0.052294	0.0202618
485	Symbol digit coding task	0.00608649	{'alpha': 0.2, 'l1_ratio': 0.8}	Random atlas 96	96	RandomAtlas	0.052294	-0.0462075
486	Symbol digit coding task	0.0494167	{'alpha': 0.2, 'l1_ratio': 0.5}	Random atlas 96	96	RandomAtlas	0.052294	-0.00287729
487	Symbol digit coding task	0.0452957	{'alpha': 1, 'l1_ratio': 0}	Random atlas 96	96	RandomAtlas	0.052294	-0.00699827
488	Symbol digit coding task	0.0367286	{'alpha': 0.5, 'l1_ratio': 0.2}	Random atlas 96	96	RandomAtlas	0.052294	-0.0155654
489	Symbol digit coding task	0.0302225	{'alpha': 0.5, 'l1_ratio': 0.2}	RandomAtlas100_0_RandomAtlas100_0	100	RandomAtlas	0.052294	-0.0220715
490	Symbol digit coding task	0.0338112	{'alpha': 0.5, 'l1_ratio': 0.2}	RandomAtlas100_1_RandomAtlas100_1	100	RandomAtlas	0.052294	-0.0184828
491	Symbol digit coding task	0.0472675	{'alpha': 0.5, 'l1_ratio': 0.2}	RandomAtlas100_2_RandomAtlas100_2	100	RandomAtlas	0.052294	-0.00502653
492	Symbol digit coding task	0.0685259	{'alpha': 0.5, 'l1_ratio': 0.2}	RandomAtlas100_3_RandomAtlas100_3	100	RandomAtlas	0.052294	0.0162319
493	Symbol digit coding task	0.034032	{'alpha': 0.2, 'l1_ratio': 0.5}	RandomAtlas100_4_RandomAtlas100_4	100	RandomAtlas	0.052294	-0.0182619
494	Symbol digit coding task	0.055049	{'alpha': 0.2, 'l1_ratio': 0.5}	Random atlas 113	113	RandomAtlas	0.052294	0.00275499
495	Symbol digit coding task	-0.0226908	{'alpha': 0.8, 'l1_ratio': 0.2}	Random atlas 113	113	RandomAtlas	0.052294	-0.0749848
496	Symbol digit coding task	0.0500336	{'alpha': 0.5, 'l1_ratio': 0.2}	Random atlas 113	113	RandomAtlas	0.052294	-0.00226043
497	Symbol digit coding task	0.0272416	{'alpha': 0.5, 'l1_ratio': 0.2}	Random atlas 113	113	RandomAtlas	0.052294	-0.0250524
498	Symbol digit coding task	0.0625925	{'alpha': 0.2, 'l1_ratio': 0.5}	Random atlas 113	113	RandomAtlas	0.052294	0.0102985
499	Symbol digit coding task	0.0407201	{'alpha': 0.5, 'l1_ratio': 0.2}	RandomAtlas116_0_RandomAtlas116_0	116	RandomAtlas	0.052294	-0.0115739
500	Symbol digit coding task	0.0486788	{'alpha': 0.5, 'l1_ratio': 0.2}	RandomAtlas116_1_RandomAtlas116_1	116	RandomAtlas	0.052294	-0.00361522
501	Symbol digit coding task	0.00658731	{'alpha': 0.2, 'l1_ratio': 0.8}	RandomAtlas116_2_RandomAtlas116_2	116	RandomAtlas	0.052294	-0.0457067
502	Symbol digit coding task	0.051722	{'alpha': 0.5, 'l1_ratio': 0.2}	RandomAtlas116_3_RandomAtlas116_3	116	RandomAtlas	0.052294	-0.000571949
503	Symbol digit coding task	0.0322028	{'alpha': 0.5, 'l1_ratio': 0.2}	RandomAtlas116_4_RandomAtlas116_4	116	RandomAtlas	0.052294	-0.0200912
504	Symbol digit coding task	0.06689	{'alpha': 0.5, 'l1_ratio': 0.2}	RandomAtlas140_0_RandomAtlas140_0	140	RandomAtlas	0.052294	0.0145961
505	Symbol digit coding task	0.0416413	{'alpha': 0.5, 'l1_ratio': 0.2}	RandomAtlas140_1_RandomAtlas140_1	140	RandomAtlas	0.052294	-0.0106526
506	Symbol digit coding task	0.0460403	{'alpha': 0.5, 'l1_ratio': 0.2}	RandomAtlas140_2_RandomAtlas140_2	140	RandomAtlas	0.052294	-0.00625368
507	Symbol digit coding task	0.0475042	{'alpha': 0.5, 'l1_ratio': 0.2}	RandomAtlas140_3_RandomAtlas140_3	140	RandomAtlas	0.052294	-0.00478979
508	Symbol digit coding task	0.0357834	{'alpha': 0.5, 'l1_ratio': 0.2}	RandomAtlas140_4_RandomAtlas140_4	140	RandomAtlas	0.052294	-0.0165105
509	Symbol digit coding task	0.0378095	{'alpha': 0.5, 'l1_ratio': 0.2}	Random atlas 166	166	RandomAtlas	0.052294	-0.0144845
510	Symbol digit coding task	0.0227345	{'alpha': 0.5, 'l1_ratio': 0.2}	Random atlas 166	166	RandomAtlas	0.052294	-0.0295595
511	Symbol digit coding task	0.0439824	{'alpha': 0.5, 'l1_ratio': 0.2}	Random atlas 166	166	RandomAtlas	0.052294	-0.00831155
512	Symbol digit coding task	0.0305219	{'alpha': 0.2, 'l1_ratio': 0.5}	Random atlas 166	166	RandomAtlas	0.052294	-0.021772
513	Symbol digit coding task	0.035293	{'alpha': 0.8, 'l1_ratio': 0.2}	Random atlas 166	166	RandomAtlas	0.052294	-0.017001
514	Symbol digit coding task	0.040758	{'alpha': 0.2, 'l1_ratio': 0.5}	RandomAtlas169_0_RandomAtlas169_0	169	RandomAtlas	0.052294	-0.011536
515	Symbol digit coding task	0.0363503	{'alpha': 0.5, 'l1_ratio': 0.2}	RandomAtlas169_1_RandomAtlas169_1	169	RandomAtlas	0.052294	-0.0159437
516	Symbol digit coding task	0.0306302	{'alpha': 0.5, 'l1_ratio': 0.2}	RandomAtlas169_2_RandomAtlas169_2	169	RandomAtlas	0.052294	-0.0216638
517	Symbol digit coding task	0.0368071	{'alpha': 0.2, 'l1_ratio': 0.8}	RandomAtlas169_3_RandomAtlas169_3	169	RandomAtlas	0.052294	-0.0154869
518	Symbol digit coding task	0.0291167	{'alpha': 0.5, 'l1_ratio': 0.2}	RandomAtlas169_4_RandomAtlas169_4	169	RandomAtlas	0.052294	-0.0231773
519	Symbol digit coding task	0.052664	{'alpha': 0.5, 'l1_ratio': 0.2}	Random atlas 200	200	RandomAtlas	0.052294	0.00037
520	Symbol digit coding task	0.034871	{'alpha': 0.5, 'l1_ratio': 0.2}	Random atlas 200	200	RandomAtlas	0.052294	-0.017423
521	Symbol digit coding task	0.00888945	{'alpha': 0.2, 'l1_ratio': 1}	Random atlas 200	200	RandomAtlas	0.052294	-0.0434045
522	Symbol digit coding task	0.00611776	{'alpha': 0.8, 'l1_ratio': 0.2}	Random atlas 200	200	RandomAtlas	0.052294	-0.0461762
523	Symbol digit coding task	0.0510537	{'alpha': 0.5, 'l1_ratio': 0.2}	Random atlas 200	200	RandomAtlas	0.052294	-0.00124027
524	Symbol digit coding task	0.034611	{'alpha': 0.2, 'l1_ratio': 0.8}	RandomAtlas204_0_RandomAtlas204_0	204	RandomAtlas	0.052294	-0.017683
525	Symbol digit coding task	0.0408043	{'alpha': 0.5, 'l1_ratio': 0.2}	RandomAtlas204_1_RandomAtlas204_1	204	RandomAtlas	0.052294	-0.0114897
526	Symbol digit coding task	0.03541	{'alpha': 0.5, 'l1_ratio': 0.2}	RandomAtlas204_2_RandomAtlas204_2	204	RandomAtlas	0.052294	-0.016884
527	Symbol digit coding task	0.0242082	{'alpha': 0.5, 'l1_ratio': 0.2}	RandomAtlas204_3_RandomAtlas204_3	204	RandomAtlas	0.052294	-0.0280858
528	Symbol digit coding task	0.0436823	{'alpha': 0.5, 'l1_ratio': 0.2}	RandomAtlas204_4_RandomAtlas204_4	204	RandomAtlas	0.052294	-0.00861172
529	Symbol digit coding task	0.0419128	{'alpha': 0.2, 'l1_ratio': 0.5}	Random atlas 246	246	RandomAtlas	0.052294	-0.0103812
530	Symbol digit coding task	0.0361821	{'alpha': 0.5, 'l1_ratio': 0.2}	Random atlas 246	246	RandomAtlas	0.052294	-0.0161119
531	Symbol digit coding task	0.0202713	{'alpha': 0.8, 'l1_ratio': 0.2}	Random atlas 246	246	RandomAtlas	0.052294	-0.0320227
532	Symbol digit coding task	0.0283325	{'alpha': 0.5, 'l1_ratio': 0.2}	Random atlas 246	246	RandomAtlas	0.052294	-0.0239615
533	Symbol digit coding task	0.0443047	{'alpha': 0.5, 'l1_ratio': 0.2}	Random atlas 246	246	RandomAtlas	0.052294	-0.00798927
534	Symbol digit coding task	0.045199	{'alpha': 0.5, 'l1_ratio': 0.2}	RandomAtlas298_0_RandomAtlas298_0	298	RandomAtlas	0.052294	-0.00709499
535	Symbol digit coding task	0.0584066	{'alpha': 0.5, 'l1_ratio': 0.2}	RandomAtlas298_1_RandomAtlas298_1	298	RandomAtlas	0.052294	0.00611262
536	Symbol digit coding task	0.057733	{'alpha': 0.2, 'l1_ratio': 0.5}	RandomAtlas298_2_RandomAtlas298_2	298	RandomAtlas	0.052294	0.00543905
537	Symbol digit coding task	0.0331138	{'alpha': 0.5, 'l1_ratio': 0.2}	RandomAtlas298_3_RandomAtlas298_3	298	RandomAtlas	0.052294	-0.0191802
538	Symbol digit coding task	0.0463287	{'alpha': 0.5, 'l1_ratio': 0.2}	RandomAtlas298_4_RandomAtlas298_4	298	RandomAtlas	0.052294	-0.00596529
539	Symbol digit coding task	0.0111727	{'alpha': 0.8, 'l1_ratio': 0.2}	Random atlas 300	300	RandomAtlas	0.052294	-0.0411213
540	Symbol digit coding task	0.0266037	{'alpha': 0.2, 'l1_ratio': 0.5}	Random atlas 300	300	RandomAtlas	0.052294	-0.0256903
541	Symbol digit coding task	0.0274953	{'alpha': 0.5, 'l1_ratio': 0.2}	Random atlas 300	300	RandomAtlas	0.052294	-0.0247987
542	Symbol digit coding task	0.0539737	{'alpha': 0.5, 'l1_ratio': 0.2}	Random atlas 300	300	RandomAtlas	0.052294	0.00167971
543	Symbol digit coding task	0.0494435	{'alpha': 0.5, 'l1_ratio': 0.2}	Random atlas 300	300	RandomAtlas	0.052294	-0.00285051
544	Symbol digit coding task	0.0650974	{'alpha': 0.2, 'l1_ratio': 0.5}	Random atlas 360	360	RandomAtlas	0.052294	0.0128034
545	Symbol digit coding task	0.0465897	{'alpha': 0.2, 'l1_ratio': 0.5}	Random atlas 360	360	RandomAtlas	0.052294	-0.00570432
546	Symbol digit coding task	0.010962	{'alpha': 0.8, 'l1_ratio': 0.2}	Random atlas 360	360	RandomAtlas	0.052294	-0.041332
547	Symbol digit coding task	0.0283187	{'alpha': 0.5, 'l1_ratio': 0.2}	Random atlas 360	360	RandomAtlas	0.052294	-0.0239753
548	Symbol digit coding task	0.00740617	{'alpha': 0.2, 'l1_ratio': 1}	Random atlas 360	360	RandomAtlas	0.052294	-0.0448878
549	Symbol digit coding task	0.0456637	{'alpha': 0, 'l1_ratio': 0}	pca_2	2	pca	0.052294	-0.00663027
550	Symbol digit coding task	0.0532737	{'alpha': 0, 'l1_ratio': 0}	pca_3	3	pca	0.052294	0.000979683
551	Symbol digit coding task	0.102961	{'alpha': 0.2, 'l1_ratio': 0}	pca_7	7	pca	0.052294	0.050667
552	Symbol digit coding task	0.0864573	{'alpha': 0.2, 'l1_ratio': 0.2}	pca_9	9	pca	0.052294	0.0341633
553	Symbol digit coding task	0.0767296	{'alpha': 0.2, 'l1_ratio': 0.2}	pca_10	10	pca	0.052294	0.0244356
554	Symbol digit coding task	0.0623698	{'alpha': 0.2, 'l1_ratio': 0.5}	pca_12	12	pca	0.052294	0.0100758
555	Symbol digit coding task	0.0713861	{'alpha': 0.2, 'l1_ratio': 0.5}	pca_14	14	pca	0.052294	0.0190922
556	Symbol digit coding task	0.0751565	{'alpha': 0.2, 'l1_ratio': 0.5}	pca_17	17	pca	0.052294	0.0228625
557	Symbol digit coding task	0.0775607	{'alpha': 0.2, 'l1_ratio': 0.5}	pca_18	18	pca	0.052294	0.0252668
558	Symbol digit coding task	0.0650254	{'alpha': 0.2, 'l1_ratio': 0.5}	pca_21	21	pca	0.052294	0.0127314
559	Symbol digit coding task	0.0487296	{'alpha': 0.2, 'l1_ratio': 0.8}	pca_25	25	pca	0.052294	-0.00356439
560	Symbol digit coding task	0.0609571	{'alpha': 0.2, 'l1_ratio': 0.8}	pca_31	31	pca	0.052294	0.00866308
561	Symbol digit coding task	0.0595081	{'alpha': 0.2, 'l1_ratio': 0.8}	pca_37	37	pca	0.052294	0.0072141
562	Symbol digit coding task	0.0437736	{'alpha': 0.2, 'l1_ratio': 1}	pca_45	45	pca	0.052294	-0.0085204
563	Symbol digit coding task	0.047967	{'alpha': 0.2, 'l1_ratio': 1}	pca_54	54	pca	0.052294	-0.00432696
564	Symbol digit coding task	0.0400747	{'alpha': 0.2, 'l1_ratio': 1}	pca_65	65	pca	0.052294	-0.0122193
565	Symbol digit coding task	0.0395792	{'alpha': 0.2, 'l1_ratio': 1}	pca_79	79	pca	0.052294	-0.0127147
566	Symbol digit coding task	0.0514278	{'alpha': 0.2, 'l1_ratio': 1}	pca_96	96	pca	0.052294	-0.000866166
567	Symbol digit coding task	0.0519983	{'alpha': 0.2, 'l1_ratio': 1}	pca_100	100	pca	0.052294	-0.000295675
568	Symbol digit coding task	0.109752	{'alpha': 0.2, 'l1_ratio': 0.5}	pca_113	113	pca	0.052294	0.0574578
569	Symbol digit coding task	0.108041	{'alpha': 0.2, 'l1_ratio': 0.5}	pca_116	116	pca	0.052294	0.0557467
570	Symbol digit coding task	0.0804902	{'alpha': 0.2, 'l1_ratio': 0.5}	pca_140	140	pca	0.052294	0.0281962
571	Symbol digit coding task	0.0642073	{'alpha': 0.2, 'l1_ratio': 0.5}	pca_166	166	pca	0.052294	0.0119133
572	Symbol digit coding task	0.0542974	{'alpha': 0.2, 'l1_ratio': 0.5}	pca_169	169	pca	0.052294	0.00200344
573	Symbol digit coding task	0.0366178	{'alpha': 0.2, 'l1_ratio': 0.8}	pca_200	200	pca	0.052294	-0.0156761
574	Symbol digit coding task	0.0408398	{'alpha': 0.2, 'l1_ratio': 0.8}	pca_204	204	pca	0.052294	-0.0114542
575	Symbol digit coding task	0.0201058	{'alpha': 0.2, 'l1_ratio': 1}	pca_246	246	pca	0.052294	-0.0321882
576	Symbol digit coding task	0.0303763	{'alpha': 0.2, 'l1_ratio': 1}	pca_298	298	pca	0.052294	-0.0219177
577	Symbol digit coding task	0.0363593	{'alpha': 0.2, 'l1_ratio': 1}	pca_300	300	pca	0.052294	-0.0159347
578	Symbol digit coding task	-0.0296117	{'alpha': 0.2, 'l1_ratio': 1}	pca_360	360	pca	0.052294	-0.0819057
579	Simple reaction time	0.092397	{'alpha': 0.8, 'l1_ratio': 0}	Yeo 7 networks	7	atlas	0.0858299	0.00656708
580	Simple reaction time	0.104117	{'alpha': 0.2, 'l1_ratio': 1}	Yeo 17 networks	17	atlas	0.0858299	0.0182876
581	Simple reaction time	0.136847	{'alpha': 0.5, 'l1_ratio': 0.2}	MNI maxprob per hemisphere	18	atlas	0.0858299	0.0510169
582	Simple reaction time	0.132421	{'alpha': 0.2, 'l1_ratio': 1}	Hemisphere	2	atlas	0.0858299	0.0465914
583	Simple reaction time	0.0827383	{'alpha': 1, 'l1_ratio': 0}	MNI maxprob	9	atlas	0.0858299	-0.00309154
584	Simple reaction time	0.126536	{'alpha': 1, 'l1_ratio': 0.2}	AAL3v1	166	atlas	0.0858299	0.0407057
585	Simple reaction time	0.111217	{'alpha': 1, 'l1_ratio': 0.2}	HarvardOxford	113	atlas	0.0858299	0.0253867
586	Simple reaction time	0.0837888	{'alpha': 0.5, 'l1_ratio': 0.8}	Brainnetome	246	atlas	0.0858299	-0.00204109
587	Simple reaction time	0.121691	{'alpha': 0.5, 'l1_ratio': 0.5}	OASIS DKT	96	atlas	0.0858299	0.0358612
588	Simple reaction time	0.0955417	{'alpha': 0.5, 'l1_ratio': 0.8}	MMP	360	atlas	0.0858299	0.00971179
589	Simple reaction time	0.0945259	{'alpha': 1, 'l1_ratio': 0.2}	Schaefer 100	100	atlas	0.0858299	0.00869599
590	Simple reaction time	0.0944633	{'alpha': 1, 'l1_ratio': 0.2}	Schaefer 200	200	atlas	0.0858299	0.00863339
591	Simple reaction time	0.0871501	{'alpha': 0.8, 'l1_ratio': 0.5}	Schaefer 300	300	atlas	0.0858299	0.00132023
592	Simple reaction time	0.138968	{'alpha': 0.2, 'l1_ratio': 1}	RandomAtlas002_0_RandomAtlas002_0	2	RandomAtlas	0.0858299	0.0531384
593	Simple reaction time	0.0962157	{'alpha': 0.2, 'l1_ratio': 0}	RandomAtlas002_1_RandomAtlas002_1	2	RandomAtlas	0.0858299	0.0103858
594	Simple reaction time	0.139644	{'alpha': 0.2, 'l1_ratio': 0}	RandomAtlas002_2_RandomAtlas002_2	2	RandomAtlas	0.0858299	0.0538136
595	Simple reaction time	0.0830479	{'alpha': 0.5, 'l1_ratio': 0}	RandomAtlas002_3_RandomAtlas002_3	2	RandomAtlas	0.0858299	-0.00278202
596	Simple reaction time	0.115894	{'alpha': 0.2, 'l1_ratio': 1}	RandomAtlas002_4_RandomAtlas002_4	2	RandomAtlas	0.0858299	0.0300637
597	Simple reaction time	0.112527	{'alpha': 0.2, 'l1_ratio': 0.2}	Random atlas 3	3	RandomAtlas	0.0858299	0.0266969
598	Simple reaction time	0.0982762	{'alpha': 0.2, 'l1_ratio': 0.8}	Random atlas 3	3	RandomAtlas	0.0858299	0.0124463
599	Simple reaction time	0.131395	{'alpha': 0.2, 'l1_ratio': 0.5}	Random atlas 3	3	RandomAtlas	0.0858299	0.0455655
600	Simple reaction time	0.0811764	{'alpha': 0.5, 'l1_ratio': 0}	Random atlas 3	3	RandomAtlas	0.0858299	-0.00465345
601	Simple reaction time	0.10913	{'alpha': 0.5, 'l1_ratio': 0}	Random atlas 3	3	RandomAtlas	0.0858299	0.0232997
602	Simple reaction time	0.10738	{'alpha': 0.2, 'l1_ratio': 0.8}	Random atlas 7	7	RandomAtlas	0.0858299	0.0215501
603	Simple reaction time	0.109796	{'alpha': 0.5, 'l1_ratio': 0.2}	Random atlas 7	7	RandomAtlas	0.0858299	0.0239664
604	Simple reaction time	0.0961886	{'alpha': 0.5, 'l1_ratio': 0.8}	Random atlas 7	7	RandomAtlas	0.0858299	0.0103588
605	Simple reaction time	0.11643	{'alpha': 0.2, 'l1_ratio': 1}	Random atlas 7	7	RandomAtlas	0.0858299	0.0306
606	Simple reaction time	0.104034	{'alpha': 0.5, 'l1_ratio': 0}	Random atlas 7	7	RandomAtlas	0.0858299	0.0182042
607	Simple reaction time	0.102495	{'alpha': 0.8, 'l1_ratio': 0}	RandomAtlas009_0_RandomAtlas009_0	9	RandomAtlas	0.0858299	0.0166652
608	Simple reaction time	0.127778	{'alpha': 0.5, 'l1_ratio': 0}	RandomAtlas009_1_RandomAtlas009_1	9	RandomAtlas	0.0858299	0.0419483
609	Simple reaction time	0.106184	{'alpha': 0.5, 'l1_ratio': 0.2}	RandomAtlas009_2_RandomAtlas009_2	9	RandomAtlas	0.0858299	0.0203538
610	Simple reaction time	0.130714	{'alpha': 0.5, 'l1_ratio': 0}	RandomAtlas009_3_RandomAtlas009_3	9	RandomAtlas	0.0858299	0.0448843
611	Simple reaction time	0.105724	{'alpha': 0.5, 'l1_ratio': 0}	RandomAtlas009_4_RandomAtlas009_4	9	RandomAtlas	0.0858299	0.0198941
612	Simple reaction time	0.0934932	{'alpha': 0.2, 'l1_ratio': 1}	RandomAtlas010_0_RandomAtlas010_0	10	RandomAtlas	0.0858299	0.00766337
613	Simple reaction time	0.105119	{'alpha': 0.2, 'l1_ratio': 1}	RandomAtlas010_1_RandomAtlas010_1	10	RandomAtlas	0.0858299	0.019289
614	Simple reaction time	0.109398	{'alpha': 0.2, 'l1_ratio': 0.5}	RandomAtlas010_2_RandomAtlas010_2	10	RandomAtlas	0.0858299	0.0235681
615	Simple reaction time	0.108109	{'alpha': 0.5, 'l1_ratio': 0}	RandomAtlas010_3_RandomAtlas010_3	10	RandomAtlas	0.0858299	0.0222792
616	Simple reaction time	0.111888	{'alpha': 0.5, 'l1_ratio': 0}	RandomAtlas010_4_RandomAtlas010_4	10	RandomAtlas	0.0858299	0.026058
617	Simple reaction time	0.134311	{'alpha': 0.5, 'l1_ratio': 0.2}	Random atlas 12	12	RandomAtlas	0.0858299	0.0484812
618	Simple reaction time	0.159359	{'alpha': 0.2, 'l1_ratio': 1}	Random atlas 12	12	RandomAtlas	0.0858299	0.0735295
619	Simple reaction time	0.10241	{'alpha': 0.5, 'l1_ratio': 0.5}	Random atlas 12	12	RandomAtlas	0.0858299	0.0165801
620	Simple reaction time	0.132695	{'alpha': 0.2, 'l1_ratio': 0.5}	Random atlas 12	12	RandomAtlas	0.0858299	0.0468648
621	Simple reaction time	0.121908	{'alpha': 1, 'l1_ratio': 0}	Random atlas 12	12	RandomAtlas	0.0858299	0.0360783
622	Simple reaction time	0.119159	{'alpha': 0.5, 'l1_ratio': 0.2}	RandomAtlas014_0_RandomAtlas014_0	14	RandomAtlas	0.0858299	0.033329
623	Simple reaction time	0.0946284	{'alpha': 0.8, 'l1_ratio': 0}	RandomAtlas014_1_RandomAtlas014_1	14	RandomAtlas	0.0858299	0.00879852
624	Simple reaction time	0.0745453	{'alpha': 0.5, 'l1_ratio': 0.5}	RandomAtlas014_2_RandomAtlas014_2	14	RandomAtlas	0.0858299	-0.0112846
625	Simple reaction time	0.112513	{'alpha': 1, 'l1_ratio': 0}	RandomAtlas014_3_RandomAtlas014_3	14	RandomAtlas	0.0858299	0.0266835
626	Simple reaction time	0.0894705	{'alpha': 0.5, 'l1_ratio': 0.5}	RandomAtlas014_4_RandomAtlas014_4	14	RandomAtlas	0.0858299	0.00364063
627	Simple reaction time	0.136489	{'alpha': 1, 'l1_ratio': 0}	Random atlas 17	17	RandomAtlas	0.0858299	0.0506587
628	Simple reaction time	0.107123	{'alpha': 1, 'l1_ratio': 0}	Random atlas 17	17	RandomAtlas	0.0858299	0.0212926
629	Simple reaction time	0.100542	{'alpha': 0.2, 'l1_ratio': 1}	Random atlas 17	17	RandomAtlas	0.0858299	0.0147117
630	Simple reaction time	0.120388	{'alpha': 1, 'l1_ratio': 0}	Random atlas 17	17	RandomAtlas	0.0858299	0.0345582
631	Simple reaction time	0.116861	{'alpha': 1, 'l1_ratio': 0}	Random atlas 17	17	RandomAtlas	0.0858299	0.0310309
632	Simple reaction time	0.119168	{'alpha': 0.5, 'l1_ratio': 0}	Random atlas 18	18	RandomAtlas	0.0858299	0.0333377
633	Simple reaction time	0.0864513	{'alpha': 1, 'l1_ratio': 0}	Random atlas 18	18	RandomAtlas	0.0858299	0.000621468
634	Simple reaction time	0.130889	{'alpha': 1, 'l1_ratio': 0}	Random atlas 18	18	RandomAtlas	0.0858299	0.0450587
635	Simple reaction time	0.107684	{'alpha': 0.8, 'l1_ratio': 0}	Random atlas 18	18	RandomAtlas	0.0858299	0.0218541
636	Simple reaction time	0.110076	{'alpha': 0.5, 'l1_ratio': 0.2}	Random atlas 18	18	RandomAtlas	0.0858299	0.024246
637	Simple reaction time	0.0929266	{'alpha': 0.5, 'l1_ratio': 0.5}	RandomAtlas021_0_RandomAtlas021_0	21	RandomAtlas	0.0858299	0.00709668
638	Simple reaction time	0.11296	{'alpha': 1, 'l1_ratio': 0}	RandomAtlas021_1_RandomAtlas021_1	21	RandomAtlas	0.0858299	0.0271298
639	Simple reaction time	0.126492	{'alpha': 1, 'l1_ratio': 0}	RandomAtlas021_2_RandomAtlas021_2	21	RandomAtlas	0.0858299	0.0406617
640	Simple reaction time	0.121946	{'alpha': 0.2, 'l1_ratio': 0.8}	RandomAtlas021_3_RandomAtlas021_3	21	RandomAtlas	0.0858299	0.0361163
641	Simple reaction time	0.125219	{'alpha': 1, 'l1_ratio': 0}	RandomAtlas021_4_RandomAtlas021_4	21	RandomAtlas	0.0858299	0.039389
642	Simple reaction time	0.123011	{'alpha': 1, 'l1_ratio': 0}	RandomAtlas025_0_RandomAtlas025_0	25	RandomAtlas	0.0858299	0.0371807
643	Simple reaction time	0.085241	{'alpha': 1, 'l1_ratio': 0}	RandomAtlas025_1_RandomAtlas025_1	25	RandomAtlas	0.0858299	-0.000588835
644	Simple reaction time	0.0954152	{'alpha': 1, 'l1_ratio': 0}	RandomAtlas025_2_RandomAtlas025_2	25	RandomAtlas	0.0858299	0.00958536
645	Simple reaction time	0.111346	{'alpha': 0.5, 'l1_ratio': 0.5}	RandomAtlas025_3_RandomAtlas025_3	25	RandomAtlas	0.0858299	0.025516
646	Simple reaction time	0.132246	{'alpha': 0.8, 'l1_ratio': 0}	RandomAtlas025_4_RandomAtlas025_4	25	RandomAtlas	0.0858299	0.0464156
647	Simple reaction time	0.100104	{'alpha': 0.8, 'l1_ratio': 0.2}	RandomAtlas031_0_RandomAtlas031_0	31	RandomAtlas	0.0858299	0.0142745
648	Simple reaction time	0.0777614	{'alpha': 0.2, 'l1_ratio': 1}	RandomAtlas031_1_RandomAtlas031_1	31	RandomAtlas	0.0858299	-0.00806845
649	Simple reaction time	0.0969506	{'alpha': 0.8, 'l1_ratio': 0.2}	RandomAtlas031_2_RandomAtlas031_2	31	RandomAtlas	0.0858299	0.0111208
650	Simple reaction time	0.0686219	{'alpha': 1, 'l1_ratio': 0}	RandomAtlas031_3_RandomAtlas031_3	31	RandomAtlas	0.0858299	-0.017208
651	Simple reaction time	0.0874559	{'alpha': 0.5, 'l1_ratio': 0.5}	RandomAtlas031_4_RandomAtlas031_4	31	RandomAtlas	0.0858299	0.00162599
652	Simple reaction time	0.0752005	{'alpha': 0.5, 'l1_ratio': 0.2}	RandomAtlas037_0_RandomAtlas037_0	37	RandomAtlas	0.0858299	-0.0106293
653	Simple reaction time	0.104621	{'alpha': 0.2, 'l1_ratio': 1}	RandomAtlas037_1_RandomAtlas037_1	37	RandomAtlas	0.0858299	0.0187913
654	Simple reaction time	0.0998352	{'alpha': 1, 'l1_ratio': 0}	RandomAtlas037_2_RandomAtlas037_2	37	RandomAtlas	0.0858299	0.0140053
655	Simple reaction time	0.127561	{'alpha': 0.8, 'l1_ratio': 0}	RandomAtlas037_3_RandomAtlas037_3	37	RandomAtlas	0.0858299	0.041731
656	Simple reaction time	0.0908016	{'alpha': 0.5, 'l1_ratio': 0.8}	RandomAtlas037_4_RandomAtlas037_4	37	RandomAtlas	0.0858299	0.00497173
657	Simple reaction time	0.117708	{'alpha': 0.5, 'l1_ratio': 0.5}	RandomAtlas045_0_RandomAtlas045_0	45	RandomAtlas	0.0858299	0.0318783
658	Simple reaction time	0.104344	{'alpha': 1, 'l1_ratio': 0}	RandomAtlas045_1_RandomAtlas045_1	45	RandomAtlas	0.0858299	0.0185138
659	Simple reaction time	0.0785311	{'alpha': 1, 'l1_ratio': 0}	RandomAtlas045_2_RandomAtlas045_2	45	RandomAtlas	0.0858299	-0.00729875
660	Simple reaction time	0.102964	{'alpha': 0.8, 'l1_ratio': 0.2}	RandomAtlas045_3_RandomAtlas045_3	45	RandomAtlas	0.0858299	0.0171341
661	Simple reaction time	0.12372	{'alpha': 1, 'l1_ratio': 0}	RandomAtlas045_4_RandomAtlas045_4	45	RandomAtlas	0.0858299	0.0378902
662	Simple reaction time	0.0974546	{'alpha': 0.8, 'l1_ratio': 0.2}	RandomAtlas054_0_RandomAtlas054_0	54	RandomAtlas	0.0858299	0.0116247
663	Simple reaction time	0.0855179	{'alpha': 0.2, 'l1_ratio': 0.8}	RandomAtlas054_1_RandomAtlas054_1	54	RandomAtlas	0.0858299	-0.000311954
664	Simple reaction time	0.0844293	{'alpha': 0.5, 'l1_ratio': 0.5}	RandomAtlas054_2_RandomAtlas054_2	54	RandomAtlas	0.0858299	-0.00140062
665	Simple reaction time	0.0943516	{'alpha': 0.5, 'l1_ratio': 0.5}	RandomAtlas054_3_RandomAtlas054_3	54	RandomAtlas	0.0858299	0.00852174
666	Simple reaction time	0.0729525	{'alpha': 0.5, 'l1_ratio': 0.5}	RandomAtlas054_4_RandomAtlas054_4	54	RandomAtlas	0.0858299	-0.0128774
667	Simple reaction time	0.0995356	{'alpha': 0.5, 'l1_ratio': 0.5}	RandomAtlas065_0_RandomAtlas065_0	65	RandomAtlas	0.0858299	0.0137058
668	Simple reaction time	0.082282	{'alpha': 1, 'l1_ratio': 0.2}	RandomAtlas065_1_RandomAtlas065_1	65	RandomAtlas	0.0858299	-0.00354788
669	Simple reaction time	0.0919903	{'alpha': 0.5, 'l1_ratio': 0.5}	RandomAtlas065_2_RandomAtlas065_2	65	RandomAtlas	0.0858299	0.0061604
670	Simple reaction time	0.0947157	{'alpha': 1, 'l1_ratio': 0.2}	RandomAtlas065_3_RandomAtlas065_3	65	RandomAtlas	0.0858299	0.00888582
671	Simple reaction time	0.0959069	{'alpha': 0.8, 'l1_ratio': 0.2}	RandomAtlas065_4_RandomAtlas065_4	65	RandomAtlas	0.0858299	0.010077
672	Simple reaction time	0.0813349	{'alpha': 0.5, 'l1_ratio': 0.8}	RandomAtlas079_0_RandomAtlas079_0	79	RandomAtlas	0.0858299	-0.00449495
673	Simple reaction time	0.0831895	{'alpha': 0.8, 'l1_ratio': 0.2}	RandomAtlas079_1_RandomAtlas079_1	79	RandomAtlas	0.0858299	-0.00264042
674	Simple reaction time	0.0995145	{'alpha': 0.5, 'l1_ratio': 0.5}	RandomAtlas079_2_RandomAtlas079_2	79	RandomAtlas	0.0858299	0.0136846
675	Simple reaction time	0.0725603	{'alpha': 0.5, 'l1_ratio': 0.8}	RandomAtlas079_3_RandomAtlas079_3	79	RandomAtlas	0.0858299	-0.0132696
676	Simple reaction time	0.111688	{'alpha': 0.5, 'l1_ratio': 0.5}	RandomAtlas079_4_RandomAtlas079_4	79	RandomAtlas	0.0858299	0.0258585
677	Simple reaction time	0.0947145	{'alpha': 1, 'l1_ratio': 0.2}	Random atlas 96	96	RandomAtlas	0.0858299	0.00888464
678	Simple reaction time	0.0579817	{'alpha': 0.8, 'l1_ratio': 0.2}	Random atlas 96	96	RandomAtlas	0.0858299	-0.0278482
679	Simple reaction time	0.102714	{'alpha': 0.8, 'l1_ratio': 0.2}	Random atlas 96	96	RandomAtlas	0.0858299	0.0168837
680	Simple reaction time	0.0688323	{'alpha': 1, 'l1_ratio': 0.2}	Random atlas 96	96	RandomAtlas	0.0858299	-0.0169976
681	Simple reaction time	0.086445	{'alpha': 1, 'l1_ratio': 0.2}	Random atlas 96	96	RandomAtlas	0.0858299	0.000615155
682	Simple reaction time	0.103136	{'alpha': 0.5, 'l1_ratio': 0.8}	RandomAtlas100_0_RandomAtlas100_0	100	RandomAtlas	0.0858299	0.017306
683	Simple reaction time	0.128181	{'alpha': 0.8, 'l1_ratio': 0.2}	RandomAtlas100_1_RandomAtlas100_1	100	RandomAtlas	0.0858299	0.0423515
684	Simple reaction time	0.084114	{'alpha': 1, 'l1_ratio': 0.2}	RandomAtlas100_2_RandomAtlas100_2	100	RandomAtlas	0.0858299	-0.00171586
685	Simple reaction time	0.0992515	{'alpha': 0.5, 'l1_ratio': 0.5}	RandomAtlas100_3_RandomAtlas100_3	100	RandomAtlas	0.0858299	0.0134216
686	Simple reaction time	0.0732169	{'alpha': 0.5, 'l1_ratio': 0.5}	RandomAtlas100_4_RandomAtlas100_4	100	RandomAtlas	0.0858299	-0.012613
687	Simple reaction time	0.0979161	{'alpha': 1, 'l1_ratio': 0.2}	Random atlas 113	113	RandomAtlas	0.0858299	0.0120862
688	Simple reaction time	0.0931216	{'alpha': 1, 'l1_ratio': 0.2}	Random atlas 113	113	RandomAtlas	0.0858299	0.00729177
689	Simple reaction time	0.0873875	{'alpha': 1, 'l1_ratio': 0.2}	Random atlas 113	113	RandomAtlas	0.0858299	0.00155758
690	Simple reaction time	0.0682478	{'alpha': 0.5, 'l1_ratio': 0.5}	Random atlas 113	113	RandomAtlas	0.0858299	-0.017582
691	Simple reaction time	0.0853421	{'alpha': 1, 'l1_ratio': 0.2}	Random atlas 113	113	RandomAtlas	0.0858299	-0.000487783
692	Simple reaction time	0.0691972	{'alpha': 0.8, 'l1_ratio': 0.2}	RandomAtlas116_0_RandomAtlas116_0	116	RandomAtlas	0.0858299	-0.0166327
693	Simple reaction time	0.106271	{'alpha': 0.8, 'l1_ratio': 0.2}	RandomAtlas116_1_RandomAtlas116_1	116	RandomAtlas	0.0858299	0.0204414
694	Simple reaction time	0.0814234	{'alpha': 1, 'l1_ratio': 0.2}	RandomAtlas116_2_RandomAtlas116_2	116	RandomAtlas	0.0858299	-0.00440644
695	Simple reaction time	0.0942332	{'alpha': 0.5, 'l1_ratio': 0.8}	RandomAtlas116_3_RandomAtlas116_3	116	RandomAtlas	0.0858299	0.00840331
696	Simple reaction time	0.0636658	{'alpha': 0.5, 'l1_ratio': 0.8}	RandomAtlas116_4_RandomAtlas116_4	116	RandomAtlas	0.0858299	-0.022164
697	Simple reaction time	0.0934429	{'alpha': 1, 'l1_ratio': 0.2}	RandomAtlas140_0_RandomAtlas140_0	140	RandomAtlas	0.0858299	0.00761306
698	Simple reaction time	0.0927042	{'alpha': 1, 'l1_ratio': 0.2}	RandomAtlas140_1_RandomAtlas140_1	140	RandomAtlas	0.0858299	0.00687433
699	Simple reaction time	0.0722184	{'alpha': 1, 'l1_ratio': 0.2}	RandomAtlas140_2_RandomAtlas140_2	140	RandomAtlas	0.0858299	-0.0136115
700	Simple reaction time	0.0996589	{'alpha': 0.5, 'l1_ratio': 0.8}	RandomAtlas140_3_RandomAtlas140_3	140	RandomAtlas	0.0858299	0.013829
701	Simple reaction time	0.086589	{'alpha': 0.5, 'l1_ratio': 0.5}	RandomAtlas140_4_RandomAtlas140_4	140	RandomAtlas	0.0858299	0.000759109
702	Simple reaction time	0.0789464	{'alpha': 0.5, 'l1_ratio': 0.8}	Random atlas 166	166	RandomAtlas	0.0858299	-0.00688345
703	Simple reaction time	0.0862254	{'alpha': 1, 'l1_ratio': 0.2}	Random atlas 166	166	RandomAtlas	0.0858299	0.000395511
704	Simple reaction time	0.0953023	{'alpha': 1, 'l1_ratio': 0.2}	Random atlas 166	166	RandomAtlas	0.0858299	0.00947241
705	Simple reaction time	0.0917048	{'alpha': 1, 'l1_ratio': 0.2}	Random atlas 166	166	RandomAtlas	0.0858299	0.0058749
706	Simple reaction time	0.0910077	{'alpha': 1, 'l1_ratio': 0.2}	Random atlas 166	166	RandomAtlas	0.0858299	0.00517785
707	Simple reaction time	0.0783082	{'alpha': 0.8, 'l1_ratio': 0.5}	RandomAtlas169_0_RandomAtlas169_0	169	RandomAtlas	0.0858299	-0.0075217
708	Simple reaction time	0.0696708	{'alpha': 0.5, 'l1_ratio': 0.8}	RandomAtlas169_1_RandomAtlas169_1	169	RandomAtlas	0.0858299	-0.0161591
709	Simple reaction time	0.103062	{'alpha': 1, 'l1_ratio': 0.2}	RandomAtlas169_2_RandomAtlas169_2	169	RandomAtlas	0.0858299	0.0172317
710	Simple reaction time	0.101458	{'alpha': 0.5, 'l1_ratio': 0.5}	RandomAtlas169_3_RandomAtlas169_3	169	RandomAtlas	0.0858299	0.0156279
711	Simple reaction time	0.0796517	{'alpha': 0.5, 'l1_ratio': 0.8}	RandomAtlas169_4_RandomAtlas169_4	169	RandomAtlas	0.0858299	-0.00617822
712	Simple reaction time	0.102159	{'alpha': 0.5, 'l1_ratio': 0.8}	Random atlas 200	200	RandomAtlas	0.0858299	0.0163287
713	Simple reaction time	0.0713505	{'alpha': 0.5, 'l1_ratio': 0.8}	Random atlas 200	200	RandomAtlas	0.0858299	-0.0144794
714	Simple reaction time	0.095498	{'alpha': 1, 'l1_ratio': 0.2}	Random atlas 200	200	RandomAtlas	0.0858299	0.00966812
715	Simple reaction time	0.0902495	{'alpha': 1, 'l1_ratio': 0.2}	Random atlas 200	200	RandomAtlas	0.0858299	0.00441961
716	Simple reaction time	0.108609	{'alpha': 1, 'l1_ratio': 0.2}	Random atlas 200	200	RandomAtlas	0.0858299	0.0227795
717	Simple reaction time	0.0973121	{'alpha': 1, 'l1_ratio': 0.2}	RandomAtlas204_0_RandomAtlas204_0	204	RandomAtlas	0.0858299	0.0114822
718	Simple reaction time	0.0847519	{'alpha': 0.5, 'l1_ratio': 0.5}	RandomAtlas204_1_RandomAtlas204_1	204	RandomAtlas	0.0858299	-0.00107797
719	Simple reaction time	0.0698702	{'alpha': 0.5, 'l1_ratio': 0.8}	RandomAtlas204_2_RandomAtlas204_2	204	RandomAtlas	0.0858299	-0.0159597
720	Simple reaction time	0.0880178	{'alpha': 1, 'l1_ratio': 0.2}	RandomAtlas204_3_RandomAtlas204_3	204	RandomAtlas	0.0858299	0.00218793
721	Simple reaction time	0.0542035	{'alpha': 0.8, 'l1_ratio': 0.5}	RandomAtlas204_4_RandomAtlas204_4	204	RandomAtlas	0.0858299	-0.0316264
722	Simple reaction time	0.0898921	{'alpha': 1, 'l1_ratio': 0.2}	Random atlas 246	246	RandomAtlas	0.0858299	0.00406221
723	Simple reaction time	0.0913777	{'alpha': 0.8, 'l1_ratio': 0.5}	Random atlas 246	246	RandomAtlas	0.0858299	0.00554778
724	Simple reaction time	0.0917126	{'alpha': 1, 'l1_ratio': 0.2}	Random atlas 246	246	RandomAtlas	0.0858299	0.00588274
725	Simple reaction time	0.102814	{'alpha': 0.5, 'l1_ratio': 0.8}	Random atlas 246	246	RandomAtlas	0.0858299	0.0169837
726	Simple reaction time	0.0734727	{'alpha': 0.5, 'l1_ratio': 0.8}	Random atlas 246	246	RandomAtlas	0.0858299	-0.0123572
727	Simple reaction time	0.111115	{'alpha': 1, 'l1_ratio': 0.2}	RandomAtlas298_0_RandomAtlas298_0	298	RandomAtlas	0.0858299	0.0252851
728	Simple reaction time	0.0773	{'alpha': 0.8, 'l1_ratio': 0.5}	RandomAtlas298_1_RandomAtlas298_1	298	RandomAtlas	0.0858299	-0.00852992
729	Simple reaction time	0.105155	{'alpha': 1, 'l1_ratio': 0.2}	RandomAtlas298_2_RandomAtlas298_2	298	RandomAtlas	0.0858299	0.0193251
730	Simple reaction time	0.0836221	{'alpha': 0.5, 'l1_ratio': 0.8}	RandomAtlas298_3_RandomAtlas298_3	298	RandomAtlas	0.0858299	-0.00220773
731	Simple reaction time	0.0821651	{'alpha': 0.8, 'l1_ratio': 0.5}	RandomAtlas298_4_RandomAtlas298_4	298	RandomAtlas	0.0858299	-0.00366478
732	Simple reaction time	0.0965814	{'alpha': 0.5, 'l1_ratio': 0.5}	Random atlas 300	300	RandomAtlas	0.0858299	0.0107515
733	Simple reaction time	0.0910768	{'alpha': 0.5, 'l1_ratio': 0.8}	Random atlas 300	300	RandomAtlas	0.0858299	0.00524689
734	Simple reaction time	0.122152	{'alpha': 0.5, 'l1_ratio': 0.8}	Random atlas 300	300	RandomAtlas	0.0858299	0.0363224
735	Simple reaction time	0.0907814	{'alpha': 1, 'l1_ratio': 0.2}	Random atlas 300	300	RandomAtlas	0.0858299	0.00495153
736	Simple reaction time	0.0829166	{'alpha': 0.5, 'l1_ratio': 0.8}	Random atlas 300	300	RandomAtlas	0.0858299	-0.00291325
737	Simple reaction time	0.0913405	{'alpha': 0.5, 'l1_ratio': 0.8}	Random atlas 360	360	RandomAtlas	0.0858299	0.00551065
738	Simple reaction time	0.0541824	{'alpha': 0.8, 'l1_ratio': 0.5}	Random atlas 360	360	RandomAtlas	0.0858299	-0.0316475
739	Simple reaction time	0.0512595	{'alpha': 0.8, 'l1_ratio': 0.5}	Random atlas 360	360	RandomAtlas	0.0858299	-0.0345704
740	Simple reaction time	0.0951797	{'alpha': 1, 'l1_ratio': 0.2}	Random atlas 360	360	RandomAtlas	0.0858299	0.00934982
741	Simple reaction time	0.0885606	{'alpha': 1, 'l1_ratio': 0.2}	Random atlas 360	360	RandomAtlas	0.0858299	0.00273075
742	Simple reaction time	0.0825529	{'alpha': 0.2, 'l1_ratio': 0}	pca_2	2	pca	0.0858299	-0.00327699
743	Simple reaction time	0.0716406	{'alpha': 0.2, 'l1_ratio': 1}	pca_3	3	pca	0.0858299	-0.0141893
744	Simple reaction time	0.123917	{'alpha': 0.2, 'l1_ratio': 1}	pca_7	7	pca	0.0858299	0.0380871
745	Simple reaction time	0.146805	{'alpha': 0.2, 'l1_ratio': 1}	pca_9	9	pca	0.0858299	0.0609746
746	Simple reaction time	0.147765	{'alpha': 0.2, 'l1_ratio': 1}	pca_10	10	pca	0.0858299	0.0619354
747	Simple reaction time	0.147765	{'alpha': 0.2, 'l1_ratio': 1}	pca_12	12	pca	0.0858299	0.0619354
748	Simple reaction time	0.141071	{'alpha': 0.2, 'l1_ratio': 1}	pca_14	14	pca	0.0858299	0.0552408
749	Simple reaction time	0.142432	{'alpha': 0.2, 'l1_ratio': 1}	pca_17	17	pca	0.0858299	0.0566023
750	Simple reaction time	0.142432	{'alpha': 0.2, 'l1_ratio': 1}	pca_18	18	pca	0.0858299	0.0566023
751	Simple reaction time	0.126793	{'alpha': 0.2, 'l1_ratio': 1}	pca_21	21	pca	0.0858299	0.0409627
752	Simple reaction time	0.136066	{'alpha': 0.2, 'l1_ratio': 1}	pca_25	25	pca	0.0858299	0.0502361
753	Simple reaction time	0.111974	{'alpha': 0.2, 'l1_ratio': 1}	pca_31	31	pca	0.0858299	0.0261438
754	Simple reaction time	0.109849	{'alpha': 0.2, 'l1_ratio': 1}	pca_37	37	pca	0.0858299	0.0240195
755	Simple reaction time	0.137989	{'alpha': 0.5, 'l1_ratio': 0.5}	pca_45	45	pca	0.0858299	0.0521592
756	Simple reaction time	0.134095	{'alpha': 0.5, 'l1_ratio': 0.5}	pca_54	54	pca	0.0858299	0.0482656
757	Simple reaction time	0.140279	{'alpha': 0.5, 'l1_ratio': 0.5}	pca_65	65	pca	0.0858299	0.0544495
758	Simple reaction time	0.138204	{'alpha': 0.2, 'l1_ratio': 1}	pca_79	79	pca	0.0858299	0.0523741
759	Simple reaction time	0.121104	{'alpha': 0.2, 'l1_ratio': 1}	pca_96	96	pca	0.0858299	0.0352742
760	Simple reaction time	0.128753	{'alpha': 0.2, 'l1_ratio': 1}	pca_100	100	pca	0.0858299	0.0429234
761	Simple reaction time	0.133532	{'alpha': 0.5, 'l1_ratio': 0.5}	pca_113	113	pca	0.0858299	0.0477021
762	Simple reaction time	0.136302	{'alpha': 0.5, 'l1_ratio': 0.5}	pca_116	116	pca	0.0858299	0.0504725
763	Simple reaction time	0.136633	{'alpha': 0.2, 'l1_ratio': 1}	pca_140	140	pca	0.0858299	0.0508031
764	Simple reaction time	0.110727	{'alpha': 0.5, 'l1_ratio': 0.5}	pca_166	166	pca	0.0858299	0.024897
765	Simple reaction time	0.111211	{'alpha': 0.5, 'l1_ratio': 0.5}	pca_169	169	pca	0.0858299	0.025381
766	Simple reaction time	0.155542	{'alpha': 0.2, 'l1_ratio': 1}	pca_200	200	pca	0.0858299	0.0697121
767	Simple reaction time	0.157633	{'alpha': 0.2, 'l1_ratio': 1}	pca_204	204	pca	0.0858299	0.0718032
768	Simple reaction time	0.116239	{'alpha': 0.5, 'l1_ratio': 0.5}	pca_246	246	pca	0.0858299	0.0304094
769	Simple reaction time	0.113044	{'alpha': 0.5, 'l1_ratio': 0.8}	pca_298	298	pca	0.0858299	0.0272139
770	Simple reaction time	0.113044	{'alpha': 0.5, 'l1_ratio': 0.8}	pca_300	300	pca	0.0858299	0.0272139
771	Simple reaction time	0.123652	{'alpha': 0.5, 'l1_ratio': 0.5}	pca_360	360	pca	0.0858299	0.0378224
772	Stroop interference ratio	-0.0223476	{'alpha': 0.5, 'l1_ratio': 0.5}	Yeo 7 networks	7	atlas	-0.0090293	-0.0133183
773	Stroop interference ratio	-0.0090293	{'alpha': 0.5, 'l1_ratio': 0.8}	Yeo 17 networks	17	atlas	-0.0090293	0
774	Stroop interference ratio	-0.0090293	{'alpha': 0.5, 'l1_ratio': 0.8}	MNI maxprob per hemisphere	18	atlas	-0.0090293	0
775	Stroop interference ratio	-0.0158218	{'alpha': 0.5, 'l1_ratio': 0.5}	Hemisphere	2	atlas	-0.0090293	-0.00679246
776	Stroop interference ratio	-0.0090293	{'alpha': 0.5, 'l1_ratio': 0.8}	MNI maxprob	9	atlas	-0.0090293	0
777	Stroop interference ratio	-0.0090293	{'alpha': 0.5, 'l1_ratio': 0.8}	AAL3v1	166	atlas	-0.0090293	0
778	Stroop interference ratio	-0.0090293	{'alpha': 0.5, 'l1_ratio': 0.8}	HarvardOxford	113	atlas	-0.0090293	0
779	Stroop interference ratio	-0.0090293	{'alpha': 0.5, 'l1_ratio': 0.8}	Brainnetome	246	atlas	-0.0090293	0
780	Stroop interference ratio	-0.0090293	{'alpha': 0.5, 'l1_ratio': 0.8}	OASIS DKT	96	atlas	-0.0090293	0
781	Stroop interference ratio	-0.00499862	{'alpha': 0.2, 'l1_ratio': 1}	MMP	360	atlas	-0.0090293	0.00403068
782	Stroop interference ratio	-0.00891595	{'alpha': 0.5, 'l1_ratio': 0.8}	Schaefer 100	100	atlas	-0.0090293	0.000113348
783	Stroop interference ratio	-0.0090293	{'alpha': 0.5, 'l1_ratio': 0.8}	Schaefer 200	200	atlas	-0.0090293	0
784	Stroop interference ratio	-0.0090293	{'alpha': 0.5, 'l1_ratio': 0.8}	Schaefer 300	300	atlas	-0.0090293	0
785	Stroop interference ratio	-0.0111268	{'alpha': 0.5, 'l1_ratio': 0.5}	RandomAtlas002_0_RandomAtlas002_0	2	RandomAtlas	-0.0090293	-0.00209753
786	Stroop interference ratio	-0.0090293	{'alpha': 0.5, 'l1_ratio': 0.8}	RandomAtlas002_1_RandomAtlas002_1	2	RandomAtlas	-0.0090293	0
787	Stroop interference ratio	-0.0090293	{'alpha': 0.2, 'l1_ratio': 1}	RandomAtlas002_2_RandomAtlas002_2	2	RandomAtlas	-0.0090293	0
788	Stroop interference ratio	-0.0090293	{'alpha': 0.5, 'l1_ratio': 0.8}	RandomAtlas002_3_RandomAtlas002_3	2	RandomAtlas	-0.0090293	0
789	Stroop interference ratio	-0.0131869	{'alpha': 0.5, 'l1_ratio': 0.5}	RandomAtlas002_4_RandomAtlas002_4	2	RandomAtlas	-0.0090293	-0.00415755
790	Stroop interference ratio	-0.0090293	{'alpha': 0.5, 'l1_ratio': 0.8}	Random atlas 3	3	RandomAtlas	-0.0090293	0
791	Stroop interference ratio	-0.0090293	{'alpha': 0.5, 'l1_ratio': 0.5}	Random atlas 3	3	RandomAtlas	-0.0090293	0
792	Stroop interference ratio	-0.0090293	{'alpha': 0.5, 'l1_ratio': 0.5}	Random atlas 3	3	RandomAtlas	-0.0090293	0
793	Stroop interference ratio	-0.0090293	{'alpha': 0.5, 'l1_ratio': 0.8}	Random atlas 3	3	RandomAtlas	-0.0090293	0
794	Stroop interference ratio	-0.0090293	{'alpha': 0.5, 'l1_ratio': 0.5}	Random atlas 3	3	RandomAtlas	-0.0090293	0
795	Stroop interference ratio	-0.0189595	{'alpha': 0.5, 'l1_ratio': 0.8}	Random atlas 7	7	RandomAtlas	-0.0090293	-0.00993016
796	Stroop interference ratio	-0.0090293	{'alpha': 0.5, 'l1_ratio': 0.5}	Random atlas 7	7	RandomAtlas	-0.0090293	0
797	Stroop interference ratio	-0.0090293	{'alpha': 0.5, 'l1_ratio': 0.5}	Random atlas 7	7	RandomAtlas	-0.0090293	0
798	Stroop interference ratio	-0.0090293	{'alpha': 0.5, 'l1_ratio': 0.5}	Random atlas 7	7	RandomAtlas	-0.0090293	0
799	Stroop interference ratio	-0.0127367	{'alpha': 0.5, 'l1_ratio': 0.8}	Random atlas 7	7	RandomAtlas	-0.0090293	-0.00370736
800	Stroop interference ratio	-0.00899387	{'alpha': 0.5, 'l1_ratio': 0.5}	RandomAtlas009_0_RandomAtlas009_0	9	RandomAtlas	-0.0090293	3.54342e-05
801	Stroop interference ratio	-0.0090293	{'alpha': 0.5, 'l1_ratio': 0.8}	RandomAtlas009_1_RandomAtlas009_1	9	RandomAtlas	-0.0090293	0
802	Stroop interference ratio	-0.00913626	{'alpha': 0.5, 'l1_ratio': 0.5}	RandomAtlas009_2_RandomAtlas009_2	9	RandomAtlas	-0.0090293	-0.000106964
803	Stroop interference ratio	-0.0414861	{'alpha': 0.5, 'l1_ratio': 0.8}	RandomAtlas009_3_RandomAtlas009_3	9	RandomAtlas	-0.0090293	-0.0324568
804	Stroop interference ratio	-0.0090293	{'alpha': 0.5, 'l1_ratio': 0.5}	RandomAtlas009_4_RandomAtlas009_4	9	RandomAtlas	-0.0090293	0
805	Stroop interference ratio	-0.0119189	{'alpha': 0.5, 'l1_ratio': 0.8}	RandomAtlas010_0_RandomAtlas010_0	10	RandomAtlas	-0.0090293	-0.0028896
806	Stroop interference ratio	-0.0090293	{'alpha': 0.5, 'l1_ratio': 0.8}	RandomAtlas010_1_RandomAtlas010_1	10	RandomAtlas	-0.0090293	0
807	Stroop interference ratio	-0.0090293	{'alpha': 0.5, 'l1_ratio': 0.8}	RandomAtlas010_2_RandomAtlas010_2	10	RandomAtlas	-0.0090293	0
808	Stroop interference ratio	-0.0090293	{'alpha': 0.5, 'l1_ratio': 0.8}	RandomAtlas010_3_RandomAtlas010_3	10	RandomAtlas	-0.0090293	0
809	Stroop interference ratio	-0.0090293	{'alpha': 0.2, 'l1_ratio': 1}	RandomAtlas010_4_RandomAtlas010_4	10	RandomAtlas	-0.0090293	0
810	Stroop interference ratio	-0.0090293	{'alpha': 0.5, 'l1_ratio': 0.8}	Random atlas 12	12	RandomAtlas	-0.0090293	0
811	Stroop interference ratio	-0.0592939	{'alpha': 0.5, 'l1_ratio': 0.8}	Random atlas 12	12	RandomAtlas	-0.0090293	-0.0502646
812	Stroop interference ratio	-0.0090293	{'alpha': 0.5, 'l1_ratio': 0.8}	Random atlas 12	12	RandomAtlas	-0.0090293	0
813	Stroop interference ratio	-0.0090293	{'alpha': 0.5, 'l1_ratio': 0.5}	Random atlas 12	12	RandomAtlas	-0.0090293	0
814	Stroop interference ratio	-0.0090293	{'alpha': 0.5, 'l1_ratio': 0.8}	Random atlas 12	12	RandomAtlas	-0.0090293	0
815	Stroop interference ratio	-0.0090293	{'alpha': 0.5, 'l1_ratio': 0.5}	RandomAtlas014_0_RandomAtlas014_0	14	RandomAtlas	-0.0090293	0
816	Stroop interference ratio	-0.0090293	{'alpha': 0.5, 'l1_ratio': 0.8}	RandomAtlas014_1_RandomAtlas014_1	14	RandomAtlas	-0.0090293	0
817	Stroop interference ratio	-0.0090293	{'alpha': 0.5, 'l1_ratio': 0.5}	RandomAtlas014_2_RandomAtlas014_2	14	RandomAtlas	-0.0090293	0
818	Stroop interference ratio	-0.00952519	{'alpha': 0.2, 'l1_ratio': 0.8}	RandomAtlas014_3_RandomAtlas014_3	14	RandomAtlas	-0.0090293	-0.000495889
819	Stroop interference ratio	-0.015918	{'alpha': 0.5, 'l1_ratio': 0.8}	RandomAtlas014_4_RandomAtlas014_4	14	RandomAtlas	-0.0090293	-0.0068887
820	Stroop interference ratio	-0.0090293	{'alpha': 0.5, 'l1_ratio': 0.8}	Random atlas 17	17	RandomAtlas	-0.0090293	0
821	Stroop interference ratio	-0.0090293	{'alpha': 0.5, 'l1_ratio': 0.8}	Random atlas 17	17	RandomAtlas	-0.0090293	0
822	Stroop interference ratio	-0.0160833	{'alpha': 0.5, 'l1_ratio': 0.8}	Random atlas 17	17	RandomAtlas	-0.0090293	-0.00705397
823	Stroop interference ratio	-0.0090293	{'alpha': 0.5, 'l1_ratio': 0.8}	Random atlas 17	17	RandomAtlas	-0.0090293	0
824	Stroop interference ratio	-0.0090293	{'alpha': 0.5, 'l1_ratio': 0.5}	Random atlas 17	17	RandomAtlas	-0.0090293	0
825	Stroop interference ratio	-0.0090293	{'alpha': 0.5, 'l1_ratio': 0.8}	Random atlas 18	18	RandomAtlas	-0.0090293	0
826	Stroop interference ratio	-0.0090293	{'alpha': 0.5, 'l1_ratio': 0.8}	Random atlas 18	18	RandomAtlas	-0.0090293	0
827	Stroop interference ratio	-0.0090293	{'alpha': 0.5, 'l1_ratio': 0.8}	Random atlas 18	18	RandomAtlas	-0.0090293	0
828	Stroop interference ratio	-0.0169121	{'alpha': 0.5, 'l1_ratio': 0.8}	Random atlas 18	18	RandomAtlas	-0.0090293	-0.00788285
829	Stroop interference ratio	-0.0090293	{'alpha': 0.5, 'l1_ratio': 0.8}	Random atlas 18	18	RandomAtlas	-0.0090293	0
830	Stroop interference ratio	-0.0253887	{'alpha': 0.2, 'l1_ratio': 0.2}	RandomAtlas021_0_RandomAtlas021_0	21	RandomAtlas	-0.0090293	-0.0163594
831	Stroop interference ratio	-0.0090293	{'alpha': 0.5, 'l1_ratio': 0.8}	RandomAtlas021_1_RandomAtlas021_1	21	RandomAtlas	-0.0090293	0
832	Stroop interference ratio	-0.0090293	{'alpha': 0.5, 'l1_ratio': 0.8}	RandomAtlas021_2_RandomAtlas021_2	21	RandomAtlas	-0.0090293	0
833	Stroop interference ratio	-0.0090293	{'alpha': 0.5, 'l1_ratio': 0.8}	RandomAtlas021_3_RandomAtlas021_3	21	RandomAtlas	-0.0090293	0
834	Stroop interference ratio	-0.0090293	{'alpha': 0.5, 'l1_ratio': 0.5}	RandomAtlas021_4_RandomAtlas021_4	21	RandomAtlas	-0.0090293	0
835	Stroop interference ratio	-0.0090293	{'alpha': 0.5, 'l1_ratio': 0.8}	RandomAtlas025_0_RandomAtlas025_0	25	RandomAtlas	-0.0090293	0
836	Stroop interference ratio	-0.0483665	{'alpha': 0.8, 'l1_ratio': 0.2}	RandomAtlas025_1_RandomAtlas025_1	25	RandomAtlas	-0.0090293	-0.0393372
837	Stroop interference ratio	-0.0090293	{'alpha': 0.5, 'l1_ratio': 0.8}	RandomAtlas025_2_RandomAtlas025_2	25	RandomAtlas	-0.0090293	0
838	Stroop interference ratio	-0.0090293	{'alpha': 0.5, 'l1_ratio': 0.8}	RandomAtlas025_3_RandomAtlas025_3	25	RandomAtlas	-0.0090293	0
839	Stroop interference ratio	-0.010206	{'alpha': 0.5, 'l1_ratio': 0.5}	RandomAtlas025_4_RandomAtlas025_4	25	RandomAtlas	-0.0090293	-0.00117671
840	Stroop interference ratio	-0.0090293	{'alpha': 0.5, 'l1_ratio': 0.8}	RandomAtlas031_0_RandomAtlas031_0	31	RandomAtlas	-0.0090293	0
841	Stroop interference ratio	-0.0090293	{'alpha': 0.5, 'l1_ratio': 0.8}	RandomAtlas031_1_RandomAtlas031_1	31	RandomAtlas	-0.0090293	0
842	Stroop interference ratio	-0.0117186	{'alpha': 1, 'l1_ratio': 0.2}	RandomAtlas031_2_RandomAtlas031_2	31	RandomAtlas	-0.0090293	-0.00268926
843	Stroop interference ratio	-0.0090293	{'alpha': 0.5, 'l1_ratio': 0.8}	RandomAtlas031_3_RandomAtlas031_3	31	RandomAtlas	-0.0090293	0
844	Stroop interference ratio	-0.0216971	{'alpha': 0.2, 'l1_ratio': 0.5}	RandomAtlas031_4_RandomAtlas031_4	31	RandomAtlas	-0.0090293	-0.0126678
845	Stroop interference ratio	-0.0090293	{'alpha': 0.5, 'l1_ratio': 0.8}	RandomAtlas037_0_RandomAtlas037_0	37	RandomAtlas	-0.0090293	0
846	Stroop interference ratio	-0.0090293	{'alpha': 0.5, 'l1_ratio': 0.8}	RandomAtlas037_1_RandomAtlas037_1	37	RandomAtlas	-0.0090293	0
847	Stroop interference ratio	-0.0090293	{'alpha': 0.5, 'l1_ratio': 0.8}	RandomAtlas037_2_RandomAtlas037_2	37	RandomAtlas	-0.0090293	0
848	Stroop interference ratio	-0.0090293	{'alpha': 0.5, 'l1_ratio': 0.8}	RandomAtlas037_3_RandomAtlas037_3	37	RandomAtlas	-0.0090293	0
849	Stroop interference ratio	-0.0090293	{'alpha': 0.5, 'l1_ratio': 0.8}	RandomAtlas037_4_RandomAtlas037_4	37	RandomAtlas	-0.0090293	0
850	Stroop interference ratio	-0.0090293	{'alpha': 0.5, 'l1_ratio': 0.8}	RandomAtlas045_0_RandomAtlas045_0	45	RandomAtlas	-0.0090293	0
851	Stroop interference ratio	-0.0090293	{'alpha': 0.5, 'l1_ratio': 0.8}	RandomAtlas045_1_RandomAtlas045_1	45	RandomAtlas	-0.0090293	0
852	Stroop interference ratio	-0.0090293	{'alpha': 0.5, 'l1_ratio': 0.8}	RandomAtlas045_2_RandomAtlas045_2	45	RandomAtlas	-0.0090293	0
853	Stroop interference ratio	-0.0090293	{'alpha': 0.5, 'l1_ratio': 0.8}	RandomAtlas045_3_RandomAtlas045_3	45	RandomAtlas	-0.0090293	0
854	Stroop interference ratio	-0.0090293	{'alpha': 0.5, 'l1_ratio': 0.8}	RandomAtlas045_4_RandomAtlas045_4	45	RandomAtlas	-0.0090293	0
855	Stroop interference ratio	-0.0090293	{'alpha': 0.5, 'l1_ratio': 0.8}	RandomAtlas054_0_RandomAtlas054_0	54	RandomAtlas	-0.0090293	0
856	Stroop interference ratio	-0.0090293	{'alpha': 0.5, 'l1_ratio': 0.8}	RandomAtlas054_1_RandomAtlas054_1	54	RandomAtlas	-0.0090293	0
857	Stroop interference ratio	-0.0090293	{'alpha': 0.5, 'l1_ratio': 0.8}	RandomAtlas054_2_RandomAtlas054_2	54	RandomAtlas	-0.0090293	0
858	Stroop interference ratio	-0.0090293	{'alpha': 0.5, 'l1_ratio': 0.8}	RandomAtlas054_3_RandomAtlas054_3	54	RandomAtlas	-0.0090293	0
859	Stroop interference ratio	-0.0090293	{'alpha': 0.5, 'l1_ratio': 0.8}	RandomAtlas054_4_RandomAtlas054_4	54	RandomAtlas	-0.0090293	0
860	Stroop interference ratio	-0.0107308	{'alpha': 0.5, 'l1_ratio': 0.8}	RandomAtlas065_0_RandomAtlas065_0	65	RandomAtlas	-0.0090293	-0.00170147
861	Stroop interference ratio	-0.0090293	{'alpha': 0.5, 'l1_ratio': 0.8}	RandomAtlas065_1_RandomAtlas065_1	65	RandomAtlas	-0.0090293	0
862	Stroop interference ratio	-0.0130155	{'alpha': 0.5, 'l1_ratio': 0.8}	RandomAtlas065_2_RandomAtlas065_2	65	RandomAtlas	-0.0090293	-0.0039862
863	Stroop interference ratio	-0.0109254	{'alpha': 0.5, 'l1_ratio': 0.8}	RandomAtlas065_3_RandomAtlas065_3	65	RandomAtlas	-0.0090293	-0.00189609
864	Stroop interference ratio	-0.0090293	{'alpha': 0.5, 'l1_ratio': 0.8}	RandomAtlas065_4_RandomAtlas065_4	65	RandomAtlas	-0.0090293	0
865	Stroop interference ratio	-0.0090293	{'alpha': 0.5, 'l1_ratio': 0.8}	RandomAtlas079_0_RandomAtlas079_0	79	RandomAtlas	-0.0090293	0
866	Stroop interference ratio	-0.0191994	{'alpha': 0.5, 'l1_ratio': 0.8}	RandomAtlas079_1_RandomAtlas079_1	79	RandomAtlas	-0.0090293	-0.0101701
867	Stroop interference ratio	-0.0293372	{'alpha': 0.5, 'l1_ratio': 0.2}	RandomAtlas079_2_RandomAtlas079_2	79	RandomAtlas	-0.0090293	-0.0203079
868	Stroop interference ratio	-0.0090293	{'alpha': 0.5, 'l1_ratio': 0.8}	RandomAtlas079_3_RandomAtlas079_3	79	RandomAtlas	-0.0090293	0
869	Stroop interference ratio	-0.0090293	{'alpha': 0.5, 'l1_ratio': 0.8}	RandomAtlas079_4_RandomAtlas079_4	79	RandomAtlas	-0.0090293	0
870	Stroop interference ratio	-0.0090293	{'alpha': 0.5, 'l1_ratio': 0.8}	Random atlas 96	96	RandomAtlas	-0.0090293	0
871	Stroop interference ratio	-0.0345917	{'alpha': 0.5, 'l1_ratio': 0.2}	Random atlas 96	96	RandomAtlas	-0.0090293	-0.0255624
872	Stroop interference ratio	-0.00917491	{'alpha': 0.5, 'l1_ratio': 0.8}	Random atlas 96	96	RandomAtlas	-0.0090293	-0.000145611
873	Stroop interference ratio	-0.0090293	{'alpha': 0.5, 'l1_ratio': 0.8}	Random atlas 96	96	RandomAtlas	-0.0090293	0
874	Stroop interference ratio	-0.0090293	{'alpha': 0.5, 'l1_ratio': 0.8}	Random atlas 96	96	RandomAtlas	-0.0090293	0
875	Stroop interference ratio	-0.0101231	{'alpha': 0.5, 'l1_ratio': 1}	RandomAtlas100_0_RandomAtlas100_0	100	RandomAtlas	-0.0090293	-0.00109381
876	Stroop interference ratio	-0.0090293	{'alpha': 0.5, 'l1_ratio': 0.8}	RandomAtlas100_1_RandomAtlas100_1	100	RandomAtlas	-0.0090293	0
877	Stroop interference ratio	-0.0232434	{'alpha': 1, 'l1_ratio': 0.2}	RandomAtlas100_2_RandomAtlas100_2	100	RandomAtlas	-0.0090293	-0.0142141
878	Stroop interference ratio	-0.012759	{'alpha': 0.5, 'l1_ratio': 0.8}	RandomAtlas100_3_RandomAtlas100_3	100	RandomAtlas	-0.0090293	-0.00372971
879	Stroop interference ratio	-0.0090293	{'alpha': 0.5, 'l1_ratio': 0.8}	RandomAtlas100_4_RandomAtlas100_4	100	RandomAtlas	-0.0090293	0
880	Stroop interference ratio	-0.0090293	{'alpha': 0.5, 'l1_ratio': 0.8}	Random atlas 113	113	RandomAtlas	-0.0090293	0
881	Stroop interference ratio	-0.0090293	{'alpha': 0.5, 'l1_ratio': 0.8}	Random atlas 113	113	RandomAtlas	-0.0090293	0
882	Stroop interference ratio	-0.0090293	{'alpha': 0.5, 'l1_ratio': 0.8}	Random atlas 113	113	RandomAtlas	-0.0090293	0
883	Stroop interference ratio	-0.0090293	{'alpha': 0.5, 'l1_ratio': 0.8}	Random atlas 113	113	RandomAtlas	-0.0090293	0
884	Stroop interference ratio	-0.0090293	{'alpha': 0.5, 'l1_ratio': 0.8}	Random atlas 113	113	RandomAtlas	-0.0090293	0
885	Stroop interference ratio	-0.0090293	{'alpha': 0.5, 'l1_ratio': 0.8}	RandomAtlas116_0_RandomAtlas116_0	116	RandomAtlas	-0.0090293	0
886	Stroop interference ratio	-0.0090293	{'alpha': 0.5, 'l1_ratio': 0.8}	RandomAtlas116_1_RandomAtlas116_1	116	RandomAtlas	-0.0090293	0
887	Stroop interference ratio	-0.0123452	{'alpha': 0.5, 'l1_ratio': 1}	RandomAtlas116_2_RandomAtlas116_2	116	RandomAtlas	-0.0090293	-0.0033159
888	Stroop interference ratio	-0.00989398	{'alpha': 0.5, 'l1_ratio': 1}	RandomAtlas116_3_RandomAtlas116_3	116	RandomAtlas	-0.0090293	-0.000864678
889	Stroop interference ratio	-0.0105211	{'alpha': 0.5, 'l1_ratio': 0.8}	RandomAtlas116_4_RandomAtlas116_4	116	RandomAtlas	-0.0090293	-0.00149181
890	Stroop interference ratio	-0.0090293	{'alpha': 0.5, 'l1_ratio': 0.8}	RandomAtlas140_0_RandomAtlas140_0	140	RandomAtlas	-0.0090293	0
891	Stroop interference ratio	-0.0091582	{'alpha': 0.5, 'l1_ratio': 0.8}	RandomAtlas140_1_RandomAtlas140_1	140	RandomAtlas	-0.0090293	-0.000128901
892	Stroop interference ratio	-0.0090293	{'alpha': 0.5, 'l1_ratio': 0.8}	RandomAtlas140_2_RandomAtlas140_2	140	RandomAtlas	-0.0090293	0
893	Stroop interference ratio	-0.017215	{'alpha': 0.5, 'l1_ratio': 0.8}	RandomAtlas140_3_RandomAtlas140_3	140	RandomAtlas	-0.0090293	-0.00818574
894	Stroop interference ratio	-0.0090293	{'alpha': 0.5, 'l1_ratio': 0.8}	RandomAtlas140_4_RandomAtlas140_4	140	RandomAtlas	-0.0090293	0
895	Stroop interference ratio	-0.0090293	{'alpha': 0.5, 'l1_ratio': 1}	Random atlas 166	166	RandomAtlas	-0.0090293	0
896	Stroop interference ratio	-0.0368372	{'alpha': 0.5, 'l1_ratio': 1}	Random atlas 166	166	RandomAtlas	-0.0090293	-0.0278079
897	Stroop interference ratio	-0.0090293	{'alpha': 0.5, 'l1_ratio': 0.8}	Random atlas 166	166	RandomAtlas	-0.0090293	0
898	Stroop interference ratio	-0.0147421	{'alpha': 0.5, 'l1_ratio': 1}	Random atlas 166	166	RandomAtlas	-0.0090293	-0.00571279
899	Stroop interference ratio	-0.0130633	{'alpha': 0.5, 'l1_ratio': 0.8}	Random atlas 166	166	RandomAtlas	-0.0090293	-0.00403402
900	Stroop interference ratio	-0.0090293	{'alpha': 0.5, 'l1_ratio': 0.8}	RandomAtlas169_0_RandomAtlas169_0	169	RandomAtlas	-0.0090293	0
901	Stroop interference ratio	-0.0110821	{'alpha': 0.5, 'l1_ratio': 0.8}	RandomAtlas169_1_RandomAtlas169_1	169	RandomAtlas	-0.0090293	-0.00205276
902	Stroop interference ratio	-0.00849576	{'alpha': 0.5, 'l1_ratio': 0.8}	RandomAtlas169_2_RandomAtlas169_2	169	RandomAtlas	-0.0090293	0.000533538
903	Stroop interference ratio	-0.0090293	{'alpha': 0.5, 'l1_ratio': 1}	RandomAtlas169_3_RandomAtlas169_3	169	RandomAtlas	-0.0090293	0
904	Stroop interference ratio	-0.0090293	{'alpha': 0.5, 'l1_ratio': 1}	RandomAtlas169_4_RandomAtlas169_4	169	RandomAtlas	-0.0090293	0
905	Stroop interference ratio	-0.0131272	{'alpha': 0.5, 'l1_ratio': 1}	Random atlas 200	200	RandomAtlas	-0.0090293	-0.00409786
906	Stroop interference ratio	-0.0090293	{'alpha': 0.5, 'l1_ratio': 0.8}	Random atlas 200	200	RandomAtlas	-0.0090293	0
907	Stroop interference ratio	-0.0323208	{'alpha': 0.5, 'l1_ratio': 0.8}	Random atlas 200	200	RandomAtlas	-0.0090293	-0.0232915
908	Stroop interference ratio	-0.0090293	{'alpha': 0.5, 'l1_ratio': 1}	Random atlas 200	200	RandomAtlas	-0.0090293	0
909	Stroop interference ratio	-0.0193609	{'alpha': 0.2, 'l1_ratio': 0.8}	Random atlas 200	200	RandomAtlas	-0.0090293	-0.0103316
910	Stroop interference ratio	-0.0090293	{'alpha': 0.5, 'l1_ratio': 0.8}	RandomAtlas204_0_RandomAtlas204_0	204	RandomAtlas	-0.0090293	0
911	Stroop interference ratio	-0.0090293	{'alpha': 0.5, 'l1_ratio': 0.8}	RandomAtlas204_1_RandomAtlas204_1	204	RandomAtlas	-0.0090293	0
912	Stroop interference ratio	-0.0189694	{'alpha': 0.8, 'l1_ratio': 0.2}	RandomAtlas204_2_RandomAtlas204_2	204	RandomAtlas	-0.0090293	-0.0099401
913	Stroop interference ratio	-0.0090293	{'alpha': 0.5, 'l1_ratio': 1}	RandomAtlas204_3_RandomAtlas204_3	204	RandomAtlas	-0.0090293	0
914	Stroop interference ratio	-0.0090293	{'alpha': 0.5, 'l1_ratio': 0.8}	RandomAtlas204_4_RandomAtlas204_4	204	RandomAtlas	-0.0090293	0
915	Stroop interference ratio	-0.00531109	{'alpha': 0.5, 'l1_ratio': 0.5}	Random atlas 246	246	RandomAtlas	-0.0090293	0.00371821
916	Stroop interference ratio	-0.00914776	{'alpha': 0.5, 'l1_ratio': 1}	Random atlas 246	246	RandomAtlas	-0.0090293	-0.000118458
917	Stroop interference ratio	-0.0090293	{'alpha': 0.5, 'l1_ratio': 1}	Random atlas 246	246	RandomAtlas	-0.0090293	0
918	Stroop interference ratio	-0.0121566	{'alpha': 0.5, 'l1_ratio': 1}	Random atlas 246	246	RandomAtlas	-0.0090293	-0.00312734
919	Stroop interference ratio	-0.0107129	{'alpha': 0.5, 'l1_ratio': 1}	Random atlas 246	246	RandomAtlas	-0.0090293	-0.00168359
920	Stroop interference ratio	-0.0188546	{'alpha': 1, 'l1_ratio': 0.2}	RandomAtlas298_0_RandomAtlas298_0	298	RandomAtlas	-0.0090293	-0.00982527
921	Stroop interference ratio	-0.00989603	{'alpha': 0.5, 'l1_ratio': 0.8}	RandomAtlas298_1_RandomAtlas298_1	298	RandomAtlas	-0.0090293	-0.000866734
922	Stroop interference ratio	-0.0090293	{'alpha': 0.5, 'l1_ratio': 1}	RandomAtlas298_2_RandomAtlas298_2	298	RandomAtlas	-0.0090293	0
923	Stroop interference ratio	-0.0342157	{'alpha': 0.2, 'l1_ratio': 0.8}	RandomAtlas298_3_RandomAtlas298_3	298	RandomAtlas	-0.0090293	-0.0251864
924	Stroop interference ratio	-0.0143892	{'alpha': 0.2, 'l1_ratio': 1}	RandomAtlas298_4_RandomAtlas298_4	298	RandomAtlas	-0.0090293	-0.00535989
925	Stroop interference ratio	-0.00554169	{'alpha': 0.2, 'l1_ratio': 0.8}	Random atlas 300	300	RandomAtlas	-0.0090293	0.00348761
926	Stroop interference ratio	-0.0182899	{'alpha': 0.2, 'l1_ratio': 0.8}	Random atlas 300	300	RandomAtlas	-0.0090293	-0.00926065
927	Stroop interference ratio	-0.0090293	{'alpha': 0.5, 'l1_ratio': 0.8}	Random atlas 300	300	RandomAtlas	-0.0090293	0
928	Stroop interference ratio	-0.00972522	{'alpha': 0.5, 'l1_ratio': 1}	Random atlas 300	300	RandomAtlas	-0.0090293	-0.000695922
929	Stroop interference ratio	-0.00921022	{'alpha': 0.2, 'l1_ratio': 0.8}	Random atlas 300	300	RandomAtlas	-0.0090293	-0.000180918
930	Stroop interference ratio	-0.00865227	{'alpha': 0.5, 'l1_ratio': 0.8}	Random atlas 360	360	RandomAtlas	-0.0090293	0.000377029
931	Stroop interference ratio	-0.00912689	{'alpha': 1, 'l1_ratio': 0.2}	Random atlas 360	360	RandomAtlas	-0.0090293	-9.75903e-05
932	Stroop interference ratio	-0.0144983	{'alpha': 0.5, 'l1_ratio': 1}	Random atlas 360	360	RandomAtlas	-0.0090293	-0.00546898
933	Stroop interference ratio	-0.0128088	{'alpha': 0.5, 'l1_ratio': 0.8}	Random atlas 360	360	RandomAtlas	-0.0090293	-0.00377953
934	Stroop interference ratio	-0.0111743	{'alpha': 0.5, 'l1_ratio': 1}	Random atlas 360	360	RandomAtlas	-0.0090293	-0.00214503
935	Stroop interference ratio	-0.0090293	{'alpha': 0.2, 'l1_ratio': 1}	pca_2	2	pca	-0.0090293	0
936	Stroop interference ratio	-0.0090293	{'alpha': 0.2, 'l1_ratio': 1}	pca_3	3	pca	-0.0090293	0
937	Stroop interference ratio	-0.0092305	{'alpha': 0.2, 'l1_ratio': 1}	pca_7	7	pca	-0.0090293	-0.0002012
938	Stroop interference ratio	-0.0092305	{'alpha': 0.2, 'l1_ratio': 1}	pca_9	9	pca	-0.0090293	-0.0002012
939	Stroop interference ratio	-0.0090293	{'alpha': 0.5, 'l1_ratio': 0.8}	pca_10	10	pca	-0.0090293	0
940	Stroop interference ratio	-0.0090293	{'alpha': 0.5, 'l1_ratio': 0.8}	pca_12	12	pca	-0.0090293	0
941	Stroop interference ratio	-0.0090293	{'alpha': 0.5, 'l1_ratio': 0.8}	pca_14	14	pca	-0.0090293	0
942	Stroop interference ratio	-0.0090293	{'alpha': 0.5, 'l1_ratio': 0.8}	pca_17	17	pca	-0.0090293	0
943	Stroop interference ratio	-0.0090293	{'alpha': 0.5, 'l1_ratio': 0.8}	pca_18	18	pca	-0.0090293	0
944	Stroop interference ratio	-0.0090293	{'alpha': 0.5, 'l1_ratio': 0.8}	pca_21	21	pca	-0.0090293	0
945	Stroop interference ratio	-0.0090293	{'alpha': 0.5, 'l1_ratio': 0.8}	pca_25	25	pca	-0.0090293	0
946	Stroop interference ratio	-0.0090293	{'alpha': 0.5, 'l1_ratio': 0.8}	pca_31	31	pca	-0.0090293	0
947	Stroop interference ratio	-0.0090293	{'alpha': 0.5, 'l1_ratio': 0.8}	pca_37	37	pca	-0.0090293	0
948	Stroop interference ratio	-0.0090293	{'alpha': 0.5, 'l1_ratio': 0.8}	pca_45	45	pca	-0.0090293	0
949	Stroop interference ratio	-0.0090293	{'alpha': 0.5, 'l1_ratio': 0.8}	pca_54	54	pca	-0.0090293	0
950	Stroop interference ratio	-0.0090293	{'alpha': 0.5, 'l1_ratio': 0.8}	pca_65	65	pca	-0.0090293	0
951	Stroop interference ratio	-0.0090293	{'alpha': 0.5, 'l1_ratio': 0.8}	pca_79	79	pca	-0.0090293	0
952	Stroop interference ratio	-0.0090293	{'alpha': 0.5, 'l1_ratio': 0.8}	pca_96	96	pca	-0.0090293	0
953	Stroop interference ratio	-0.0090293	{'alpha': 0.5, 'l1_ratio': 0.8}	pca_100	100	pca	-0.0090293	0
954	Stroop interference ratio	-0.0090293	{'alpha': 0.5, 'l1_ratio': 0.8}	pca_113	113	pca	-0.0090293	0
955	Stroop interference ratio	-0.0090293	{'alpha': 0.5, 'l1_ratio': 0.8}	pca_116	116	pca	-0.0090293	0
956	Stroop interference ratio	-0.0090293	{'alpha': 0.5, 'l1_ratio': 0.8}	pca_140	140	pca	-0.0090293	0
957	Stroop interference ratio	-0.0090293	{'alpha': 0.5, 'l1_ratio': 0.8}	pca_166	166	pca	-0.0090293	0
958	Stroop interference ratio	-0.0090293	{'alpha': 0.5, 'l1_ratio': 0.8}	pca_169	169	pca	-0.0090293	0
959	Stroop interference ratio	-0.0090293	{'alpha': 0.5, 'l1_ratio': 0.8}	pca_200	200	pca	-0.0090293	0
960	Stroop interference ratio	-0.0090293	{'alpha': 0.5, 'l1_ratio': 0.8}	pca_204	204	pca	-0.0090293	0
961	Stroop interference ratio	-0.0102612	{'alpha': 0.5, 'l1_ratio': 0.8}	pca_246	246	pca	-0.0090293	-0.00123187
962	Stroop interference ratio	0.0253817	{'alpha': 0.5, 'l1_ratio': 0.5}	pca_298	298	pca	-0.0090293	0.034411
963	Stroop interference ratio	0.0253817	{'alpha': 0.5, 'l1_ratio': 0.5}	pca_300	300	pca	-0.0090293	0.034411
964	Stroop interference ratio	0.0253805	{'alpha': 0.5, 'l1_ratio': 0.5}	pca_360	360	pca	-0.0090293	0.0344098
965	Continuous performance task	0.0174965	{'alpha': 0.5, 'l1_ratio': 0}	Yeo 7 networks	7	atlas	0.0333285	-0.0158321
966	Continuous performance task	0.0402012	{'alpha': 1, 'l1_ratio': 0}	Yeo 17 networks	17	atlas	0.0333285	0.00687266
967	Continuous performance task	0.0355746	{'alpha': 0.2, 'l1_ratio': 0.5}	MNI maxprob per hemisphere	18	atlas	0.0333285	0.00224605
968	Continuous performance task	0.0671752	{'alpha': 0.2, 'l1_ratio': 0.5}	Hemisphere	2	atlas	0.0333285	0.0338466
969	Continuous performance task	-0.00323595	{'alpha': 1, 'l1_ratio': 0}	MNI maxprob	9	atlas	0.0333285	-0.0365645
970	Continuous performance task	-0.008315	{'alpha': 0.8, 'l1_ratio': 0.2}	AAL3v1	166	atlas	0.0333285	-0.0416435
971	Continuous performance task	-0.00457369	{'alpha': 0.2, 'l1_ratio': 0.8}	HarvardOxford	113	atlas	0.0333285	-0.0379022
972	Continuous performance task	0.0266462	{'alpha': 0.2, 'l1_ratio': 0.5}	Brainnetome	246	atlas	0.0333285	-0.00668233
973	Continuous performance task	-0.0104902	{'alpha': 0.8, 'l1_ratio': 0.2}	OASIS DKT	96	atlas	0.0333285	-0.0438187
974	Continuous performance task	0.0227286	{'alpha': 0.2, 'l1_ratio': 1}	MMP	360	atlas	0.0333285	-0.0105999
975	Continuous performance task	-0.00487054	{'alpha': 1, 'l1_ratio': 0}	Schaefer 100	100	atlas	0.0333285	-0.0381991
976	Continuous performance task	0.0635994	{'alpha': 0.2, 'l1_ratio': 0.5}	Schaefer 200	200	atlas	0.0333285	0.0302708
977	Continuous performance task	0.0338793	{'alpha': 0.5, 'l1_ratio': 0.2}	Schaefer 300	300	atlas	0.0333285	0.000550732
978	Continuous performance task	0.0522489	{'alpha': 0.2, 'l1_ratio': 0.2}	RandomAtlas002_0_RandomAtlas002_0	2	RandomAtlas	0.0333285	0.0189203
979	Continuous performance task	0.0156752	{'alpha': 0.2, 'l1_ratio': 0}	RandomAtlas002_1_RandomAtlas002_1	2	RandomAtlas	0.0333285	-0.0176533
980	Continuous performance task	0.0319831	{'alpha': 0.2, 'l1_ratio': 0}	RandomAtlas002_2_RandomAtlas002_2	2	RandomAtlas	0.0333285	-0.00134538
981	Continuous performance task	0.0179552	{'alpha': 0.2, 'l1_ratio': 0.8}	RandomAtlas002_3_RandomAtlas002_3	2	RandomAtlas	0.0333285	-0.0153733
982	Continuous performance task	0.0611667	{'alpha': 0.2, 'l1_ratio': 0.2}	RandomAtlas002_4_RandomAtlas002_4	2	RandomAtlas	0.0333285	0.0278382
983	Continuous performance task	0.0290217	{'alpha': 0.5, 'l1_ratio': 0}	Random atlas 3	3	RandomAtlas	0.0333285	-0.00430681
984	Continuous performance task	0.0366846	{'alpha': 0.5, 'l1_ratio': 0}	Random atlas 3	3	RandomAtlas	0.0333285	0.00335611
985	Continuous performance task	0.0408279	{'alpha': 0.5, 'l1_ratio': 0}	Random atlas 3	3	RandomAtlas	0.0333285	0.00749942
986	Continuous performance task	0.0485559	{'alpha': 0.2, 'l1_ratio': 0.2}	Random atlas 3	3	RandomAtlas	0.0333285	0.0152274
987	Continuous performance task	0.0294471	{'alpha': 0.5, 'l1_ratio': 0}	Random atlas 3	3	RandomAtlas	0.0333285	-0.0038814
988	Continuous performance task	0.0205085	{'alpha': 0.8, 'l1_ratio': 0}	Random atlas 7	7	RandomAtlas	0.0333285	-0.01282
989	Continuous performance task	0.00834286	{'alpha': 0.8, 'l1_ratio': 0}	Random atlas 7	7	RandomAtlas	0.0333285	-0.0249857
990	Continuous performance task	0.039811	{'alpha': 0.5, 'l1_ratio': 0}	Random atlas 7	7	RandomAtlas	0.0333285	0.00648243
991	Continuous performance task	0.0378411	{'alpha': 0.2, 'l1_ratio': 0.8}	Random atlas 7	7	RandomAtlas	0.0333285	0.00451257
992	Continuous performance task	0.0431804	{'alpha': 0.8, 'l1_ratio': 0}	Random atlas 7	7	RandomAtlas	0.0333285	0.00985183
993	Continuous performance task	0.0268437	{'alpha': 0.5, 'l1_ratio': 0}	RandomAtlas009_0_RandomAtlas009_0	9	RandomAtlas	0.0333285	-0.00648479
994	Continuous performance task	0.0365208	{'alpha': 0.8, 'l1_ratio': 0}	RandomAtlas009_1_RandomAtlas009_1	9	RandomAtlas	0.0333285	0.00319224
995	Continuous performance task	0.0535884	{'alpha': 0.2, 'l1_ratio': 0.2}	RandomAtlas009_2_RandomAtlas009_2	9	RandomAtlas	0.0333285	0.0202598
996	Continuous performance task	0.0693553	{'alpha': 0.2, 'l1_ratio': 0.2}	RandomAtlas009_3_RandomAtlas009_3	9	RandomAtlas	0.0333285	0.0360268
997	Continuous performance task	0.00561515	{'alpha': 1, 'l1_ratio': 0}	RandomAtlas009_4_RandomAtlas009_4	9	RandomAtlas	0.0333285	-0.0277134
998	Continuous performance task	0.0471499	{'alpha': 0.8, 'l1_ratio': 0}	RandomAtlas010_0_RandomAtlas010_0	10	RandomAtlas	0.0333285	0.0138214
999	Continuous performance task	0.065625	{'alpha': 0.8, 'l1_ratio': 0}	RandomAtlas010_1_RandomAtlas010_1	10	RandomAtlas	0.0333285	0.0322965
1000	Continuous performance task	0.0495504	{'alpha': 0.5, 'l1_ratio': 0}	RandomAtlas010_2_RandomAtlas010_2	10	RandomAtlas	0.0333285	0.0162219
1001	Continuous performance task	0.0431269	{'alpha': 0.5, 'l1_ratio': 0}	RandomAtlas010_3_RandomAtlas010_3	10	RandomAtlas	0.0333285	0.00979834
1002	Continuous performance task	0.0422542	{'alpha': 1, 'l1_ratio': 0}	RandomAtlas010_4_RandomAtlas010_4	10	RandomAtlas	0.0333285	0.00892567
1003	Continuous performance task	0.0394538	{'alpha': 1, 'l1_ratio': 0}	Random atlas 12	12	RandomAtlas	0.0333285	0.00612526
1004	Continuous performance task	0.0736478	{'alpha': 0.2, 'l1_ratio': 0.5}	Random atlas 12	12	RandomAtlas	0.0333285	0.0403193
1005	Continuous performance task	0.0377326	{'alpha': 0.5, 'l1_ratio': 0}	Random atlas 12	12	RandomAtlas	0.0333285	0.00440412
1006	Continuous performance task	-0.00632362	{'alpha': 0.2, 'l1_ratio': 1}	Random atlas 12	12	RandomAtlas	0.0333285	-0.0396521
1007	Continuous performance task	0.0783026	{'alpha': 0.2, 'l1_ratio': 0.5}	Random atlas 12	12	RandomAtlas	0.0333285	0.0449741
1008	Continuous performance task	0.00930693	{'alpha': 0.2, 'l1_ratio': 0.2}	RandomAtlas014_0_RandomAtlas014_0	14	RandomAtlas	0.0333285	-0.0240216
1009	Continuous performance task	0.0516635	{'alpha': 0.5, 'l1_ratio': 0}	RandomAtlas014_1_RandomAtlas014_1	14	RandomAtlas	0.0333285	0.018335
1010	Continuous performance task	0.0335868	{'alpha': 0.8, 'l1_ratio': 0}	RandomAtlas014_2_RandomAtlas014_2	14	RandomAtlas	0.0333285	0.000258275
1011	Continuous performance task	0.0361903	{'alpha': 0.2, 'l1_ratio': 0.5}	RandomAtlas014_3_RandomAtlas014_3	14	RandomAtlas	0.0333285	0.0028618
1012	Continuous performance task	0.0372375	{'alpha': 0.2, 'l1_ratio': 0.2}	RandomAtlas014_4_RandomAtlas014_4	14	RandomAtlas	0.0333285	0.00390898
1013	Continuous performance task	0.0669766	{'alpha': 0.8, 'l1_ratio': 0}	Random atlas 17	17	RandomAtlas	0.0333285	0.0336481
1014	Continuous performance task	0.0588404	{'alpha': 0.2, 'l1_ratio': 0.2}	Random atlas 17	17	RandomAtlas	0.0333285	0.0255119
1015	Continuous performance task	0.0544916	{'alpha': 0.2, 'l1_ratio': 0.5}	Random atlas 17	17	RandomAtlas	0.0333285	0.021163
1016	Continuous performance task	0.0840835	{'alpha': 0.2, 'l1_ratio': 0.2}	Random atlas 17	17	RandomAtlas	0.0333285	0.0507549
1017	Continuous performance task	0.0447424	{'alpha': 1, 'l1_ratio': 0}	Random atlas 17	17	RandomAtlas	0.0333285	0.0114139
1018	Continuous performance task	0.0485362	{'alpha': 0.2, 'l1_ratio': 0.5}	Random atlas 18	18	RandomAtlas	0.0333285	0.0152077
1019	Continuous performance task	0.0471896	{'alpha': 1, 'l1_ratio': 0}	Random atlas 18	18	RandomAtlas	0.0333285	0.0138611
1020	Continuous performance task	0.0447518	{'alpha': 0.8, 'l1_ratio': 0}	Random atlas 18	18	RandomAtlas	0.0333285	0.0114232
1021	Continuous performance task	0.047942	{'alpha': 0.2, 'l1_ratio': 0.5}	Random atlas 18	18	RandomAtlas	0.0333285	0.0146135
1022	Continuous performance task	0.0388054	{'alpha': 0.2, 'l1_ratio': 0.5}	Random atlas 18	18	RandomAtlas	0.0333285	0.00547686
1023	Continuous performance task	0.0372172	{'alpha': 0.2, 'l1_ratio': 1}	RandomAtlas021_0_RandomAtlas021_0	21	RandomAtlas	0.0333285	0.00388868
1024	Continuous performance task	0.0299069	{'alpha': 0.2, 'l1_ratio': 0.5}	RandomAtlas021_1_RandomAtlas021_1	21	RandomAtlas	0.0333285	-0.00342164
1025	Continuous performance task	0.0648197	{'alpha': 0.5, 'l1_ratio': 0}	RandomAtlas021_2_RandomAtlas021_2	21	RandomAtlas	0.0333285	0.0314912
1026	Continuous performance task	0.0407817	{'alpha': 0.2, 'l1_ratio': 1}	RandomAtlas021_3_RandomAtlas021_3	21	RandomAtlas	0.0333285	0.00745313
1027	Continuous performance task	0.0113319	{'alpha': 0.2, 'l1_ratio': 0.5}	RandomAtlas021_4_RandomAtlas021_4	21	RandomAtlas	0.0333285	-0.0219966
1028	Continuous performance task	0.0261321	{'alpha': 0.2, 'l1_ratio': 0.5}	RandomAtlas025_0_RandomAtlas025_0	25	RandomAtlas	0.0333285	-0.00719645
1029	Continuous performance task	0.0429237	{'alpha': 1, 'l1_ratio': 0}	RandomAtlas025_1_RandomAtlas025_1	25	RandomAtlas	0.0333285	0.00959522
1030	Continuous performance task	0.0525907	{'alpha': 1, 'l1_ratio': 0}	RandomAtlas025_2_RandomAtlas025_2	25	RandomAtlas	0.0333285	0.0192622
1031	Continuous performance task	-0.000259652	{'alpha': 0.2, 'l1_ratio': 1}	RandomAtlas025_3_RandomAtlas025_3	25	RandomAtlas	0.0333285	-0.0335882
1032	Continuous performance task	0.0114942	{'alpha': 0.5, 'l1_ratio': 0}	RandomAtlas025_4_RandomAtlas025_4	25	RandomAtlas	0.0333285	-0.0218344
1033	Continuous performance task	0.049924	{'alpha': 1, 'l1_ratio': 0}	RandomAtlas031_0_RandomAtlas031_0	31	RandomAtlas	0.0333285	0.0165954
1034	Continuous performance task	0.0242076	{'alpha': 1, 'l1_ratio': 0}	RandomAtlas031_1_RandomAtlas031_1	31	RandomAtlas	0.0333285	-0.00912097
1035	Continuous performance task	0.030033	{'alpha': 1, 'l1_ratio': 0}	RandomAtlas031_2_RandomAtlas031_2	31	RandomAtlas	0.0333285	-0.00329552
1036	Continuous performance task	0.0523723	{'alpha': 1, 'l1_ratio': 0}	RandomAtlas031_3_RandomAtlas031_3	31	RandomAtlas	0.0333285	0.0190437
1037	Continuous performance task	0.0618402	{'alpha': 1, 'l1_ratio': 0}	RandomAtlas031_4_RandomAtlas031_4	31	RandomAtlas	0.0333285	0.0285116
1038	Continuous performance task	0.0330844	{'alpha': 1, 'l1_ratio': 0}	RandomAtlas037_0_RandomAtlas037_0	37	RandomAtlas	0.0333285	-0.000244121
1039	Continuous performance task	0.0383889	{'alpha': 0.2, 'l1_ratio': 0.5}	RandomAtlas037_1_RandomAtlas037_1	37	RandomAtlas	0.0333285	0.0050604
1040	Continuous performance task	0.0638298	{'alpha': 0.2, 'l1_ratio': 0.8}	RandomAtlas037_2_RandomAtlas037_2	37	RandomAtlas	0.0333285	0.0305013
1041	Continuous performance task	0.0348089	{'alpha': 0.2, 'l1_ratio': 0.5}	RandomAtlas037_3_RandomAtlas037_3	37	RandomAtlas	0.0333285	0.00148037
1042	Continuous performance task	0.0544649	{'alpha': 0.2, 'l1_ratio': 0.8}	RandomAtlas037_4_RandomAtlas037_4	37	RandomAtlas	0.0333285	0.0211364
1043	Continuous performance task	0.0499923	{'alpha': 1, 'l1_ratio': 0}	RandomAtlas045_0_RandomAtlas045_0	45	RandomAtlas	0.0333285	0.0166638
1044	Continuous performance task	0.0601459	{'alpha': 0.2, 'l1_ratio': 0.5}	RandomAtlas045_1_RandomAtlas045_1	45	RandomAtlas	0.0333285	0.0268174
1045	Continuous performance task	-0.00912647	{'alpha': 1, 'l1_ratio': 0}	RandomAtlas045_2_RandomAtlas045_2	45	RandomAtlas	0.0333285	-0.042455
1046	Continuous performance task	0.00908056	{'alpha': 1, 'l1_ratio': 0}	RandomAtlas045_3_RandomAtlas045_3	45	RandomAtlas	0.0333285	-0.024248
1047	Continuous performance task	0.036897	{'alpha': 1, 'l1_ratio': 0}	RandomAtlas045_4_RandomAtlas045_4	45	RandomAtlas	0.0333285	0.0035685
1048	Continuous performance task	0.0048723	{'alpha': 0.5, 'l1_ratio': 0.2}	RandomAtlas054_0_RandomAtlas054_0	54	RandomAtlas	0.0333285	-0.0284562
1049	Continuous performance task	0.045717	{'alpha': 0.5, 'l1_ratio': 0.2}	RandomAtlas054_1_RandomAtlas054_1	54	RandomAtlas	0.0333285	0.0123885
1050	Continuous performance task	0.0253558	{'alpha': 1, 'l1_ratio': 0}	RandomAtlas054_2_RandomAtlas054_2	54	RandomAtlas	0.0333285	-0.00797276
1051	Continuous performance task	0.0396994	{'alpha': 0.5, 'l1_ratio': 0.2}	RandomAtlas054_3_RandomAtlas054_3	54	RandomAtlas	0.0333285	0.0063709
1052	Continuous performance task	0.0275616	{'alpha': 1, 'l1_ratio': 0}	RandomAtlas054_4_RandomAtlas054_4	54	RandomAtlas	0.0333285	-0.00576696
1053	Continuous performance task	0.0151023	{'alpha': 1, 'l1_ratio': 0}	RandomAtlas065_0_RandomAtlas065_0	65	RandomAtlas	0.0333285	-0.0182262
1054	Continuous performance task	0.0162138	{'alpha': 0.5, 'l1_ratio': 0.2}	RandomAtlas065_1_RandomAtlas065_1	65	RandomAtlas	0.0333285	-0.0171147
1055	Continuous performance task	0.0222467	{'alpha': 0.5, 'l1_ratio': 0.2}	RandomAtlas065_2_RandomAtlas065_2	65	RandomAtlas	0.0333285	-0.0110818
1056	Continuous performance task	0.0553087	{'alpha': 1, 'l1_ratio': 0}	RandomAtlas065_3_RandomAtlas065_3	65	RandomAtlas	0.0333285	0.0219801
1057	Continuous performance task	0.00637644	{'alpha': 0.2, 'l1_ratio': 0.8}	RandomAtlas065_4_RandomAtlas065_4	65	RandomAtlas	0.0333285	-0.0269521
1058	Continuous performance task	0.0244183	{'alpha': 1, 'l1_ratio': 0}	RandomAtlas079_0_RandomAtlas079_0	79	RandomAtlas	0.0333285	-0.00891023
1059	Continuous performance task	0.0336568	{'alpha': 0.8, 'l1_ratio': 0.2}	RandomAtlas079_1_RandomAtlas079_1	79	RandomAtlas	0.0333285	0.000328314
1060	Continuous performance task	0.0298664	{'alpha': 0.5, 'l1_ratio': 0.2}	RandomAtlas079_2_RandomAtlas079_2	79	RandomAtlas	0.0333285	-0.00346217
1061	Continuous performance task	-0.0192941	{'alpha': 1, 'l1_ratio': 0}	RandomAtlas079_3_RandomAtlas079_3	79	RandomAtlas	0.0333285	-0.0526226
1062	Continuous performance task	-0.000328807	{'alpha': 0.5, 'l1_ratio': 0.2}	RandomAtlas079_4_RandomAtlas079_4	79	RandomAtlas	0.0333285	-0.0336573
1063	Continuous performance task	0.04417	{'alpha': 0.5, 'l1_ratio': 0.2}	Random atlas 96	96	RandomAtlas	0.0333285	0.0108415
1064	Continuous performance task	0.0342017	{'alpha': 0.2, 'l1_ratio': 0.5}	Random atlas 96	96	RandomAtlas	0.0333285	0.000873171
1065	Continuous performance task	0.0338136	{'alpha': 0.5, 'l1_ratio': 0.2}	Random atlas 96	96	RandomAtlas	0.0333285	0.00048512
1066	Continuous performance task	0.00111315	{'alpha': 0.5, 'l1_ratio': 0.2}	Random atlas 96	96	RandomAtlas	0.0333285	-0.0322154
1067	Continuous performance task	-0.0601093	{'alpha': 1, 'l1_ratio': 0}	Random atlas 96	96	RandomAtlas	0.0333285	-0.0934379
1068	Continuous performance task	0.0154781	{'alpha': 0.5, 'l1_ratio': 0.2}	RandomAtlas100_0_RandomAtlas100_0	100	RandomAtlas	0.0333285	-0.0178505
1069	Continuous performance task	0.0262329	{'alpha': 0.5, 'l1_ratio': 0.2}	RandomAtlas100_1_RandomAtlas100_1	100	RandomAtlas	0.0333285	-0.0070956
1070	Continuous performance task	0.0562082	{'alpha': 0.2, 'l1_ratio': 0.5}	RandomAtlas100_2_RandomAtlas100_2	100	RandomAtlas	0.0333285	0.0228797
1071	Continuous performance task	0.0283628	{'alpha': 0.2, 'l1_ratio': 0.8}	RandomAtlas100_3_RandomAtlas100_3	100	RandomAtlas	0.0333285	-0.00496576
1072	Continuous performance task	0.0332184	{'alpha': 0.5, 'l1_ratio': 0.2}	RandomAtlas100_4_RandomAtlas100_4	100	RandomAtlas	0.0333285	-0.000110114
1073	Continuous performance task	0.0526899	{'alpha': 0.5, 'l1_ratio': 0.2}	Random atlas 113	113	RandomAtlas	0.0333285	0.0193614
1074	Continuous performance task	-0.0109841	{'alpha': 0.5, 'l1_ratio': 0.2}	Random atlas 113	113	RandomAtlas	0.0333285	-0.0443127
1075	Continuous performance task	0.0588024	{'alpha': 0.2, 'l1_ratio': 0.5}	Random atlas 113	113	RandomAtlas	0.0333285	0.0254739
1076	Continuous performance task	0.0498538	{'alpha': 0.5, 'l1_ratio': 0.2}	Random atlas 113	113	RandomAtlas	0.0333285	0.0165253
1077	Continuous performance task	0.0240319	{'alpha': 0.5, 'l1_ratio': 0.2}	Random atlas 113	113	RandomAtlas	0.0333285	-0.00929664
1078	Continuous performance task	-0.0109913	{'alpha': 0.8, 'l1_ratio': 0.2}	RandomAtlas116_0_RandomAtlas116_0	116	RandomAtlas	0.0333285	-0.0443198
1079	Continuous performance task	0.0132162	{'alpha': 0.5, 'l1_ratio': 0.2}	RandomAtlas116_1_RandomAtlas116_1	116	RandomAtlas	0.0333285	-0.0201123
1080	Continuous performance task	0.0359047	{'alpha': 0.2, 'l1_ratio': 0.8}	RandomAtlas116_2_RandomAtlas116_2	116	RandomAtlas	0.0333285	0.00257619
1081	Continuous performance task	0.0382552	{'alpha': 0.5, 'l1_ratio': 0.2}	RandomAtlas116_3_RandomAtlas116_3	116	RandomAtlas	0.0333285	0.00492667
1082	Continuous performance task	0.015451	{'alpha': 0.5, 'l1_ratio': 0.2}	RandomAtlas116_4_RandomAtlas116_4	116	RandomAtlas	0.0333285	-0.0178776
1083	Continuous performance task	-0.00459246	{'alpha': 1, 'l1_ratio': 0}	RandomAtlas140_0_RandomAtlas140_0	140	RandomAtlas	0.0333285	-0.037921
1084	Continuous performance task	0.0144213	{'alpha': 0.8, 'l1_ratio': 0.2}	RandomAtlas140_1_RandomAtlas140_1	140	RandomAtlas	0.0333285	-0.0189072
1085	Continuous performance task	-0.00840865	{'alpha': 1, 'l1_ratio': 0}	RandomAtlas140_2_RandomAtlas140_2	140	RandomAtlas	0.0333285	-0.0417372
1086	Continuous performance task	0.00121427	{'alpha': 0.8, 'l1_ratio': 0.2}	RandomAtlas140_3_RandomAtlas140_3	140	RandomAtlas	0.0333285	-0.0321143
1087	Continuous performance task	0.0213862	{'alpha': 0.5, 'l1_ratio': 0.2}	RandomAtlas140_4_RandomAtlas140_4	140	RandomAtlas	0.0333285	-0.0119423
1088	Continuous performance task	0.0360907	{'alpha': 0.5, 'l1_ratio': 0.2}	Random atlas 166	166	RandomAtlas	0.0333285	0.00276216
1089	Continuous performance task	0.0137082	{'alpha': 0.5, 'l1_ratio': 0.2}	Random atlas 166	166	RandomAtlas	0.0333285	-0.0196204
1090	Continuous performance task	0.0269041	{'alpha': 0.5, 'l1_ratio': 0.2}	Random atlas 166	166	RandomAtlas	0.0333285	-0.00642446
1091	Continuous performance task	0.0157245	{'alpha': 0.5, 'l1_ratio': 0.2}	Random atlas 166	166	RandomAtlas	0.0333285	-0.0176041
1092	Continuous performance task	-0.0214689	{'alpha': 1, 'l1_ratio': 0}	Random atlas 166	166	RandomAtlas	0.0333285	-0.0547974
1093	Continuous performance task	0.0488186	{'alpha': 1, 'l1_ratio': 0}	RandomAtlas169_0_RandomAtlas169_0	169	RandomAtlas	0.0333285	0.0154901
1094	Continuous performance task	0.0200281	{'alpha': 0.2, 'l1_ratio': 0.8}	RandomAtlas169_1_RandomAtlas169_1	169	RandomAtlas	0.0333285	-0.0133004
1095	Continuous performance task	0.00745437	{'alpha': 0.2, 'l1_ratio': 1}	RandomAtlas169_2_RandomAtlas169_2	169	RandomAtlas	0.0333285	-0.0258742
1096	Continuous performance task	-0.06633	{'alpha': 0.8, 'l1_ratio': 0.2}	RandomAtlas169_3_RandomAtlas169_3	169	RandomAtlas	0.0333285	-0.0996585
1097	Continuous performance task	0.0228714	{'alpha': 0.5, 'l1_ratio': 0.2}	RandomAtlas169_4_RandomAtlas169_4	169	RandomAtlas	0.0333285	-0.0104571
1098	Continuous performance task	0.0240651	{'alpha': 0.5, 'l1_ratio': 0.2}	Random atlas 200	200	RandomAtlas	0.0333285	-0.00926346
1099	Continuous performance task	-0.00744464	{'alpha': 0.8, 'l1_ratio': 0.2}	Random atlas 200	200	RandomAtlas	0.0333285	-0.0407732
1100	Continuous performance task	-0.0653643	{'alpha': 0.8, 'l1_ratio': 0.2}	Random atlas 200	200	RandomAtlas	0.0333285	-0.0986929
1101	Continuous performance task	0.0101446	{'alpha': 0.8, 'l1_ratio': 0.2}	Random atlas 200	200	RandomAtlas	0.0333285	-0.023184
1102	Continuous performance task	-0.0395705	{'alpha': 0.5, 'l1_ratio': 0.2}	Random atlas 200	200	RandomAtlas	0.0333285	-0.072899
1103	Continuous performance task	0.0153693	{'alpha': 0.2, 'l1_ratio': 0.8}	RandomAtlas204_0_RandomAtlas204_0	204	RandomAtlas	0.0333285	-0.0179592
1104	Continuous performance task	0.0161018	{'alpha': 0.2, 'l1_ratio': 0.8}	RandomAtlas204_1_RandomAtlas204_1	204	RandomAtlas	0.0333285	-0.0172268
1105	Continuous performance task	-0.00602163	{'alpha': 0.2, 'l1_ratio': 0.8}	RandomAtlas204_2_RandomAtlas204_2	204	RandomAtlas	0.0333285	-0.0393502
1106	Continuous performance task	-0.00215229	{'alpha': 0.8, 'l1_ratio': 0.2}	RandomAtlas204_3_RandomAtlas204_3	204	RandomAtlas	0.0333285	-0.0354808
1107	Continuous performance task	0.0171071	{'alpha': 0.8, 'l1_ratio': 0.2}	RandomAtlas204_4_RandomAtlas204_4	204	RandomAtlas	0.0333285	-0.0162214
1108	Continuous performance task	0.00552315	{'alpha': 0.8, 'l1_ratio': 0.2}	Random atlas 246	246	RandomAtlas	0.0333285	-0.0278054
1109	Continuous performance task	0.0245662	{'alpha': 0.8, 'l1_ratio': 0.2}	Random atlas 246	246	RandomAtlas	0.0333285	-0.00876234
1110	Continuous performance task	0.0142652	{'alpha': 0.8, 'l1_ratio': 0.2}	Random atlas 246	246	RandomAtlas	0.0333285	-0.0190633
1111	Continuous performance task	0.0324007	{'alpha': 0.5, 'l1_ratio': 0.2}	Random atlas 246	246	RandomAtlas	0.0333285	-0.000927836
1112	Continuous performance task	0.00836259	{'alpha': 0.2, 'l1_ratio': 0.8}	Random atlas 246	246	RandomAtlas	0.0333285	-0.0249659
1113	Continuous performance task	0.0256351	{'alpha': 0.2, 'l1_ratio': 0.8}	RandomAtlas298_0_RandomAtlas298_0	298	RandomAtlas	0.0333285	-0.00769347
1114	Continuous performance task	-0.00473359	{'alpha': 0.8, 'l1_ratio': 0.2}	RandomAtlas298_1_RandomAtlas298_1	298	RandomAtlas	0.0333285	-0.0380621
1115	Continuous performance task	0.011404	{'alpha': 0.5, 'l1_ratio': 0.2}	RandomAtlas298_2_RandomAtlas298_2	298	RandomAtlas	0.0333285	-0.0219245
1116	Continuous performance task	0.0071126	{'alpha': 0.8, 'l1_ratio': 0.2}	RandomAtlas298_3_RandomAtlas298_3	298	RandomAtlas	0.0333285	-0.0262159
1117	Continuous performance task	-0.02233	{'alpha': 0.2, 'l1_ratio': 1}	RandomAtlas298_4_RandomAtlas298_4	298	RandomAtlas	0.0333285	-0.0556585
1118	Continuous performance task	0.0112204	{'alpha': 0.2, 'l1_ratio': 0.8}	Random atlas 300	300	RandomAtlas	0.0333285	-0.0221081
1119	Continuous performance task	0.0106097	{'alpha': 0.8, 'l1_ratio': 0.2}	Random atlas 300	300	RandomAtlas	0.0333285	-0.0227188
1120	Continuous performance task	0.0393155	{'alpha': 0.2, 'l1_ratio': 0.8}	Random atlas 300	300	RandomAtlas	0.0333285	0.00598695
1121	Continuous performance task	0.00346802	{'alpha': 0.8, 'l1_ratio': 0.2}	Random atlas 300	300	RandomAtlas	0.0333285	-0.0298605
1122	Continuous performance task	-0.0180238	{'alpha': 0.5, 'l1_ratio': 0.5}	Random atlas 300	300	RandomAtlas	0.0333285	-0.0513523
1123	Continuous performance task	0.00112468	{'alpha': 0.8, 'l1_ratio': 0.2}	Random atlas 360	360	RandomAtlas	0.0333285	-0.0322038
1124	Continuous performance task	-0.00806643	{'alpha': 0.8, 'l1_ratio': 0.2}	Random atlas 360	360	RandomAtlas	0.0333285	-0.041395
1125	Continuous performance task	-0.0206184	{'alpha': 0.8, 'l1_ratio': 0.2}	Random atlas 360	360	RandomAtlas	0.0333285	-0.0539469
1126	Continuous performance task	-0.00268414	{'alpha': 0.8, 'l1_ratio': 0.2}	Random atlas 360	360	RandomAtlas	0.0333285	-0.0360127
1127	Continuous performance task	-0.0143046	{'alpha': 0.8, 'l1_ratio': 0.2}	Random atlas 360	360	RandomAtlas	0.0333285	-0.0476331
1128	Continuous performance task	0.00542258	{'alpha': 0.5, 'l1_ratio': 0}	pca_2	2	pca	0.0333285	-0.0279059
1129	Continuous performance task	0.0191019	{'alpha': 0.5, 'l1_ratio': 0}	pca_3	3	pca	0.0333285	-0.0142266
1130	Continuous performance task	0.056148	{'alpha': 0.8, 'l1_ratio': 0}	pca_7	7	pca	0.0333285	0.0228194
1131	Continuous performance task	0.04458	{'alpha': 1, 'l1_ratio': 0}	pca_9	9	pca	0.0333285	0.0112514
1132	Continuous performance task	0.0490243	{'alpha': 1, 'l1_ratio': 0}	pca_10	10	pca	0.0333285	0.0156957
1133	Continuous performance task	0.0335869	{'alpha': 1, 'l1_ratio': 0}	pca_12	12	pca	0.0333285	0.000258332
1134	Continuous performance task	0.0464094	{'alpha': 1, 'l1_ratio': 0}	pca_14	14	pca	0.0333285	0.0130809
1135	Continuous performance task	0.0431027	{'alpha': 1, 'l1_ratio': 0}	pca_17	17	pca	0.0333285	0.00977419
1136	Continuous performance task	0.0220176	{'alpha': 1, 'l1_ratio': 0}	pca_18	18	pca	0.0333285	-0.0113109
1137	Continuous performance task	0.0147399	{'alpha': 1, 'l1_ratio': 0}	pca_21	21	pca	0.0333285	-0.0185887
1138	Continuous performance task	-0.00852	{'alpha': 0.5, 'l1_ratio': 0.2}	pca_25	25	pca	0.0333285	-0.0418485
1139	Continuous performance task	0.031803	{'alpha': 1, 'l1_ratio': 0}	pca_31	31	pca	0.0333285	-0.00152552
1140	Continuous performance task	0.0444163	{'alpha': 1, 'l1_ratio': 0}	pca_37	37	pca	0.0333285	0.0110878
1141	Continuous performance task	0.0499355	{'alpha': 1, 'l1_ratio': 0}	pca_45	45	pca	0.0333285	0.016607
1142	Continuous performance task	0.0655324	{'alpha': 1, 'l1_ratio': 0}	pca_54	54	pca	0.0333285	0.0322039
1143	Continuous performance task	0.0251172	{'alpha': 1, 'l1_ratio': 0}	pca_65	65	pca	0.0333285	-0.0082113
1144	Continuous performance task	-0.0702322	{'alpha': 0.8, 'l1_ratio': 0.2}	pca_79	79	pca	0.0333285	-0.103561
1145	Continuous performance task	0.0184895	{'alpha': 1, 'l1_ratio': 0}	pca_96	96	pca	0.0333285	-0.014839
1146	Continuous performance task	-0.00374209	{'alpha': 1, 'l1_ratio': 0}	pca_100	100	pca	0.0333285	-0.0370706
1147	Continuous performance task	-0.0598159	{'alpha': 0.5, 'l1_ratio': 0.5}	pca_113	113	pca	0.0333285	-0.0931444
1148	Continuous performance task	-0.0496721	{'alpha': 0.5, 'l1_ratio': 0.5}	pca_116	116	pca	0.0333285	-0.0830006
1149	Continuous performance task	-0.0212045	{'alpha': 0.5, 'l1_ratio': 0.5}	pca_140	140	pca	0.0333285	-0.054533
1150	Continuous performance task	-0.0231406	{'alpha': 0.5, 'l1_ratio': 0.5}	pca_166	166	pca	0.0333285	-0.0564691
1151	Continuous performance task	-0.0231406	{'alpha': 0.5, 'l1_ratio': 0.5}	pca_169	169	pca	0.0333285	-0.0564691
1152	Continuous performance task	-0.0234472	{'alpha': 0.5, 'l1_ratio': 0.5}	pca_200	200	pca	0.0333285	-0.0567757
1153	Continuous performance task	-0.023078	{'alpha': 0.5, 'l1_ratio': 0.5}	pca_204	204	pca	0.0333285	-0.0564065
1154	Continuous performance task	-0.0266396	{'alpha': 0.5, 'l1_ratio': 0.5}	pca_246	246	pca	0.0333285	-0.0599681
1155	Continuous performance task	-0.0774269	{'alpha': 1, 'l1_ratio': 0}	pca_298	298	pca	0.0333285	-0.110755
1156	Continuous performance task	-0.0890814	{'alpha': 1, 'l1_ratio': 0}	pca_300	300	pca	0.0333285	-0.12241
1157	Continuous performance task	-0.0337922	{'alpha': 1, 'l1_ratio': 0}	pca_360	360	pca	0.0333285	-0.0671208
1158	Shifting attention task	0.0493633	{'alpha': 0.2, 'l1_ratio': 0.5}	Yeo 7 networks	7	atlas	0.00627105	0.0430923
1159	Shifting attention task	0.0495371	{'alpha': 0.5, 'l1_ratio': 0}	Yeo 17 networks	17	atlas	0.00627105	0.0432661
1160	Shifting attention task	0.0511409	{'alpha': 0.2, 'l1_ratio': 0.2}	MNI maxprob per hemisphere	18	atlas	0.00627105	0.0448699
1161	Shifting attention task	-0.0115888	{'alpha': 0.2, 'l1_ratio': 0}	Hemisphere	2	atlas	0.00627105	-0.0178599
1162	Shifting attention task	0.032009	{'alpha': 0.2, 'l1_ratio': 0.2}	MNI maxprob	9	atlas	0.00627105	0.025738
1163	Shifting attention task	0.0238596	{'alpha': 0.2, 'l1_ratio': 0.5}	AAL3v1	166	atlas	0.00627105	0.0175885
1164	Shifting attention task	-0.0464079	{'alpha': 0.5, 'l1_ratio': 0.2}	HarvardOxford	113	atlas	0.00627105	-0.052679
1165	Shifting attention task	0.0249729	{'alpha': 0.2, 'l1_ratio': 0.5}	Brainnetome	246	atlas	0.00627105	0.0187019
1166	Shifting attention task	-0.0953997	{'alpha': 0.5, 'l1_ratio': 0.8}	OASIS DKT	96	atlas	0.00627105	-0.101671
1167	Shifting attention task	-0.0463593	{'alpha': 0.5, 'l1_ratio': 0.8}	MMP	360	atlas	0.00627105	-0.0526303
1168	Shifting attention task	-0.0550653	{'alpha': 1, 'l1_ratio': 0}	Schaefer 100	100	atlas	0.00627105	-0.0613364
1169	Shifting attention task	-0.000881477	{'alpha': 0.2, 'l1_ratio': 0.5}	Schaefer 200	200	atlas	0.00627105	-0.00715253
1170	Shifting attention task	0.0194331	{'alpha': 0.2, 'l1_ratio': 0.5}	Schaefer 300	300	atlas	0.00627105	0.013162
1171	Shifting attention task	0.0033951	{'alpha': 0, 'l1_ratio': 0}	RandomAtlas002_0_RandomAtlas002_0	2	RandomAtlas	0.00627105	-0.00287595
1172	Shifting attention task	0.0391992	{'alpha': 0, 'l1_ratio': 0}	RandomAtlas002_1_RandomAtlas002_1	2	RandomAtlas	0.00627105	0.0329282
1173	Shifting attention task	0.0059977	{'alpha': 0.5, 'l1_ratio': 0}	RandomAtlas002_2_RandomAtlas002_2	2	RandomAtlas	0.00627105	-0.000273355
1174	Shifting attention task	0.033582	{'alpha': 0.2, 'l1_ratio': 0.2}	RandomAtlas002_3_RandomAtlas002_3	2	RandomAtlas	0.00627105	0.0273109
1175	Shifting attention task	-0.00785935	{'alpha': 0.2, 'l1_ratio': 0}	RandomAtlas002_4_RandomAtlas002_4	2	RandomAtlas	0.00627105	-0.0141304
1176	Shifting attention task	-0.00103948	{'alpha': 0.5, 'l1_ratio': 0}	Random atlas 3	3	RandomAtlas	0.00627105	-0.00731053
1177	Shifting attention task	0.0378854	{'alpha': 0.2, 'l1_ratio': 0}	Random atlas 3	3	RandomAtlas	0.00627105	0.0316143
1178	Shifting attention task	0.00459042	{'alpha': 0.2, 'l1_ratio': 0}	Random atlas 3	3	RandomAtlas	0.00627105	-0.00168063
1179	Shifting attention task	0.025708	{'alpha': 0.2, 'l1_ratio': 0}	Random atlas 3	3	RandomAtlas	0.00627105	0.019437
1180	Shifting attention task	0.0385405	{'alpha': 0.2, 'l1_ratio': 0}	Random atlas 3	3	RandomAtlas	0.00627105	0.0322695
1181	Shifting attention task	0.00692184	{'alpha': 0.2, 'l1_ratio': 0}	Random atlas 7	7	RandomAtlas	0.00627105	0.000650792
1182	Shifting attention task	0.0410974	{'alpha': 0.2, 'l1_ratio': 0.2}	Random atlas 7	7	RandomAtlas	0.00627105	0.0348263
1183	Shifting attention task	0.017644	{'alpha': 0.2, 'l1_ratio': 0}	Random atlas 7	7	RandomAtlas	0.00627105	0.011373
1184	Shifting attention task	0.0595809	{'alpha': 0.2, 'l1_ratio': 0}	Random atlas 7	7	RandomAtlas	0.00627105	0.0533099
1185	Shifting attention task	0.0600451	{'alpha': 0.2, 'l1_ratio': 0}	Random atlas 7	7	RandomAtlas	0.00627105	0.0537741
1186	Shifting attention task	0.0183656	{'alpha': 0.8, 'l1_ratio': 0}	RandomAtlas009_0_RandomAtlas009_0	9	RandomAtlas	0.00627105	0.0120946
1187	Shifting attention task	0.0606181	{'alpha': 0.5, 'l1_ratio': 0}	RandomAtlas009_1_RandomAtlas009_1	9	RandomAtlas	0.00627105	0.054347
1188	Shifting attention task	0.0073735	{'alpha': 0.8, 'l1_ratio': 0}	RandomAtlas009_2_RandomAtlas009_2	9	RandomAtlas	0.00627105	0.00110245
1189	Shifting attention task	0.0427567	{'alpha': 0.2, 'l1_ratio': 0}	RandomAtlas009_3_RandomAtlas009_3	9	RandomAtlas	0.00627105	0.0364856
1190	Shifting attention task	0.0422889	{'alpha': 0.2, 'l1_ratio': 0}	RandomAtlas009_4_RandomAtlas009_4	9	RandomAtlas	0.00627105	0.0360179
1191	Shifting attention task	0.0454579	{'alpha': 0.5, 'l1_ratio': 0}	RandomAtlas010_0_RandomAtlas010_0	10	RandomAtlas	0.00627105	0.0391868
1192	Shifting attention task	-0.00856134	{'alpha': 1, 'l1_ratio': 0}	RandomAtlas010_1_RandomAtlas010_1	10	RandomAtlas	0.00627105	-0.0148324
1193	Shifting attention task	0.0683395	{'alpha': 0.2, 'l1_ratio': 0.2}	RandomAtlas010_2_RandomAtlas010_2	10	RandomAtlas	0.00627105	0.0620685
1194	Shifting attention task	0.0245729	{'alpha': 0.5, 'l1_ratio': 0}	RandomAtlas010_3_RandomAtlas010_3	10	RandomAtlas	0.00627105	0.0183018
1195	Shifting attention task	0.0562707	{'alpha': 0.5, 'l1_ratio': 0}	RandomAtlas010_4_RandomAtlas010_4	10	RandomAtlas	0.00627105	0.0499997
1196	Shifting attention task	0.0306929	{'alpha': 1, 'l1_ratio': 0}	Random atlas 12	12	RandomAtlas	0.00627105	0.0244219
1197	Shifting attention task	0.0499338	{'alpha': 0.2, 'l1_ratio': 0.2}	Random atlas 12	12	RandomAtlas	0.00627105	0.0436628
1198	Shifting attention task	0.0476245	{'alpha': 0.2, 'l1_ratio': 0.2}	Random atlas 12	12	RandomAtlas	0.00627105	0.0413534
1199	Shifting attention task	0.0382909	{'alpha': 0.2, 'l1_ratio': 0.2}	Random atlas 12	12	RandomAtlas	0.00627105	0.0320199
1200	Shifting attention task	0.0281608	{'alpha': 0.2, 'l1_ratio': 0.2}	Random atlas 12	12	RandomAtlas	0.00627105	0.0218898
1201	Shifting attention task	0.0319791	{'alpha': 0.8, 'l1_ratio': 0}	RandomAtlas014_0_RandomAtlas014_0	14	RandomAtlas	0.00627105	0.0257081
1202	Shifting attention task	0.0675834	{'alpha': 0.2, 'l1_ratio': 0}	RandomAtlas014_1_RandomAtlas014_1	14	RandomAtlas	0.00627105	0.0613124
1203	Shifting attention task	0.0341586	{'alpha': 0.8, 'l1_ratio': 0}	RandomAtlas014_2_RandomAtlas014_2	14	RandomAtlas	0.00627105	0.0278875
1204	Shifting attention task	0.0892474	{'alpha': 0.2, 'l1_ratio': 0.2}	RandomAtlas014_3_RandomAtlas014_3	14	RandomAtlas	0.00627105	0.0829764
1205	Shifting attention task	0.0598363	{'alpha': 0.5, 'l1_ratio': 0}	RandomAtlas014_4_RandomAtlas014_4	14	RandomAtlas	0.00627105	0.0535652
1206	Shifting attention task	0.0560457	{'alpha': 0.5, 'l1_ratio': 0}	Random atlas 17	17	RandomAtlas	0.00627105	0.0497747
1207	Shifting attention task	0.0411842	{'alpha': 0.2, 'l1_ratio': 0.2}	Random atlas 17	17	RandomAtlas	0.00627105	0.0349132
1208	Shifting attention task	0.0359975	{'alpha': 1, 'l1_ratio': 0}	Random atlas 17	17	RandomAtlas	0.00627105	0.0297265
1209	Shifting attention task	0.065529	{'alpha': 0.5, 'l1_ratio': 0}	Random atlas 17	17	RandomAtlas	0.00627105	0.0592579
1210	Shifting attention task	0.102159	{'alpha': 0.2, 'l1_ratio': 0}	Random atlas 17	17	RandomAtlas	0.00627105	0.095888
1211	Shifting attention task	0.0285242	{'alpha': 1, 'l1_ratio': 0}	Random atlas 18	18	RandomAtlas	0.00627105	0.0222531
1212	Shifting attention task	0.0643491	{'alpha': 0.8, 'l1_ratio': 0}	Random atlas 18	18	RandomAtlas	0.00627105	0.058078
1213	Shifting attention task	0.0365255	{'alpha': 0.8, 'l1_ratio': 0}	Random atlas 18	18	RandomAtlas	0.00627105	0.0302545
1214	Shifting attention task	0.0534355	{'alpha': 0.5, 'l1_ratio': 0}	Random atlas 18	18	RandomAtlas	0.00627105	0.0471645
1215	Shifting attention task	0.0446321	{'alpha': 1, 'l1_ratio': 0}	Random atlas 18	18	RandomAtlas	0.00627105	0.0383611
1216	Shifting attention task	0.00848389	{'alpha': 1, 'l1_ratio': 0}	RandomAtlas021_0_RandomAtlas021_0	21	RandomAtlas	0.00627105	0.00221284
1217	Shifting attention task	0.0751922	{'alpha': 0.2, 'l1_ratio': 0.2}	RandomAtlas021_1_RandomAtlas021_1	21	RandomAtlas	0.00627105	0.0689212
1218	Shifting attention task	0.0424088	{'alpha': 0.2, 'l1_ratio': 0.2}	RandomAtlas021_2_RandomAtlas021_2	21	RandomAtlas	0.00627105	0.0361378
1219	Shifting attention task	0.0262661	{'alpha': 1, 'l1_ratio': 0}	RandomAtlas021_3_RandomAtlas021_3	21	RandomAtlas	0.00627105	0.019995
1220	Shifting attention task	0.0506019	{'alpha': 0.2, 'l1_ratio': 0.2}	RandomAtlas021_4_RandomAtlas021_4	21	RandomAtlas	0.00627105	0.0443308
1221	Shifting attention task	0.0769816	{'alpha': 0.2, 'l1_ratio': 0.2}	RandomAtlas025_0_RandomAtlas025_0	25	RandomAtlas	0.00627105	0.0707106
1222	Shifting attention task	0.0230653	{'alpha': 0.8, 'l1_ratio': 0}	RandomAtlas025_1_RandomAtlas025_1	25	RandomAtlas	0.00627105	0.0167942
1223	Shifting attention task	0.0807767	{'alpha': 0.5, 'l1_ratio': 0}	RandomAtlas025_2_RandomAtlas025_2	25	RandomAtlas	0.00627105	0.0745056
1224	Shifting attention task	0.0790876	{'alpha': 0.8, 'l1_ratio': 0}	RandomAtlas025_3_RandomAtlas025_3	25	RandomAtlas	0.00627105	0.0728166
1225	Shifting attention task	0.0795533	{'alpha': 0.2, 'l1_ratio': 0.2}	RandomAtlas025_4_RandomAtlas025_4	25	RandomAtlas	0.00627105	0.0732822
1226	Shifting attention task	0.0403734	{'alpha': 1, 'l1_ratio': 0}	RandomAtlas031_0_RandomAtlas031_0	31	RandomAtlas	0.00627105	0.0341023
1227	Shifting attention task	0.0285102	{'alpha': 1, 'l1_ratio': 0}	RandomAtlas031_1_RandomAtlas031_1	31	RandomAtlas	0.00627105	0.0222392
1228	Shifting attention task	0.0400323	{'alpha': 0.2, 'l1_ratio': 0.2}	RandomAtlas031_2_RandomAtlas031_2	31	RandomAtlas	0.00627105	0.0337613
1229	Shifting attention task	0.0534033	{'alpha': 1, 'l1_ratio': 0}	RandomAtlas031_3_RandomAtlas031_3	31	RandomAtlas	0.00627105	0.0471323
1230	Shifting attention task	0.0530111	{'alpha': 1, 'l1_ratio': 0}	RandomAtlas031_4_RandomAtlas031_4	31	RandomAtlas	0.00627105	0.0467401
1231	Shifting attention task	-0.105034	{'alpha': 1, 'l1_ratio': 0}	RandomAtlas037_0_RandomAtlas037_0	37	RandomAtlas	0.00627105	-0.111305
1232	Shifting attention task	0.0551317	{'alpha': 1, 'l1_ratio': 0}	RandomAtlas037_1_RandomAtlas037_1	37	RandomAtlas	0.00627105	0.0488607
1233	Shifting attention task	0.0355214	{'alpha': 1, 'l1_ratio': 0}	RandomAtlas037_2_RandomAtlas037_2	37	RandomAtlas	0.00627105	0.0292503
1234	Shifting attention task	0.04358	{'alpha': 0.8, 'l1_ratio': 0}	RandomAtlas037_3_RandomAtlas037_3	37	RandomAtlas	0.00627105	0.0373089
1235	Shifting attention task	0.00883495	{'alpha': 0.2, 'l1_ratio': 0.2}	RandomAtlas037_4_RandomAtlas037_4	37	RandomAtlas	0.00627105	0.0025639
1236	Shifting attention task	0.0484642	{'alpha': 0.2, 'l1_ratio': 0.2}	RandomAtlas045_0_RandomAtlas045_0	45	RandomAtlas	0.00627105	0.0421932
1237	Shifting attention task	-0.00131263	{'alpha': 0.2, 'l1_ratio': 0.2}	RandomAtlas045_1_RandomAtlas045_1	45	RandomAtlas	0.00627105	-0.00758368
1238	Shifting attention task	0.0657324	{'alpha': 1, 'l1_ratio': 0}	RandomAtlas045_2_RandomAtlas045_2	45	RandomAtlas	0.00627105	0.0594614
1239	Shifting attention task	0.0202121	{'alpha': 1, 'l1_ratio': 0}	RandomAtlas045_3_RandomAtlas045_3	45	RandomAtlas	0.00627105	0.013941
1240	Shifting attention task	0.0300922	{'alpha': 0.2, 'l1_ratio': 0.2}	RandomAtlas045_4_RandomAtlas045_4	45	RandomAtlas	0.00627105	0.0238211
1241	Shifting attention task	0.044024	{'alpha': 1, 'l1_ratio': 0}	RandomAtlas054_0_RandomAtlas054_0	54	RandomAtlas	0.00627105	0.037753
1242	Shifting attention task	0.0368386	{'alpha': 1, 'l1_ratio': 0}	RandomAtlas054_1_RandomAtlas054_1	54	RandomAtlas	0.00627105	0.0305676
1243	Shifting attention task	0.0785043	{'alpha': 0.8, 'l1_ratio': 0}	RandomAtlas054_2_RandomAtlas054_2	54	RandomAtlas	0.00627105	0.0722332
1244	Shifting attention task	0.0870822	{'alpha': 1, 'l1_ratio': 0}	RandomAtlas054_3_RandomAtlas054_3	54	RandomAtlas	0.00627105	0.0808112
1245	Shifting attention task	0.0993223	{'alpha': 1, 'l1_ratio': 0}	RandomAtlas054_4_RandomAtlas054_4	54	RandomAtlas	0.00627105	0.0930513
1246	Shifting attention task	-0.0817224	{'alpha': 1, 'l1_ratio': 0}	RandomAtlas065_0_RandomAtlas065_0	65	RandomAtlas	0.00627105	-0.0879934
1247	Shifting attention task	0.0195872	{'alpha': 0.2, 'l1_ratio': 0.2}	RandomAtlas065_1_RandomAtlas065_1	65	RandomAtlas	0.00627105	0.0133162
1248	Shifting attention task	0.0747311	{'alpha': 0.2, 'l1_ratio': 0.2}	RandomAtlas065_2_RandomAtlas065_2	65	RandomAtlas	0.00627105	0.0684601
1249	Shifting attention task	0.0463257	{'alpha': 1, 'l1_ratio': 0}	RandomAtlas065_3_RandomAtlas065_3	65	RandomAtlas	0.00627105	0.0400546
1250	Shifting attention task	-0.0740127	{'alpha': 0.5, 'l1_ratio': 0.8}	RandomAtlas065_4_RandomAtlas065_4	65	RandomAtlas	0.00627105	-0.0802838
1251	Shifting attention task	0.0661455	{'alpha': 1, 'l1_ratio': 0}	RandomAtlas079_0_RandomAtlas079_0	79	RandomAtlas	0.00627105	0.0598745
1252	Shifting attention task	0.037012	{'alpha': 1, 'l1_ratio': 0}	RandomAtlas079_1_RandomAtlas079_1	79	RandomAtlas	0.00627105	0.030741
1253	Shifting attention task	0.0350968	{'alpha': 1, 'l1_ratio': 0}	RandomAtlas079_2_RandomAtlas079_2	79	RandomAtlas	0.00627105	0.0288258
1254	Shifting attention task	0.040961	{'alpha': 1, 'l1_ratio': 0}	RandomAtlas079_3_RandomAtlas079_3	79	RandomAtlas	0.00627105	0.03469
1255	Shifting attention task	-0.00413261	{'alpha': 1, 'l1_ratio': 0}	RandomAtlas079_4_RandomAtlas079_4	79	RandomAtlas	0.00627105	-0.0104037
1256	Shifting attention task	0.022915	{'alpha': 1, 'l1_ratio': 0}	Random atlas 96	96	RandomAtlas	0.00627105	0.0166439
1257	Shifting attention task	0.0982538	{'alpha': 1, 'l1_ratio': 0}	Random atlas 96	96	RandomAtlas	0.00627105	0.0919827
1258	Shifting attention task	0.0916566	{'alpha': 0.2, 'l1_ratio': 0.2}	Random atlas 96	96	RandomAtlas	0.00627105	0.0853855
1259	Shifting attention task	0.068827	{'alpha': 1, 'l1_ratio': 0}	Random atlas 96	96	RandomAtlas	0.00627105	0.0625559
1260	Shifting attention task	0.0797036	{'alpha': 0.2, 'l1_ratio': 0.2}	Random atlas 96	96	RandomAtlas	0.00627105	0.0734326
1261	Shifting attention task	0.0740093	{'alpha': 1, 'l1_ratio': 0}	RandomAtlas100_0_RandomAtlas100_0	100	RandomAtlas	0.00627105	0.0677382
1262	Shifting attention task	-0.0180086	{'alpha': 1, 'l1_ratio': 0}	RandomAtlas100_1_RandomAtlas100_1	100	RandomAtlas	0.00627105	-0.0242797
1263	Shifting attention task	-0.125969	{'alpha': 0.5, 'l1_ratio': 0.8}	RandomAtlas100_2_RandomAtlas100_2	100	RandomAtlas	0.00627105	-0.13224
1264	Shifting attention task	-0.078181	{'alpha': 0.5, 'l1_ratio': 0.8}	RandomAtlas100_3_RandomAtlas100_3	100	RandomAtlas	0.00627105	-0.0844521
1265	Shifting attention task	-0.08758	{'alpha': 0.5, 'l1_ratio': 0.8}	RandomAtlas100_4_RandomAtlas100_4	100	RandomAtlas	0.00627105	-0.0938511
1266	Shifting attention task	-0.0526937	{'alpha': 0.2, 'l1_ratio': 0.5}	Random atlas 113	113	RandomAtlas	0.00627105	-0.0589648
1267	Shifting attention task	0.0482188	{'alpha': 1, 'l1_ratio': 0}	Random atlas 113	113	RandomAtlas	0.00627105	0.0419477
1268	Shifting attention task	-0.100101	{'alpha': 0.5, 'l1_ratio': 0.8}	Random atlas 113	113	RandomAtlas	0.00627105	-0.106372
1269	Shifting attention task	-0.0895074	{'alpha': 0.5, 'l1_ratio': 0.8}	Random atlas 113	113	RandomAtlas	0.00627105	-0.0957785
1270	Shifting attention task	0.0457075	{'alpha': 1, 'l1_ratio': 0}	Random atlas 113	113	RandomAtlas	0.00627105	0.0394365
1271	Shifting attention task	-0.0574485	{'alpha': 1, 'l1_ratio': 0}	RandomAtlas116_0_RandomAtlas116_0	116	RandomAtlas	0.00627105	-0.0637196
1272	Shifting attention task	-0.114389	{'alpha': 0.5, 'l1_ratio': 0.8}	RandomAtlas116_1_RandomAtlas116_1	116	RandomAtlas	0.00627105	-0.12066
1273	Shifting attention task	0.0701078	{'alpha': 0.2, 'l1_ratio': 0.2}	RandomAtlas116_2_RandomAtlas116_2	116	RandomAtlas	0.00627105	0.0638368
1274	Shifting attention task	0.0647535	{'alpha': 1, 'l1_ratio': 0}	RandomAtlas116_3_RandomAtlas116_3	116	RandomAtlas	0.00627105	0.0584825
1275	Shifting attention task	0.112636	{'alpha': 0.2, 'l1_ratio': 0.2}	RandomAtlas116_4_RandomAtlas116_4	116	RandomAtlas	0.00627105	0.106365
1276	Shifting attention task	-0.0856856	{'alpha': 1, 'l1_ratio': 0}	RandomAtlas140_0_RandomAtlas140_0	140	RandomAtlas	0.00627105	-0.0919566
1277	Shifting attention task	0.0362639	{'alpha': 0.2, 'l1_ratio': 0.2}	RandomAtlas140_1_RandomAtlas140_1	140	RandomAtlas	0.00627105	0.0299928
1278	Shifting attention task	-0.0824872	{'alpha': 0.2, 'l1_ratio': 0.5}	RandomAtlas140_2_RandomAtlas140_2	140	RandomAtlas	0.00627105	-0.0887582
1279	Shifting attention task	-0.0997738	{'alpha': 0.5, 'l1_ratio': 0.8}	RandomAtlas140_3_RandomAtlas140_3	140	RandomAtlas	0.00627105	-0.106045
1280	Shifting attention task	0.0775056	{'alpha': 1, 'l1_ratio': 0}	RandomAtlas140_4_RandomAtlas140_4	140	RandomAtlas	0.00627105	0.0712346
1281	Shifting attention task	-0.0105873	{'alpha': 0.2, 'l1_ratio': 0.5}	Random atlas 166	166	RandomAtlas	0.00627105	-0.0168583
1282	Shifting attention task	-0.0998737	{'alpha': 0.5, 'l1_ratio': 0.8}	Random atlas 166	166	RandomAtlas	0.00627105	-0.106145
1283	Shifting attention task	-0.00110553	{'alpha': 0.5, 'l1_ratio': 0.2}	Random atlas 166	166	RandomAtlas	0.00627105	-0.00737658
1284	Shifting attention task	-0.0796027	{'alpha': 0.5, 'l1_ratio': 0.8}	Random atlas 166	166	RandomAtlas	0.00627105	-0.0858738
1285	Shifting attention task	-0.11487	{'alpha': 0.5, 'l1_ratio': 0.8}	Random atlas 166	166	RandomAtlas	0.00627105	-0.121141
1286	Shifting attention task	-0.00840268	{'alpha': 0.2, 'l1_ratio': 0.5}	RandomAtlas169_0_RandomAtlas169_0	169	RandomAtlas	0.00627105	-0.0146737
1287	Shifting attention task	0.0428184	{'alpha': 0.2, 'l1_ratio': 0.5}	RandomAtlas169_1_RandomAtlas169_1	169	RandomAtlas	0.00627105	0.0365474
1288	Shifting attention task	-0.0492168	{'alpha': 0.5, 'l1_ratio': 0.2}	RandomAtlas169_2_RandomAtlas169_2	169	RandomAtlas	0.00627105	-0.0554878
1289	Shifting attention task	-0.100009	{'alpha': 0.5, 'l1_ratio': 1}	RandomAtlas169_3_RandomAtlas169_3	169	RandomAtlas	0.00627105	-0.10628
1290	Shifting attention task	-0.0268139	{'alpha': 0.2, 'l1_ratio': 0.5}	RandomAtlas169_4_RandomAtlas169_4	169	RandomAtlas	0.00627105	-0.0330849
1291	Shifting attention task	-0.136133	{'alpha': 0.5, 'l1_ratio': 0.2}	Random atlas 200	200	RandomAtlas	0.00627105	-0.142404
1292	Shifting attention task	-0.088955	{'alpha': 0.5, 'l1_ratio': 0.8}	Random atlas 200	200	RandomAtlas	0.00627105	-0.0952261
1293	Shifting attention task	0.0789836	{'alpha': 1, 'l1_ratio': 0}	Random atlas 200	200	RandomAtlas	0.00627105	0.0727125
1294	Shifting attention task	-0.0837862	{'alpha': 0.5, 'l1_ratio': 0.8}	Random atlas 200	200	RandomAtlas	0.00627105	-0.0900573
1295	Shifting attention task	-0.112324	{'alpha': 0.5, 'l1_ratio': 0.8}	Random atlas 200	200	RandomAtlas	0.00627105	-0.118595
1296	Shifting attention task	-0.00536886	{'alpha': 0.2, 'l1_ratio': 0.5}	RandomAtlas204_0_RandomAtlas204_0	204	RandomAtlas	0.00627105	-0.0116399
1297	Shifting attention task	-0.0667607	{'alpha': 0.5, 'l1_ratio': 0.8}	RandomAtlas204_1_RandomAtlas204_1	204	RandomAtlas	0.00627105	-0.0730317
1298	Shifting attention task	0.0408188	{'alpha': 0.2, 'l1_ratio': 0.5}	RandomAtlas204_2_RandomAtlas204_2	204	RandomAtlas	0.00627105	0.0345477
1299	Shifting attention task	0.0636327	{'alpha': 0.2, 'l1_ratio': 0.2}	RandomAtlas204_3_RandomAtlas204_3	204	RandomAtlas	0.00627105	0.0573616
1300	Shifting attention task	-0.0937022	{'alpha': 0.5, 'l1_ratio': 0.8}	RandomAtlas204_4_RandomAtlas204_4	204	RandomAtlas	0.00627105	-0.0999733
1301	Shifting attention task	-0.0166749	{'alpha': 0.5, 'l1_ratio': 0.2}	Random atlas 246	246	RandomAtlas	0.00627105	-0.022946
1302	Shifting attention task	-0.16357	{'alpha': 0.2, 'l1_ratio': 0.2}	Random atlas 246	246	RandomAtlas	0.00627105	-0.169841
1303	Shifting attention task	-0.118324	{'alpha': 0.5, 'l1_ratio': 0.2}	Random atlas 246	246	RandomAtlas	0.00627105	-0.124595
1304	Shifting attention task	-0.0892561	{'alpha': 0.5, 'l1_ratio': 0.8}	Random atlas 246	246	RandomAtlas	0.00627105	-0.0955272
1305	Shifting attention task	-0.0195275	{'alpha': 0.2, 'l1_ratio': 0.5}	Random atlas 246	246	RandomAtlas	0.00627105	-0.0257986
1306	Shifting attention task	-0.203458	{'alpha': 0.2, 'l1_ratio': 0.2}	RandomAtlas298_0_RandomAtlas298_0	298	RandomAtlas	0.00627105	-0.209729
1307	Shifting attention task	-0.082636	{'alpha': 0.5, 'l1_ratio': 0.8}	RandomAtlas298_1_RandomAtlas298_1	298	RandomAtlas	0.00627105	-0.0889071
1308	Shifting attention task	-0.0828084	{'alpha': 0.5, 'l1_ratio': 0.8}	RandomAtlas298_2_RandomAtlas298_2	298	RandomAtlas	0.00627105	-0.0890794
1309	Shifting attention task	-0.0994246	{'alpha': 0.5, 'l1_ratio': 0.8}	RandomAtlas298_3_RandomAtlas298_3	298	RandomAtlas	0.00627105	-0.105696
1310	Shifting attention task	-0.122969	{'alpha': 0.2, 'l1_ratio': 0.5}	RandomAtlas298_4_RandomAtlas298_4	298	RandomAtlas	0.00627105	-0.12924
1311	Shifting attention task	-0.0961553	{'alpha': 0.5, 'l1_ratio': 0.8}	Random atlas 300	300	RandomAtlas	0.00627105	-0.102426
1312	Shifting attention task	-0.0709264	{'alpha': 0.5, 'l1_ratio': 0.8}	Random atlas 300	300	RandomAtlas	0.00627105	-0.0771975
1313	Shifting attention task	-0.0618446	{'alpha': 0.2, 'l1_ratio': 0.5}	Random atlas 300	300	RandomAtlas	0.00627105	-0.0681157
1314	Shifting attention task	-0.0857001	{'alpha': 0.5, 'l1_ratio': 0.8}	Random atlas 300	300	RandomAtlas	0.00627105	-0.0919712
1315	Shifting attention task	0.00257272	{'alpha': 0.5, 'l1_ratio': 0.2}	Random atlas 300	300	RandomAtlas	0.00627105	-0.00369833
1316	Shifting attention task	-0.130052	{'alpha': 0.5, 'l1_ratio': 0.2}	Random atlas 360	360	RandomAtlas	0.00627105	-0.136323
1317	Shifting attention task	-0.0521613	{'alpha': 0.5, 'l1_ratio': 0.8}	Random atlas 360	360	RandomAtlas	0.00627105	-0.0584323
1318	Shifting attention task	-0.107467	{'alpha': 0.5, 'l1_ratio': 0.8}	Random atlas 360	360	RandomAtlas	0.00627105	-0.113738
1319	Shifting attention task	-0.0878879	{'alpha': 0.5, 'l1_ratio': 0.2}	Random atlas 360	360	RandomAtlas	0.00627105	-0.0941589
1320	Shifting attention task	-0.0503032	{'alpha': 0.5, 'l1_ratio': 0.8}	Random atlas 360	360	RandomAtlas	0.00627105	-0.0565743
1321	Shifting attention task	-0.000307906	{'alpha': 0.5, 'l1_ratio': 0}	pca_2	2	pca	0.00627105	-0.00657896
1322	Shifting attention task	0.00186863	{'alpha': 0.8, 'l1_ratio': 0}	pca_3	3	pca	0.00627105	-0.00440242
1323	Shifting attention task	0.00372069	{'alpha': 0.8, 'l1_ratio': 0}	pca_7	7	pca	0.00627105	-0.00255036
1324	Shifting attention task	0.0183343	{'alpha': 1, 'l1_ratio': 0}	pca_9	9	pca	0.00627105	0.0120632
1325	Shifting attention task	0.0166019	{'alpha': 1, 'l1_ratio': 0}	pca_10	10	pca	0.00627105	0.0103308
1326	Shifting attention task	0.0293092	{'alpha': 1, 'l1_ratio': 0}	pca_12	12	pca	0.00627105	0.0230382
1327	Shifting attention task	0.0310072	{'alpha': 1, 'l1_ratio': 0}	pca_14	14	pca	0.00627105	0.0247362
1328	Shifting attention task	0.0235527	{'alpha': 1, 'l1_ratio': 0}	pca_17	17	pca	0.00627105	0.0172817
1329	Shifting attention task	-0.00883346	{'alpha': 1, 'l1_ratio': 0}	pca_18	18	pca	0.00627105	-0.0151045
1330	Shifting attention task	0.0381183	{'alpha': 1, 'l1_ratio': 0}	pca_21	21	pca	0.00627105	0.0318472
1331	Shifting attention task	0.0603192	{'alpha': 1, 'l1_ratio': 0}	pca_25	25	pca	0.00627105	0.0540481
1332	Shifting attention task	0.0919418	{'alpha': 1, 'l1_ratio': 0}	pca_31	31	pca	0.00627105	0.0856707
1333	Shifting attention task	0.090348	{'alpha': 1, 'l1_ratio': 0}	pca_37	37	pca	0.00627105	0.0840769
1334	Shifting attention task	0.00211689	{'alpha': 0.2, 'l1_ratio': 0.5}	pca_45	45	pca	0.00627105	-0.00415416
1335	Shifting attention task	-0.00691494	{'alpha': 0.2, 'l1_ratio': 0.5}	pca_54	54	pca	0.00627105	-0.013186
1336	Shifting attention task	0.0136523	{'alpha': 0.2, 'l1_ratio': 0.5}	pca_65	65	pca	0.00627105	0.00738126
1337	Shifting attention task	0.0101435	{'alpha': 0.2, 'l1_ratio': 0.5}	pca_79	79	pca	0.00627105	0.00387249
1338	Shifting attention task	-0.060837	{'alpha': 0.5, 'l1_ratio': 0.2}	pca_96	96	pca	0.00627105	-0.067108
1339	Shifting attention task	-0.0907734	{'alpha': 0.5, 'l1_ratio': 0.2}	pca_100	100	pca	0.00627105	-0.0970444
1340	Shifting attention task	-0.0710754	{'alpha': 0.5, 'l1_ratio': 0.8}	pca_113	113	pca	0.00627105	-0.0773465
1341	Shifting attention task	-0.0714617	{'alpha': 0.5, 'l1_ratio': 0.8}	pca_116	116	pca	0.00627105	-0.0777328
1342	Shifting attention task	-0.0604248	{'alpha': 0.5, 'l1_ratio': 0.8}	pca_140	140	pca	0.00627105	-0.0666958
1343	Shifting attention task	-0.023375	{'alpha': 0.5, 'l1_ratio': 0.8}	pca_166	166	pca	0.00627105	-0.0296461
1344	Shifting attention task	-0.023375	{'alpha': 0.5, 'l1_ratio': 0.8}	pca_169	169	pca	0.00627105	-0.0296461
1345	Shifting attention task	-0.0151126	{'alpha': 0.5, 'l1_ratio': 0.8}	pca_200	200	pca	0.00627105	-0.0213837
1346	Shifting attention task	-0.0151126	{'alpha': 0.5, 'l1_ratio': 0.8}	pca_204	204	pca	0.00627105	-0.0213837
1347	Shifting attention task	-0.0151126	{'alpha': 0.5, 'l1_ratio': 0.8}	pca_246	246	pca	0.00627105	-0.0213837
1348	Shifting attention task	-0.013636	{'alpha': 0.5, 'l1_ratio': 0.8}	pca_298	298	pca	0.00627105	-0.019907
1349	Shifting attention task	-0.013636	{'alpha': 0.5, 'l1_ratio': 0.8}	pca_300	300	pca	0.00627105	-0.019907
1350	Shifting attention task	-0.00907025	{'alpha': 0.5, 'l1_ratio': 0.8}	pca_360	360	pca	0.00627105	-0.0153413
1351	Finger tapping task	-0.0061834	{'alpha': 0.2, 'l1_ratio': 0.5}	Yeo 7 networks	7	atlas	0.0453134	-0.0514968
1352	Finger tapping task	-0.0130596	{'alpha': 0.5, 'l1_ratio': 0.2}	Yeo 17 networks	17	atlas	0.0453134	-0.058373
1353	Finger tapping task	0.0489737	{'alpha': 0.2, 'l1_ratio': 0.5}	MNI maxprob per hemisphere	18	atlas	0.0453134	0.0036603
1354	Finger tapping task	0.0451118	{'alpha': 0.2, 'l1_ratio': 0}	Hemisphere	2	atlas	0.0453134	-0.000201567
1355	Finger tapping task	0.0332487	{'alpha': 0.2, 'l1_ratio': 0.2}	MNI maxprob	9	atlas	0.0453134	-0.0120647
1356	Finger tapping task	0.00674574	{'alpha': 0.8, 'l1_ratio': 0.2}	AAL3v1	166	atlas	0.0453134	-0.0385677
1357	Finger tapping task	0.026416	{'alpha': 0.2, 'l1_ratio': 0.5}	HarvardOxford	113	atlas	0.0453134	-0.0188974
1358	Finger tapping task	-0.0122353	{'alpha': 0.5, 'l1_ratio': 0.2}	Brainnetome	246	atlas	0.0453134	-0.0575487
1359	Finger tapping task	0.0230442	{'alpha': 0.2, 'l1_ratio': 0.8}	OASIS DKT	96	atlas	0.0453134	-0.0222692
1360	Finger tapping task	0.00688991	{'alpha': 0.2, 'l1_ratio': 1}	MMP	360	atlas	0.0453134	-0.0384235
1361	Finger tapping task	0.0130009	{'alpha': 0.2, 'l1_ratio': 1}	Schaefer 100	100	atlas	0.0453134	-0.0323125
1362	Finger tapping task	-0.00264497	{'alpha': 0.2, 'l1_ratio': 0.8}	Schaefer 200	200	atlas	0.0453134	-0.0479584
1363	Finger tapping task	0.0044113	{'alpha': 0.8, 'l1_ratio': 0.2}	Schaefer 300	300	atlas	0.0453134	-0.0409021
1364	Finger tapping task	0.0292907	{'alpha': 0.2, 'l1_ratio': 0}	RandomAtlas002_0_RandomAtlas002_0	2	RandomAtlas	0.0453134	-0.0160227
1365	Finger tapping task	0.033437	{'alpha': 0, 'l1_ratio': 0}	RandomAtlas002_1_RandomAtlas002_1	2	RandomAtlas	0.0453134	-0.0118764
1366	Finger tapping task	0.0374032	{'alpha': 0.2, 'l1_ratio': 0}	RandomAtlas002_2_RandomAtlas002_2	2	RandomAtlas	0.0453134	-0.00791019
1367	Finger tapping task	0.0470993	{'alpha': 0.2, 'l1_ratio': 0}	RandomAtlas002_3_RandomAtlas002_3	2	RandomAtlas	0.0453134	0.00178588
1368	Finger tapping task	0.062089	{'alpha': 0.2, 'l1_ratio': 0.2}	RandomAtlas002_4_RandomAtlas002_4	2	RandomAtlas	0.0453134	0.0167757
1369	Finger tapping task	0.0389631	{'alpha': 0.2, 'l1_ratio': 0.2}	Random atlas 3	3	RandomAtlas	0.0453134	-0.0063503
1370	Finger tapping task	0.0336865	{'alpha': 0.2, 'l1_ratio': 0.2}	Random atlas 3	3	RandomAtlas	0.0453134	-0.0116269
1371	Finger tapping task	0.0281455	{'alpha': 0.2, 'l1_ratio': 0}	Random atlas 3	3	RandomAtlas	0.0453134	-0.0171679
1372	Finger tapping task	0.0375233	{'alpha': 0.2, 'l1_ratio': 0}	Random atlas 3	3	RandomAtlas	0.0453134	-0.00779012
1373	Finger tapping task	0.0476878	{'alpha': 0.2, 'l1_ratio': 0}	Random atlas 3	3	RandomAtlas	0.0453134	0.0023744
1374	Finger tapping task	0.0186362	{'alpha': 0.5, 'l1_ratio': 0}	Random atlas 7	7	RandomAtlas	0.0453134	-0.0266772
1375	Finger tapping task	0.0199327	{'alpha': 0.8, 'l1_ratio': 0}	Random atlas 7	7	RandomAtlas	0.0453134	-0.0253807
1376	Finger tapping task	0.0534495	{'alpha': 0.2, 'l1_ratio': 0}	Random atlas 7	7	RandomAtlas	0.0453134	0.00813611
1377	Finger tapping task	0.0298181	{'alpha': 0.2, 'l1_ratio': 0.2}	Random atlas 7	7	RandomAtlas	0.0453134	-0.0154953
1378	Finger tapping task	0.0077458	{'alpha': 0.8, 'l1_ratio': 0}	Random atlas 7	7	RandomAtlas	0.0453134	-0.0375676
1379	Finger tapping task	0.0362987	{'alpha': 0.2, 'l1_ratio': 0.8}	RandomAtlas009_0_RandomAtlas009_0	9	RandomAtlas	0.0453134	-0.00901472
1380	Finger tapping task	-0.00315578	{'alpha': 0.2, 'l1_ratio': 0.2}	RandomAtlas009_1_RandomAtlas009_1	9	RandomAtlas	0.0453134	-0.0484692
1381	Finger tapping task	-0.00142182	{'alpha': 0.2, 'l1_ratio': 0.5}	RandomAtlas009_2_RandomAtlas009_2	9	RandomAtlas	0.0453134	-0.0467352
1382	Finger tapping task	0.0309744	{'alpha': 0.2, 'l1_ratio': 0.2}	RandomAtlas009_3_RandomAtlas009_3	9	RandomAtlas	0.0453134	-0.014339
1383	Finger tapping task	-0.00583445	{'alpha': 1, 'l1_ratio': 0}	RandomAtlas009_4_RandomAtlas009_4	9	RandomAtlas	0.0453134	-0.0511478
1384	Finger tapping task	0.0131181	{'alpha': 0.2, 'l1_ratio': 0.5}	RandomAtlas010_0_RandomAtlas010_0	10	RandomAtlas	0.0453134	-0.0321953
1385	Finger tapping task	0.0110301	{'alpha': 0.2, 'l1_ratio': 0.8}	RandomAtlas010_1_RandomAtlas010_1	10	RandomAtlas	0.0453134	-0.0342833
1386	Finger tapping task	0.00812343	{'alpha': 0.2, 'l1_ratio': 0.5}	RandomAtlas010_2_RandomAtlas010_2	10	RandomAtlas	0.0453134	-0.03719
1387	Finger tapping task	-0.00879851	{'alpha': 1, 'l1_ratio': 0}	RandomAtlas010_3_RandomAtlas010_3	10	RandomAtlas	0.0453134	-0.0541119
1388	Finger tapping task	0.00036668	{'alpha': 1, 'l1_ratio': 0}	RandomAtlas010_4_RandomAtlas010_4	10	RandomAtlas	0.0453134	-0.0449467
1389	Finger tapping task	0.0294426	{'alpha': 1, 'l1_ratio': 0}	Random atlas 12	12	RandomAtlas	0.0453134	-0.0158708
1390	Finger tapping task	0.0391085	{'alpha': 0.2, 'l1_ratio': 0.5}	Random atlas 12	12	RandomAtlas	0.0453134	-0.0062049
1391	Finger tapping task	0.03661	{'alpha': 0.2, 'l1_ratio': 0.5}	Random atlas 12	12	RandomAtlas	0.0453134	-0.00870344
1392	Finger tapping task	0.0118647	{'alpha': 1, 'l1_ratio': 0}	Random atlas 12	12	RandomAtlas	0.0453134	-0.0334487
1393	Finger tapping task	-0.0098735	{'alpha': 0.2, 'l1_ratio': 0.5}	Random atlas 12	12	RandomAtlas	0.0453134	-0.0551869
1394	Finger tapping task	0.00366213	{'alpha': 0.2, 'l1_ratio': 0}	RandomAtlas014_0_RandomAtlas014_0	14	RandomAtlas	0.0453134	-0.0416513
1395	Finger tapping task	0.026229	{'alpha': 0.5, 'l1_ratio': 0}	RandomAtlas014_1_RandomAtlas014_1	14	RandomAtlas	0.0453134	-0.0190844
1396	Finger tapping task	-0.00635156	{'alpha': 0.2, 'l1_ratio': 0.5}	RandomAtlas014_2_RandomAtlas014_2	14	RandomAtlas	0.0453134	-0.051665
1397	Finger tapping task	0.0232006	{'alpha': 0.2, 'l1_ratio': 1}	RandomAtlas014_3_RandomAtlas014_3	14	RandomAtlas	0.0453134	-0.0221128
1398	Finger tapping task	0.0183301	{'alpha': 0.2, 'l1_ratio': 0.5}	RandomAtlas014_4_RandomAtlas014_4	14	RandomAtlas	0.0453134	-0.0269833
1399	Finger tapping task	0.0363372	{'alpha': 1, 'l1_ratio': 0}	Random atlas 17	17	RandomAtlas	0.0453134	-0.00897616
1400	Finger tapping task	0.0283666	{'alpha': 0.2, 'l1_ratio': 0.8}	Random atlas 17	17	RandomAtlas	0.0453134	-0.0169468
1401	Finger tapping task	0.0155903	{'alpha': 1, 'l1_ratio': 0}	Random atlas 17	17	RandomAtlas	0.0453134	-0.0297231
1402	Finger tapping task	0.00299554	{'alpha': 0.5, 'l1_ratio': 0}	Random atlas 17	17	RandomAtlas	0.0453134	-0.0423179
1403	Finger tapping task	0.0467386	{'alpha': 0.2, 'l1_ratio': 0.5}	Random atlas 17	17	RandomAtlas	0.0453134	0.00142521
1404	Finger tapping task	0.0510543	{'alpha': 0.5, 'l1_ratio': 0}	Random atlas 18	18	RandomAtlas	0.0453134	0.00574094
1405	Finger tapping task	-0.000529886	{'alpha': 0.2, 'l1_ratio': 0.8}	Random atlas 18	18	RandomAtlas	0.0453134	-0.0458433
1406	Finger tapping task	-0.0142979	{'alpha': 1, 'l1_ratio': 0}	Random atlas 18	18	RandomAtlas	0.0453134	-0.0596113
1407	Finger tapping task	-0.0458953	{'alpha': 0.2, 'l1_ratio': 0.5}	Random atlas 18	18	RandomAtlas	0.0453134	-0.0912087
1408	Finger tapping task	0.0332346	{'alpha': 0.2, 'l1_ratio': 0.5}	Random atlas 18	18	RandomAtlas	0.0453134	-0.0120788
1409	Finger tapping task	-0.0134006	{'alpha': 0.5, 'l1_ratio': 0.2}	RandomAtlas021_0_RandomAtlas021_0	21	RandomAtlas	0.0453134	-0.058714
1410	Finger tapping task	0.00347902	{'alpha': 1, 'l1_ratio': 0}	RandomAtlas021_1_RandomAtlas021_1	21	RandomAtlas	0.0453134	-0.0418344
1411	Finger tapping task	0.0335671	{'alpha': 1, 'l1_ratio': 0}	RandomAtlas021_2_RandomAtlas021_2	21	RandomAtlas	0.0453134	-0.0117463
1412	Finger tapping task	0.0157379	{'alpha': 1, 'l1_ratio': 0}	RandomAtlas021_3_RandomAtlas021_3	21	RandomAtlas	0.0453134	-0.0295755
1413	Finger tapping task	0.0193314	{'alpha': 0.2, 'l1_ratio': 0}	RandomAtlas021_4_RandomAtlas021_4	21	RandomAtlas	0.0453134	-0.025982
1414	Finger tapping task	-0.00857464	{'alpha': 0.2, 'l1_ratio': 0.2}	RandomAtlas025_0_RandomAtlas025_0	25	RandomAtlas	0.0453134	-0.053888
1415	Finger tapping task	-0.0064333	{'alpha': 1, 'l1_ratio': 0}	RandomAtlas025_1_RandomAtlas025_1	25	RandomAtlas	0.0453134	-0.0517467
1416	Finger tapping task	-0.018792	{'alpha': 0.5, 'l1_ratio': 0.2}	RandomAtlas025_2_RandomAtlas025_2	25	RandomAtlas	0.0453134	-0.0641054
1417	Finger tapping task	-0.0486676	{'alpha': 1, 'l1_ratio': 0}	RandomAtlas025_3_RandomAtlas025_3	25	RandomAtlas	0.0453134	-0.093981
1418	Finger tapping task	-0.000677061	{'alpha': 0.2, 'l1_ratio': 0.2}	RandomAtlas025_4_RandomAtlas025_4	25	RandomAtlas	0.0453134	-0.0459905
1419	Finger tapping task	-0.00947197	{'alpha': 0.5, 'l1_ratio': 0.2}	RandomAtlas031_0_RandomAtlas031_0	31	RandomAtlas	0.0453134	-0.0547854
1420	Finger tapping task	-0.0275844	{'alpha': 1, 'l1_ratio': 0}	RandomAtlas031_1_RandomAtlas031_1	31	RandomAtlas	0.0453134	-0.0728978
1421	Finger tapping task	0.0369195	{'alpha': 0.2, 'l1_ratio': 0.8}	RandomAtlas031_2_RandomAtlas031_2	31	RandomAtlas	0.0453134	-0.00839388
1422	Finger tapping task	0.0409593	{'alpha': 0.2, 'l1_ratio': 0.8}	RandomAtlas031_3_RandomAtlas031_3	31	RandomAtlas	0.0453134	-0.00435409
1423	Finger tapping task	-0.0473252	{'alpha': 0.5, 'l1_ratio': 0.2}	RandomAtlas031_4_RandomAtlas031_4	31	RandomAtlas	0.0453134	-0.0926386
1424	Finger tapping task	0.0152334	{'alpha': 0.2, 'l1_ratio': 0.8}	RandomAtlas037_0_RandomAtlas037_0	37	RandomAtlas	0.0453134	-0.03008
1425	Finger tapping task	0.0116449	{'alpha': 1, 'l1_ratio': 0}	RandomAtlas037_1_RandomAtlas037_1	37	RandomAtlas	0.0453134	-0.0336684
1426	Finger tapping task	-0.0676012	{'alpha': 0.8, 'l1_ratio': 0.2}	RandomAtlas037_2_RandomAtlas037_2	37	RandomAtlas	0.0453134	-0.112915
1427	Finger tapping task	-0.0639993	{'alpha': 1, 'l1_ratio': 0}	RandomAtlas037_3_RandomAtlas037_3	37	RandomAtlas	0.0453134	-0.109313
1428	Finger tapping task	0.0207959	{'alpha': 0.2, 'l1_ratio': 0.5}	RandomAtlas037_4_RandomAtlas037_4	37	RandomAtlas	0.0453134	-0.0245175
1429	Finger tapping task	0.0434373	{'alpha': 0.2, 'l1_ratio': 0.8}	RandomAtlas045_0_RandomAtlas045_0	45	RandomAtlas	0.0453134	-0.00187608
1430	Finger tapping task	0.00937864	{'alpha': 1, 'l1_ratio': 0}	RandomAtlas045_1_RandomAtlas045_1	45	RandomAtlas	0.0453134	-0.0359347
1431	Finger tapping task	-2.29351e-05	{'alpha': 0.2, 'l1_ratio': 1}	RandomAtlas045_2_RandomAtlas045_2	45	RandomAtlas	0.0453134	-0.0453363
1432	Finger tapping task	-0.0252704	{'alpha': 1, 'l1_ratio': 0}	RandomAtlas045_3_RandomAtlas045_3	45	RandomAtlas	0.0453134	-0.0705838
1433	Finger tapping task	0.0572607	{'alpha': 1, 'l1_ratio': 0}	RandomAtlas045_4_RandomAtlas045_4	45	RandomAtlas	0.0453134	0.0119473
1434	Finger tapping task	0.00302752	{'alpha': 0.2, 'l1_ratio': 0.8}	RandomAtlas054_0_RandomAtlas054_0	54	RandomAtlas	0.0453134	-0.0422859
1435	Finger tapping task	-0.0090291	{'alpha': 0.2, 'l1_ratio': 1}	RandomAtlas054_1_RandomAtlas054_1	54	RandomAtlas	0.0453134	-0.0543425
1436	Finger tapping task	0.00103609	{'alpha': 0.5, 'l1_ratio': 0.2}	RandomAtlas054_2_RandomAtlas054_2	54	RandomAtlas	0.0453134	-0.0442773
1437	Finger tapping task	0.0422953	{'alpha': 0.2, 'l1_ratio': 0.8}	RandomAtlas054_3_RandomAtlas054_3	54	RandomAtlas	0.0453134	-0.0030181
1438	Finger tapping task	0.0279423	{'alpha': 0.2, 'l1_ratio': 0.8}	RandomAtlas054_4_RandomAtlas054_4	54	RandomAtlas	0.0453134	-0.0173711
1439	Finger tapping task	-0.053223	{'alpha': 1, 'l1_ratio': 0}	RandomAtlas065_0_RandomAtlas065_0	65	RandomAtlas	0.0453134	-0.0985364
1440	Finger tapping task	0.0246852	{'alpha': 0.2, 'l1_ratio': 0.8}	RandomAtlas065_1_RandomAtlas065_1	65	RandomAtlas	0.0453134	-0.0206282
1441	Finger tapping task	-0.027804	{'alpha': 0.2, 'l1_ratio': 1}	RandomAtlas065_2_RandomAtlas065_2	65	RandomAtlas	0.0453134	-0.0731174
1442	Finger tapping task	0.00893399	{'alpha': 0.5, 'l1_ratio': 0.2}	RandomAtlas065_3_RandomAtlas065_3	65	RandomAtlas	0.0453134	-0.0363794
1443	Finger tapping task	-0.0568645	{'alpha': 1, 'l1_ratio': 0}	RandomAtlas065_4_RandomAtlas065_4	65	RandomAtlas	0.0453134	-0.102178
1444	Finger tapping task	-0.0100063	{'alpha': 1, 'l1_ratio': 0}	RandomAtlas079_0_RandomAtlas079_0	79	RandomAtlas	0.0453134	-0.0553197
1445	Finger tapping task	0.016821	{'alpha': 0.8, 'l1_ratio': 0.2}	RandomAtlas079_1_RandomAtlas079_1	79	RandomAtlas	0.0453134	-0.0284924
1446	Finger tapping task	0.00301919	{'alpha': 0.2, 'l1_ratio': 0.8}	RandomAtlas079_2_RandomAtlas079_2	79	RandomAtlas	0.0453134	-0.0422942
1447	Finger tapping task	0.027947	{'alpha': 0.2, 'l1_ratio': 1}	RandomAtlas079_3_RandomAtlas079_3	79	RandomAtlas	0.0453134	-0.0173664
1448	Finger tapping task	0.0195142	{'alpha': 0.2, 'l1_ratio': 0.8}	RandomAtlas079_4_RandomAtlas079_4	79	RandomAtlas	0.0453134	-0.0257992
1449	Finger tapping task	-0.0113961	{'alpha': 0.5, 'l1_ratio': 0.2}	Random atlas 96	96	RandomAtlas	0.0453134	-0.0567095
1450	Finger tapping task	0.00566404	{'alpha': 0.8, 'l1_ratio': 0.2}	Random atlas 96	96	RandomAtlas	0.0453134	-0.0396494
1451	Finger tapping task	0.0423118	{'alpha': 0.2, 'l1_ratio': 1}	Random atlas 96	96	RandomAtlas	0.0453134	-0.0030016
1452	Finger tapping task	-0.0265458	{'alpha': 0.8, 'l1_ratio': 0.2}	Random atlas 96	96	RandomAtlas	0.0453134	-0.0718592
1453	Finger tapping task	0.026036	{'alpha': 0.2, 'l1_ratio': 1}	Random atlas 96	96	RandomAtlas	0.0453134	-0.0192774
1454	Finger tapping task	-0.0221553	{'alpha': 0.8, 'l1_ratio': 0.2}	RandomAtlas100_0_RandomAtlas100_0	100	RandomAtlas	0.0453134	-0.0674687
1455	Finger tapping task	0.00331423	{'alpha': 0.2, 'l1_ratio': 1}	RandomAtlas100_1_RandomAtlas100_1	100	RandomAtlas	0.0453134	-0.0419992
1456	Finger tapping task	-0.000713274	{'alpha': 0.8, 'l1_ratio': 0.2}	RandomAtlas100_2_RandomAtlas100_2	100	RandomAtlas	0.0453134	-0.0460267
1457	Finger tapping task	-0.00589643	{'alpha': 0.2, 'l1_ratio': 0.8}	RandomAtlas100_3_RandomAtlas100_3	100	RandomAtlas	0.0453134	-0.0512098
1458	Finger tapping task	0.0119544	{'alpha': 0.5, 'l1_ratio': 0.2}	RandomAtlas100_4_RandomAtlas100_4	100	RandomAtlas	0.0453134	-0.033359
1459	Finger tapping task	0.00521319	{'alpha': 0.8, 'l1_ratio': 0.2}	Random atlas 113	113	RandomAtlas	0.0453134	-0.0401002
1460	Finger tapping task	-0.0336746	{'alpha': 0.8, 'l1_ratio': 0.2}	Random atlas 113	113	RandomAtlas	0.0453134	-0.078988
1461	Finger tapping task	-0.0255534	{'alpha': 0.5, 'l1_ratio': 0.2}	Random atlas 113	113	RandomAtlas	0.0453134	-0.0708668
1462	Finger tapping task	0.00530312	{'alpha': 0.2, 'l1_ratio': 1}	Random atlas 113	113	RandomAtlas	0.0453134	-0.0400103
1463	Finger tapping task	0.0171549	{'alpha': 0.8, 'l1_ratio': 0.2}	Random atlas 113	113	RandomAtlas	0.0453134	-0.0281585
1464	Finger tapping task	0.0259152	{'alpha': 0.2, 'l1_ratio': 0.8}	RandomAtlas116_0_RandomAtlas116_0	116	RandomAtlas	0.0453134	-0.0193982
1465	Finger tapping task	0.0419645	{'alpha': 0.2, 'l1_ratio': 0.8}	RandomAtlas116_1_RandomAtlas116_1	116	RandomAtlas	0.0453134	-0.00334894
1466	Finger tapping task	-0.0343736	{'alpha': 0.5, 'l1_ratio': 0.2}	RandomAtlas116_2_RandomAtlas116_2	116	RandomAtlas	0.0453134	-0.079687
1467	Finger tapping task	-0.0303119	{'alpha': 1, 'l1_ratio': 0.2}	RandomAtlas116_3_RandomAtlas116_3	116	RandomAtlas	0.0453134	-0.0756253
1468	Finger tapping task	0.0322137	{'alpha': 0.2, 'l1_ratio': 0.8}	RandomAtlas116_4_RandomAtlas116_4	116	RandomAtlas	0.0453134	-0.0130997
1469	Finger tapping task	0.0311806	{'alpha': 0.2, 'l1_ratio': 1}	RandomAtlas140_0_RandomAtlas140_0	140	RandomAtlas	0.0453134	-0.0141328
1470	Finger tapping task	0.0010413	{'alpha': 1, 'l1_ratio': 0.2}	RandomAtlas140_1_RandomAtlas140_1	140	RandomAtlas	0.0453134	-0.0442721
1471	Finger tapping task	0.00300732	{'alpha': 0.2, 'l1_ratio': 0.8}	RandomAtlas140_2_RandomAtlas140_2	140	RandomAtlas	0.0453134	-0.0423061
1472	Finger tapping task	0.0175039	{'alpha': 0.2, 'l1_ratio': 0.8}	RandomAtlas140_3_RandomAtlas140_3	140	RandomAtlas	0.0453134	-0.0278095
1473	Finger tapping task	0.00523177	{'alpha': 0.2, 'l1_ratio': 1}	RandomAtlas140_4_RandomAtlas140_4	140	RandomAtlas	0.0453134	-0.0400816
1474	Finger tapping task	0.00925595	{'alpha': 0.8, 'l1_ratio': 0.2}	Random atlas 166	166	RandomAtlas	0.0453134	-0.0360574
1475	Finger tapping task	-0.0355799	{'alpha': 0.5, 'l1_ratio': 0.2}	Random atlas 166	166	RandomAtlas	0.0453134	-0.0808933
1476	Finger tapping task	-0.00171953	{'alpha': 0.8, 'l1_ratio': 0.2}	Random atlas 166	166	RandomAtlas	0.0453134	-0.0470329
1477	Finger tapping task	-0.0525666	{'alpha': 0.2, 'l1_ratio': 1}	Random atlas 166	166	RandomAtlas	0.0453134	-0.09788
1478	Finger tapping task	0.00255976	{'alpha': 0.8, 'l1_ratio': 0.2}	Random atlas 166	166	RandomAtlas	0.0453134	-0.0427536
1479	Finger tapping task	0.0238266	{'alpha': 0.8, 'l1_ratio': 0.2}	RandomAtlas169_0_RandomAtlas169_0	169	RandomAtlas	0.0453134	-0.0214868
1480	Finger tapping task	0.0060912	{'alpha': 0.2, 'l1_ratio': 0.8}	RandomAtlas169_1_RandomAtlas169_1	169	RandomAtlas	0.0453134	-0.0392222
1481	Finger tapping task	0.017362	{'alpha': 0.8, 'l1_ratio': 0.2}	RandomAtlas169_2_RandomAtlas169_2	169	RandomAtlas	0.0453134	-0.0279514
1482	Finger tapping task	0.00700894	{'alpha': 0.2, 'l1_ratio': 1}	RandomAtlas169_3_RandomAtlas169_3	169	RandomAtlas	0.0453134	-0.0383045
1483	Finger tapping task	0.00135765	{'alpha': 0.5, 'l1_ratio': 0.5}	RandomAtlas169_4_RandomAtlas169_4	169	RandomAtlas	0.0453134	-0.0439557
1484	Finger tapping task	0.00969682	{'alpha': 0.2, 'l1_ratio': 1}	Random atlas 200	200	RandomAtlas	0.0453134	-0.0356166
1485	Finger tapping task	0.00863497	{'alpha': 0.2, 'l1_ratio': 0.8}	Random atlas 200	200	RandomAtlas	0.0453134	-0.0366784
1486	Finger tapping task	0.0332045	{'alpha': 0.2, 'l1_ratio': 1}	Random atlas 200	200	RandomAtlas	0.0453134	-0.0121089
1487	Finger tapping task	0.0165457	{'alpha': 0.8, 'l1_ratio': 0.2}	Random atlas 200	200	RandomAtlas	0.0453134	-0.0287677
1488	Finger tapping task	0.00833291	{'alpha': 0.5, 'l1_ratio': 0.2}	Random atlas 200	200	RandomAtlas	0.0453134	-0.0369805
1489	Finger tapping task	-0.0102326	{'alpha': 0.8, 'l1_ratio': 0.2}	RandomAtlas204_0_RandomAtlas204_0	204	RandomAtlas	0.0453134	-0.055546
1490	Finger tapping task	0.0151268	{'alpha': 0.8, 'l1_ratio': 0.2}	RandomAtlas204_1_RandomAtlas204_1	204	RandomAtlas	0.0453134	-0.0301866
1491	Finger tapping task	-0.0271299	{'alpha': 0.5, 'l1_ratio': 0.5}	RandomAtlas204_2_RandomAtlas204_2	204	RandomAtlas	0.0453134	-0.0724433
1492	Finger tapping task	0.0134527	{'alpha': 0.2, 'l1_ratio': 1}	RandomAtlas204_3_RandomAtlas204_3	204	RandomAtlas	0.0453134	-0.0318607
1493	Finger tapping task	0.00445662	{'alpha': 0.2, 'l1_ratio': 0.8}	RandomAtlas204_4_RandomAtlas204_4	204	RandomAtlas	0.0453134	-0.0408568
1494	Finger tapping task	-0.0172013	{'alpha': 0.2, 'l1_ratio': 1}	Random atlas 246	246	RandomAtlas	0.0453134	-0.0625147
1495	Finger tapping task	0.0183872	{'alpha': 0.8, 'l1_ratio': 0.2}	Random atlas 246	246	RandomAtlas	0.0453134	-0.0269262
1496	Finger tapping task	0.0118696	{'alpha': 0.8, 'l1_ratio': 0.2}	Random atlas 246	246	RandomAtlas	0.0453134	-0.0334438
1497	Finger tapping task	0.0184409	{'alpha': 0.8, 'l1_ratio': 0.2}	Random atlas 246	246	RandomAtlas	0.0453134	-0.0268725
1498	Finger tapping task	-0.0192855	{'alpha': 1, 'l1_ratio': 0.2}	Random atlas 246	246	RandomAtlas	0.0453134	-0.0645989
1499	Finger tapping task	0.0300584	{'alpha': 0.2, 'l1_ratio': 1}	RandomAtlas298_0_RandomAtlas298_0	298	RandomAtlas	0.0453134	-0.015255
1500	Finger tapping task	0.0127168	{'alpha': 1, 'l1_ratio': 0.2}	RandomAtlas298_1_RandomAtlas298_1	298	RandomAtlas	0.0453134	-0.0325965
1501	Finger tapping task	0.00478002	{'alpha': 0.2, 'l1_ratio': 1}	RandomAtlas298_2_RandomAtlas298_2	298	RandomAtlas	0.0453134	-0.0405334
1502	Finger tapping task	-0.0191017	{'alpha': 0.8, 'l1_ratio': 0.2}	RandomAtlas298_3_RandomAtlas298_3	298	RandomAtlas	0.0453134	-0.0644151
1503	Finger tapping task	-0.0069946	{'alpha': 1, 'l1_ratio': 0.2}	RandomAtlas298_4_RandomAtlas298_4	298	RandomAtlas	0.0453134	-0.052308
1504	Finger tapping task	0.00736802	{'alpha': 1, 'l1_ratio': 0.2}	Random atlas 300	300	RandomAtlas	0.0453134	-0.0379454
1505	Finger tapping task	-0.00342317	{'alpha': 0.2, 'l1_ratio': 1}	Random atlas 300	300	RandomAtlas	0.0453134	-0.0487366
1506	Finger tapping task	0.025963	{'alpha': 0.8, 'l1_ratio': 0.2}	Random atlas 300	300	RandomAtlas	0.0453134	-0.0193504
1507	Finger tapping task	0.00902444	{'alpha': 0.2, 'l1_ratio': 1}	Random atlas 300	300	RandomAtlas	0.0453134	-0.036289
1508	Finger tapping task	-0.00492611	{'alpha': 1, 'l1_ratio': 0.2}	Random atlas 300	300	RandomAtlas	0.0453134	-0.0502395
1509	Finger tapping task	-0.00686732	{'alpha': 0.5, 'l1_ratio': 0.5}	Random atlas 360	360	RandomAtlas	0.0453134	-0.0521807
1510	Finger tapping task	-0.00631515	{'alpha': 0.5, 'l1_ratio': 0.5}	Random atlas 360	360	RandomAtlas	0.0453134	-0.0516285
1511	Finger tapping task	0.0265343	{'alpha': 0.2, 'l1_ratio': 1}	Random atlas 360	360	RandomAtlas	0.0453134	-0.0187791
1512	Finger tapping task	0.0114416	{'alpha': 0.5, 'l1_ratio': 0.5}	Random atlas 360	360	RandomAtlas	0.0453134	-0.0338718
1513	Finger tapping task	-0.000817409	{'alpha': 1, 'l1_ratio': 0.2}	Random atlas 360	360	RandomAtlas	0.0453134	-0.0461308
1514	Finger tapping task	0.0137393	{'alpha': 0.2, 'l1_ratio': 0}	pca_2	2	pca	0.0453134	-0.0315741
1515	Finger tapping task	0.0105521	{'alpha': 0.5, 'l1_ratio': 0}	pca_3	3	pca	0.0453134	-0.0347613
1516	Finger tapping task	0.0398279	{'alpha': 0.8, 'l1_ratio': 0}	pca_7	7	pca	0.0453134	-0.00548548
1517	Finger tapping task	0.0162787	{'alpha': 0.2, 'l1_ratio': 0.8}	pca_9	9	pca	0.0453134	-0.0290347
1518	Finger tapping task	0.00648575	{'alpha': 0.2, 'l1_ratio': 0.8}	pca_10	10	pca	0.0453134	-0.0388276
1519	Finger tapping task	0.000974034	{'alpha': 0.8, 'l1_ratio': 0}	pca_12	12	pca	0.0453134	-0.0443394
1520	Finger tapping task	0.00095934	{'alpha': 0.2, 'l1_ratio': 0.5}	pca_14	14	pca	0.0453134	-0.0443541
1521	Finger tapping task	0.0158242	{'alpha': 0.2, 'l1_ratio': 0.5}	pca_17	17	pca	0.0453134	-0.0294892
1522	Finger tapping task	0.0158242	{'alpha': 0.2, 'l1_ratio': 0.5}	pca_18	18	pca	0.0453134	-0.0294892
1523	Finger tapping task	0.0130169	{'alpha': 0.5, 'l1_ratio': 0.2}	pca_21	21	pca	0.0453134	-0.0322965
1524	Finger tapping task	0.0183907	{'alpha': 0.2, 'l1_ratio': 0.5}	pca_25	25	pca	0.0453134	-0.0269227
1525	Finger tapping task	-0.0448254	{'alpha': 1, 'l1_ratio': 0}	pca_31	31	pca	0.0453134	-0.0901388
1526	Finger tapping task	0.0253695	{'alpha': 0.2, 'l1_ratio': 0.8}	pca_37	37	pca	0.0453134	-0.0199439
1527	Finger tapping task	0.0012874	{'alpha': 0.2, 'l1_ratio': 0.8}	pca_45	45	pca	0.0453134	-0.044026
1528	Finger tapping task	0.0463537	{'alpha': 0.2, 'l1_ratio': 0.8}	pca_54	54	pca	0.0453134	0.00104035
1529	Finger tapping task	0.0720207	{'alpha': 0.2, 'l1_ratio': 0.8}	pca_65	65	pca	0.0453134	0.0267073
1530	Finger tapping task	0.0720207	{'alpha': 0.2, 'l1_ratio': 0.8}	pca_79	79	pca	0.0453134	0.0267073
1531	Finger tapping task	0.0720207	{'alpha': 0.2, 'l1_ratio': 0.8}	pca_96	96	pca	0.0453134	0.0267073
1532	Finger tapping task	0.0656323	{'alpha': 0.2, 'l1_ratio': 0.8}	pca_100	100	pca	0.0453134	0.0203189
1533	Finger tapping task	0.0497315	{'alpha': 0.2, 'l1_ratio': 1}	pca_113	113	pca	0.0453134	0.00441812
1534	Finger tapping task	0.0497315	{'alpha': 0.2, 'l1_ratio': 1}	pca_116	116	pca	0.0453134	0.00441812
1535	Finger tapping task	0.0505279	{'alpha': 0.2, 'l1_ratio': 1}	pca_140	140	pca	0.0453134	0.00521454
1536	Finger tapping task	0.0530354	{'alpha': 0.2, 'l1_ratio': 1}	pca_166	166	pca	0.0453134	0.00772204
1537	Finger tapping task	0.0505012	{'alpha': 0.2, 'l1_ratio': 1}	pca_169	169	pca	0.0453134	0.00518783
1538	Finger tapping task	0.0412547	{'alpha': 0.2, 'l1_ratio': 1}	pca_200	200	pca	0.0453134	-0.00405871
1539	Finger tapping task	0.0412885	{'alpha': 0.2, 'l1_ratio': 1}	pca_204	204	pca	0.0453134	-0.00402493
1540	Finger tapping task	0.0369652	{'alpha': 0.2, 'l1_ratio': 1}	pca_246	246	pca	0.0453134	-0.00834818
1541	Finger tapping task	0.0397878	{'alpha': 0.2, 'l1_ratio': 1}	pca_298	298	pca	0.0453134	-0.00552561
1542	Finger tapping task	0.0397878	{'alpha': 0.2, 'l1_ratio': 1}	pca_300	300	pca	0.0453134	-0.00552561
1543	Finger tapping task	-0.0241433	{'alpha': 0.2, 'l1_ratio': 1}	pca_360	360	pca	0.0453134	-0.0694566
